# Supplementary material for: Hypothesis-free evaluation of circulating metabolome provides cell-specific insights regarding the role of energy substrate availability in amyotrophic lateral sclerosis
Source: Research Square preprint supplement (doi:10.21203/rs.3.rs-7811456/v1), 2025-10-25
Supplement: Supplementary file 1 [file 25c503dfc2c4855931704f67.xlsx]

## Sheet: Description
Sheets 1-4:- Raw data for Seahorse experiments (Fig 4A)
Sheets 5:23:- raw data for metabaloite utilisation experiment (Fig4B)
Sheet 24:- raw data for metabolic flex (Fig4C)
NTG:- Non-transgenic control line
TG:- Transgentic line

## Sheet:  25mM ECAR
NTG.25.MAX	NTG.25.GLY	NTG.25.RES	TG.25.MAX	TG.25.GLY	TG.25.RES
100	100	100	106.203	102.354	122.811
100	100	100	103.629	95.944	109.886
100	100	100	79.7081	99.4774	73.3958
100	100	100	91.2751	96.8133	95.6304
100	100	100	83.0821	83.0218	105.45

## Sheet: 25mM OCAR
NTG25.MR	NTG25.PL	NTG25.CR	NTG25.SRC	TG25.MR	TG25.PL	TG25.CR	TG25.SRC
100	100	100	100	85.2393	71.494	90.5814	118.332
100	100	100	100	99.2612	95.362	100.777	92.2324
100	100	100	100	81.2837	86.2878	79.3388	55.1965
100	100	100	100	120.735	121.433	120.391	87.1121
100	100	100	100	70.7754	56.939	77.607	110.182
100	100	100	100	91.0879	92.0253	90.625	57.2322

## Sheet: 5mM ECAR
NTG.5.MAX	NTG.5.GLY	NTG.5.RES	TG.5.MAX	TG.5.GLY	TG.5.RES
100	100	100	104.044	89.9017	98.9817
100	100	100	110.2	89.4494	124.107
100	100	100	74.3305	75.4587	65.5005
100	100	100	91.6968	116.34	76.302
100	100	100	86.4767	89.807	77.7109
100	100	100	102.204	103.431	94.9943

## Sheet: 5mM OCR
NTG.MR	NTG.PL	NTG.CR	NTG.SRC	TG.MR	TG.PL	TG.CR	TG.SRC
100	100	100	100	95.8221	129.714	85.2552	64.7707
100	100	100	100	66.0522	80.3763	61.579	73.1268
100	100	100	100	75.0268	105.073	65.6611	27.5906
100	100	100	100	120.735	121.433	120.391	87.1121
100	100	100	100	70.7754	56.939	77.607	110.182
100	100	100	100	91.0879	92.0253	90.625	57.2322

## Sheet: AAA
Time (mins)	NTG	NTG.1	NTG.2	NTG.3	NTG.4	NTG.5	TG	TG.1	TG.2	TG.3	TG.4	TG.5
0	0.000822634	0.000515965	0.000669766	0.000476544	0.000486232	0.000722907	0	0	0	0	0	0
5	0.00164527	0.000942629	0.00132953	0.000914965	0.000250266	0.00102488	0	0	0	0	0	0
10	0.00164527	0.0011312	0.000939671	0.000972151	0.000264567	0.00129025	0	0	0	0	2.83672e-05	0
15	0.0016675	0.00107162	0.00117959	0.000953089	0.000393276	0.000979127	0.0001646	0.0001514	0	0.00012076	0.000217482	0
20	0.00104497	0.00140898	0.00134953	0.00180134	0.000557736	0.001336	0.0003409	2.754e-05	0	0.000144912	0	7.21523e-05
25	0.000978267	0.00126015	0.00107962	0.00102934	0.000421878	0.00113469	0.0002234	0	0	0.00018114	0	0.000144305
30	0.0016008	0.0009228	0.00180937	0.0010484	0.00045763	0.0013177	7.053e-05	0.0007435	3.248e-05	0.00018114	0	0.000391684
35	0.00158968	0.000883094	0.00159944	0.00127714	0.000800852	0.00158307	0.00024687	0.00050941	0	0	0.000567344	0.000401991
40	0.00134512	0.0013197	0.0010896	0.00131526	0.000557736	0.00177524	0.000387939	0.000358	0	0.00018114	0.000151292	0.000412299
45	0.00124507	0.00125022	0.00148948	0.00152494	0.000736498	0.00133601	3.527e-05	0.0001377	0	0.000567571	0.000122924	0.000505066
50	0.0013785	0.0012205	0.00117959	0.000791064	0.00060779	0.0019308	0.000352671	0.0003167	0.000173205	7.24559e-05	0.000170203	0.00061845
55	0.0020566	0.0012998	0.0012596	0.00111511	0.0007651	0.00208636	3.527e-05	0.0003442	0	0.000555495	4.72786e-05	0.00068029
60	0.0018676	0.0012701	0.0014395	0.00193477	0.000679294	0.00132686	0.0003056	0.0006471	0.00034641	0.000205292	3.78229e-05	0.000474144
65	0.0012784	0.0015082	0.0014695	0.00125808	0.000808003	0.00117129	0.000540763	0.0008123	0.000443838	0.00024152	0	0.00051537
70	0.0014674	0.0014884	0.0017094	0.00112465	0.00075795	0.00143666	0.0007641	0.0008123	0	0.000422659	0.000453875	0.00063906
75	0.001145	0.0015479	0.0011896	0.0016965	0.000750799	0.00143666	0.000775877	0.0009913	0	0.000386431	0	0.000535989
80	0.0013785	0.000912861	0.0015295	0.00137245	0.00100106	0.00178439	0.0006348	0.00133548	0	0.0003019	0.000189115	0.00059783
85	0.0018009	0.0014983	0.0014295	0.00128667	0.000850906	0.00125365	0.000458473	0.0007435	0.00034641	0.000205292	0.00013238	0.000597833
90	0.0021122	0.00150821	0.0016094	0.00102934	0.000958163	0.00156477	0.0001763	0.00117027	0.0001299	0.00031398	0.000151292	0.000793675
95	0.0013896	0.0013395	0.00106963	0.00109605	0.000843755	0.0012262	0.0003527	0.000867374	0	1.2076e-05	0.000236393	0.00076275
100	0.0012117	0.00140898	0.0012995	0.00108652	0.000865207	0.00143666	0.000858167	0.00107389	2.165e-05	0.000446811	0.000453875	0.00072152
105	0.0012228	0.00146852	0.0015495	0.00138198	0.00134429	0.00158307	0.0005525	0.0015833	0.0002057	0	4.72786e-05	0.000597833
110	0.0010227	0.0009823	0.00164942	0.00112465	0.00102252	0.00141836	0.000858167	0.0010739	0.000313934	0.00024152	0.000141836	0.00078337
115	0.0010672	0.001796	0.0013295	0.00114371	0.000908109	0.0012811	0.000446717	0.0014869	0.0003031	0.000265672	0	0.00093798
120	0.0010783	0.001657	0.0014095	0.00107699	0.00100106	0.00146412	0.000623053	0.0013492	0.000184	0.000156988	0.000170203	0.000546296
125	0.0011117	0.0013891	0.0017994	0.00114371	0.00142294	0.00141836	0.0005408	0.00126664	0.0002165	0.000265672	0.000170203	0.00079368
130	0.0011228	0.0014487	0.0015495	0.000914965	0.00112262	0.00161053	0.0004937	0.0015833	0.00018403	0.000156988	0.000349862	0.00077306
135	0.0010783	0.0012601	0.0018094	0.000914965	0.00102967	0.00136346	0.000881679	0.0016384	0.0001624	0.000289824	0.000482242	0.00101013
140	0.0010005	0.0010022	0.0012296	0.000981682	0.00119413	0.00140921	0.000634809	0.00187243	0.00034641	0.000398507	0.000113469	0.000824598
145	0.0010005	0.0011907	0.0019593	0.00199196	0.00132999	0.00161053	0.0007171	0.0016246	0.000248982	0.000362279	0.00013238	0.00085552
150	0.00090045	0.0015578	0.00124956	0.00145823	0.00184482	0.00161968	0.0008817	0.00191373	0.0002273	0.000362279	0.000179659	0.000762753
155	0.00096715	0.0011907	0.0013295	0.00119136	0.00133714	0.00145496	0.0007876	0.0018862	0.000357236	0.000434735	0.000226937	0.000958595
160	0.00102273	0.0016273	0.0013795	0.0014201	0.00127993	0.00156477	0.0011403	0.0015145	0.000281458	0.000156988	0.000567344	0.00083491
165	0.00102273	0.0015181	0.00131954	0.00139151	0.00143724	0.00182099	0.0007171	0.00205141	0.000281458	0.000277748	0.00031204	0.00102044
170	0.00096715	0.0016074	0.0016394	0.00096262	0.00160885	0.00147327	0.000893434	0.00205141	0.000411362	0.000156988	0.000283672	0.000968902
175	0.00102273	0.0015479	0.00186935	0.00101027	0.00123703	0.00168373	0.000834656	0.0020239	0.000703646	0.000374355	0.000208026	0.000999825
180	0.0009227	0.0013891	0.0012596	0.000981682	0.00128708	0.00144581	0.0009757	0.0018174	8.66e-05	0.000289824	0.000236393	0.00098952
185	0.0010227	0.0015082	0.0015794	0.00115324	0.00115838	0.00166543	0.000764122	0.0023405	0	0.000398507	0.000170203	0.000948287
190	0.0007671	0.0013197	0.00138951	0.00116277	0.00149445	0.00166543	0.000975724	0.0026159	0.0001732	0.000519267	0.000293128	0.00102044
195	0.000844867	0.0014784	0.0015894	0.000972151	0.00153735	0.00171119	0.000952213	0.00210648	0.000238157	2.4152e-05	0.000463331	0.00115444
200	0.0009116	0.0018456	0.0016894	0.00116277	0.00142294	0.00166543	0.000764122	0.0018311	0.000216506	0.000229444	0.00019857	0.00089675
205	0.000811517	0.001915	0.00173939	0.00122948	0.00148015	0.00158307	0.0009052	0.00217532	0.0002273	0.000326052	7.56458e-05	0.000793675
210	0.0007893	0.0016471	0.00162943	0.00126761	0.00148015	0.00158307	0.00118733	0.0019	9.743e-05	0.00012076	0.00017966	0.00107198
215	0.0010227	0.0008831	0.0017194	0.000991213	0.00145155	0.0018942	0.0012108	0.0018862	0.000173205	0	0.000661901	0.0012369
220	0.000822634	0.0012899	0.00194932	0.00146776	0.00165176	0.0019125	0.00145771	0.00225793	0.000292284	0.000338127	0.000245849	0.00113382
225	0.00111167	0.001538	0.00178937	0.00141057	0.0015016	0.00169288	0.0010815	0.0022166	7.578e-05	0.000229444	0.00026476	0.00102044
230	0.0009116	0.0013395	0.00160944	0.000848249	0.00160885	0.00175694	0.0013872	0.0019826	0.000335585	0.000229444	0.000302583	0.00102044
235	0.000811517	0.0013494	0.0019793	0.00147729	0.00140149	0.00176609	0.00115206	0.0018724	5.413e-05	0.000229444	0.000368773	0.00103075
240	0.0010005	0.0012998	0.0015794	0.000924496	0.00140864	0.00199486	0.0012696	0.0020376	0.00018403	0	0.000208026	0.00099982
245	0.0007782	0.001657	0.00163943	0.000895904	0.0015302	0.0019125	0.0009405	0.0020652	0.000129904	0.00018114	0.000255305	0.000968902
250	0.0008449	0.0015281	0.0023692	0.000848249	0.00149445	0.00172949	0.00149298	0.00220286	8.66e-05	0	0.000340406	0.000886443
255	0.000678117	0.0016273	0.0018693	0.000876842	0.00163031	0.00209552	0.001493	0.00225793	0.000313934	0.00021737	0.000453875	0.00121628
260	0.0007115	0.001409	0.0023092	0.00109605	0.00187342	0.00184845	0.00131664	0.00246445	0.00018403	0	0.000576799	0.00104105
265	0.0006225	0.0017364	0.0022992	0.000895904	0.00143724	0.00200401	0.00111679	0.001955	0	6.03799e-05	0.000652445	0.00112351
270	0.0006114	0.0014586	0.0021592	0.000934027	0.0015159	0.00208636	0.0013872	0.0023543	0.000119079	0	0.000491698	0.00089675
275	0.0007004	0.0012006	0.0022592	0.0016965	0.00145155	0.0018393	0.001011	0.0022717	0.000205681	0.00012076	0.000614622	0.00105136
280	0.0006003	0.0014288	0.0020593	0.00158213	0.00180907	0.0019308	0.00129313	0.002313	0.000194856	0	0.000671357	0.00105136
285	0.0007115	0.0017265	0.0022192	0.00141057	0.00163746	0.00219617	0.00156351	0.001955	5.413e-05	0.000265672	0.000359318	0.00106167
290	0.000678117	0.0014288	0.0017794	0.00106746	0.00178762	0.00177524	0.00150473	0.0023956	0.000140729	0.000132836	0.000302583	0.00113382
295	0.0006559	0.0015777	0.0023692	0.000886373	0.00175186	0.00176609	0.0014342	0.0024782	0.000335585	0	0.000302583	0.00122659
300	0.000478	0.0017364	0.0018593	0.000810126	0.00184482	0.00183014	0.0015988	0.0022717	0.000108253	0.000144912	0.000728091	0.0012369
305	0.0006781	0.0016273	0.0019393	0.00103887	0.00170896	0.00184845	0.0012814	0.00201011	0.000173205	0	0.000472786	0.00121628
310	0.0005114	0.0016471	0.0016994	0.00105793	0.00175186	0.00233343	0.00182214	0.0022579	0	0.000108684	0.000690268	0.00127813
315	0.0005558	0.0015975	0.0020093	0.00106746	0.00178047	0.00184845	0.0016811	0.0023956	0	0.000205292	0.000434964	0.00116474
320	0.0005781	0.0015677	0.0019293	0.00119136	0.00158025	0.00216872	0.001058	0.0026159	0	0	0.000189115	0.00120597
325	0.0005558	0.0015677	0.0019793	0.000772002	0.00155165	0.00208636	0.0015165	0.0025195	7.57773e-05	2.4152e-05	0.000510609	0.00097921
330	0.0004669	0.0015479	0.0019693	0.00118183	0.00193063	0.00209552	0.0014107	0.0023956	0	0	0.000406596	0.001144
335	0.0005225	0.0014586	0.0025991	0.00115324	0.00188057	0.00198571	0.00198672	0.0023543	0.000216506	0.000156988	0.000255305	0.001144
340	0.0004558	0.0015578	0.00167941	0.000781533	0.00175186	0.00231513	0.0014342	0.0023543	0.000184	0	0.000274216	0.001556
345	0.0005558	0.0014387	0.0018294	0.000981682	0.00195208	0.00203146	0.00145771	0.0023956	0	0	0.000576799	0.001453
350	0.0004336	0.0013494	0.0020393	0.000743409	0.00188057	0.00217787	0.00154	0.00205141	0.0001191	0	0.000520065	0.001216

## Sheet: Alpha KG
Time (mins)	NTG	NTG.1	NTG.2	NTG.3	NTG.4	NTG.5	TG	TG.1	TG.2	TG.3	TG.4	TG.5
0	0.000200815	0.000137754	0.000204217	0.000172331	6.8819e-05	0.000249666	0	0	0	0	0	0
5	0.000431753	0.000243719	0.000625415	0.000134868	0.00014624	0.000183578	0	0	0	0	0	0
10	0.000311264	0.0001589	0.000242508	0.000292214	3.44095e-05	0.00033044	0	0	0	0	0	0
15	0.000331345	0.000254315	0.000319089	0.000209794	0.000163445	0.000124833	0	0	0	0	0	0
20	4.01631e-05	0.000233122	0.000421198	0.000494515	0.000103228	0.000190921	0	0	0	0	0	0
25	0.00013053	0.000264912	0.000382907	0.000157346	0.00014624	0.000161549	0	0	0	0	0	0
30	0.0004217	0.0001589	0.000740287	0.000217287	8.60237e-05	0.00026435	0	0	0	0	0	0
35	0.000411671	0.000275508	0.000433961	0.000262243	6.02166e-05	0.000389185	0	0	0	0	0	0
40	7.02854e-05	0.0002649	0.0002425	0.000427081	0.000129036	0.000345126	0	0	0	0	0	0
45	0.000220897	6.35789e-05	0.000446725	0.00047953	0.000137638	0.00025701	0	0	0	0	0	0
50	0.0003715	9.537e-05	0.000242508	0.000352155	6.02166e-05	0.00049199	0	0	0	0	0	0
55	0.0005623	0.0003391	0.0003829	0.000449559	0.000197855	0.00063885	0	0	0	0	0	0
60	0.000451834	0.0001801	0.0003446	0.000689324	0.000120433	0.000249666	0	0	0	0	0	0
65	0.0003414	0.0002755	0.0005361	0.000561949	0.000223662	0.00023498	0	0	0	0	0	0
70	0.0003012	0.0004768	0.00053607	0.000502008	8.60237e-05	0.0004259	0	0	0	0	0	0
75	0.000251	0.0003815	0.0004084	0.000659354	0.000283878	0.000359813	0	0	0	0	0	0
80	0.0003715	0.00018014	0.0004978	0.000719295	0.000378504	0.00055073	0	0	0	0	0	0
85	0.0003615	0.0003285	0.000676469	0.000651861	0.000249469	0.000345126	0	0	0	0	0	0
90	0.0006426	0.000339087	0.0007148	0.000539471	0.000249469	0.00046262	0	0	0	0	0	0
95	0.0003815	0.0004133	0.000331853	0.00059192	0.000266674	0.00041121	0	0	0	0	0	0
100	0.0004318	0.00039207	0.0005105	0.000584427	0.000369902	0.000491989	0	0	0	0	0	0
105	0.0004117	0.00036028	0.0006765	0.000726788	0.000559154	0.00056542	0	0	0	0	0	0
110	0.0003514	0.0003815	0.000727523	0.000636876	0.000430119	0.00049933	0	0	0	0	0	0
115	0.0003313	0.0004239	0.0006254	0.000606905	0.000344095	0.0004773	0	0	0	0	0	0
120	0.000492	0.0005934	0.0004212	0.000644369	0.000378504	0.00046996	0	0	0	0	0	0
125	0.0005522	0.0004662	0.0006127	0.000719295	0.00047313	0.00043324	0	0	0	0	0	0
130	0.000502	0.0005298	0.0006765	0.000786729	0.000318288	0.00045527	0	0	0	0	0	0
135	0.0004016	0.0002967	0.0008169	0.000606905	0.000309685	0.00043324	0	0	0	0	0	0
140	0.0005121	0.0003391	0.0006509	0.000726788	0.000404312	0.000491989	0	0	0	0	0	0
145	0.0004217	0.0005404	0.0009317	0.00100402	0.000516142	0.0004773	0	0	0	0	0	0
150	0.000542201	0.0004874	0.000446725	0.000899119	0.000722599	0.00055073	0	0	0	0	0	0
155	0.000451834	0.0004768	0.0004723	0.000801714	0.000524745	0.000528704	0	0	0	0	0	0
160	0.000592405	0.0005934	0.0006127	0.000869148	0.000481733	0.00055073	0	0	0	0	0	0
165	0.000471916	0.0006358	0.000612651	0.000914104	0.000593564	0.000514018	0	0	0	0	0	0
170	0.000512079	0.0007947	0.0007531	0.000801714	0.000696792	0.00038919	0	0	0	0	0	0
175	0.000471916	0.0006358	0.000778578	0.00070431	0.000455926	0.00051402	0	0	0	0	0	0
180	0.000502	0.0005934	0.0004978	0.000726788	0.000541949	0.00054339	0	0	0	0	0	0
185	0.000743	0.0006252	0.0007531	0.000771744	0.000490335	0.00056542	0	0	0	0	0	0
190	0.0003313	0.0005828	0.000587124	0.00073428	0.000662383	0.00052136	0	0	0	0	0	0.000124719
195	0.000371508	0.000657	0.0007658	0.000786729	0.000713997	0.000558077	0	0	0	0	0	0.000259832
200	0.0004318	0.0008583	0.0008169	0.000801714	0.000550552	0.000609478	0	0	0	0	0	0
205	0.000461875	0.0008371	0.000650942	0.000786729	0.000645178	0.00054339	0	0	0	0	0	0
210	0.0004117	0.0008053	0.000740287	0.000771744	0.000670985	0.000521361	4.84018e-05	0	0	0	0	0
215	0.000502	0.0006888	0.0007786	0.00073428	0.000662383	0.000616822	0	0	0	0	0	0.000187079
220	0.000502038	0.000551	0.000765814	0.000861656	0.000696792	0.00054339	0.000125845	0	0	0	0	0.000114326
225	0.000612487	0.0007206	0.00075305	0.000906612	0.000516142	0.00049933	0	0	0	0	0	0.000124719
230	0.0004016	0.0007629	0.00075305	0.000689324	0.000645178	0.00059479	9.68e-06	0	0	0	0	6.23597e-05
235	0.000582364	0.0007418	0.0010721	0.000869148	0.000576359	0.000602135	0	0	0	0	0	7.2753e-05
240	0.000512079	0.0007841	0.0005999	0.000681832	0.000739804	0.00065354	0	0	0	0	0	0
245	0.0004619	0.0009749	0.000638178	0.000749266	0.000705395	0.00065354	0	0	0	0	0	0
250	0.0005221	0.0007418	0.0009573	0.000711802	0.000636576	0.00055073	6.77625e-05	0	0	0	0	0
255	0.000431753	0.0008159	0.0008552	0.000711802	0.000774214	0.00064619	9.68e-06	0	0	0	0	0.000228652
260	0.0005522	0.0008053	0.0010338	0.00070431	0.000808623	0.00055808	3.87214e-05	0	0	0	0	8.31463e-05
265	0.0004719	0.0008371	0.0009828	0.000681832	0.000619371	0.00068291	0	0	0	0	0	7.2753e-05
270	0.0005221	0.0008583	0.0010721	0.000801714	0.000610768	0.00061682	0.0001839	0	0	0	0	0
275	0.0005422	0.0007418	0.0010083	0.000996523	0.000662383	0.00048465	0	0	0	0	0	0
280	0.0005422	0.0009219	0.0009062	0.000996523	0.000808623	0.00055808	0	0	0	0	0	0
285	0.0004016	0.0009855	0.0009573	0.000929089	0.000705395	0.00072697	0.00027105	0	0	0	0	1.03933e-05
290	0.000461875	0.0009855	0.0008169	0.0008167	0.000808623	0.00060948	0.000106484	0	0	0	0	0.00014551
295	0.0003815	0.0009855	0.0011487	0.000764251	0.000713997	0.00053605	0.0001936	0	0	0	0	0.000270225
300	0.0004619	0.0012504	0.0007658	0.000794222	0.000903249	0.00054339	0.0003291	0	0	0	0	0.000124719
305	0.000492	0.0009431	0.0008296	0.000771744	0.000791418	0.00064619	0	0	0	0	0	0.000166293
310	0.0006125	0.0010914	0.0007913	0.000786729	0.000817225	0.00079306	0.000367853	0	0	0	0	0.000353372
315	0.0005322	0.0010385	0.0009956	0.000771744	0.000903249	0.00058011	0.0002807	0	0	0	0	0.00020787
320	0.000492	0.0011338	0.0009317	0.00084667	0.000662383	0.00068291	0	0.0003254	0	0	0	0.000311798
325	0.0004719	0.0011974	0.0008424	0.000674339	0.000679587	0.00066088	0.0002323	0	0	0	0	0
330	0.0006024	0.0010491	0.0009828	0.000884134	0.00105809	0.000822429	0.0002904	0	0	0	0	0.000281
335	0.0004418	0.0011444	0.001136	0.000884134	0.00086884	0.00077837	0.000619543	0	0	0	0	0
340	0.0005623	0.0010914	0.000842395	0.000681832	0.000765611	0.00093258	0.000222648	0	0	0	0	0.000197
345	0.0004117	0.001155	0.0010721	0.000861656	0.000877442	0.000726968	0.000474337	0	0	0	0	0.000437
350	0.000482	0.0010596	0.0010721	0.000831685	0.000946261	0.000844458	0.000454977	0	0	0	0	0.000197

## Sheet: but acid
Time (mins)	NTG	NTG.1	NTG.2	NTG.3	NTG.4	NTG.5	TG	TG.1	TG.2	TG.3	TG.4	TG.5
0	2.12159e-05	0.000263315	0.000394957	0.000331337	0.000167909	0.000262225	0	0	0	0	0	0
5	0.00036067	0.000454817	0.000523052	0.000387907	0.000218282	0.000262225	0	0	0	0	0	0
10	0.000519789	0.00039497	0.000394957	0.000509128	0.000361005	0.000410439	0	0	0	0	0	0
15	0.000572829	0.00043088	0.000491028	0.000541454	0.000285446	0.000302129	0	0	0	0	0	0
20	0.000265199	0.000406942	0.000544401	0.00075157	0.000251864	0.000404738	0	0	0	0	0	0
25	0.000297022	0.000371035	0.000416306	0.000339419	0.000344214	0.000364835	0	0	0	0	0	0
30	0.00038189	0.00028725	0.000555075	0.000549535	0.000335818	0.00044464	0	0	0	0	0	0
35	0.00030763	0.000490724	0.000426981	0.000573779	0.000361005	0.000661263	0	0	0	0	0	0
40	0.000265199	0.0001556	0.00052305	0.000557616	0.000251864	0.000695466	0	0	0	0	0	0
45	0.000265199	0.00010772	0.000501703	0.000662674	0.000411378	0.00059286	0	0	0	0	0	0
50	0.00029702	0.00021544	0.000587099	0.000598023	0.000285446	0.00086078	0	0	0	0	0	0
55	0.0004031	0.00020347	0.00048035	0.000533372	0.000419773	0.00094059	0	0	0	0	0	0
60	0.000286414	0.00013166	0.00044833	0.000767733	0.000293841	0.000655562	0	0	0	0	0	0
65	0.00023337	0.00027528	0.00048035	0.000630349	0.000570891	0.00074677	0	0	0	0	0	0
70	0.00031824	0.00025135	0.000544401	0.000614186	0.000310632	0.00077527	0	0	0	0	0	0
75	0.0002652	0.00021544	0.00053373	0.000662674	0.000579287	0.00074107	0	0	0	0	0	0
80	0.00032885	0.000131658	0.00067249	0.000630349	0.000545705	0.00094059	0	0	0	0	0	0
85	0.00031824	0.00026332	0.000597773	0.00046064	0.000419773	0.000832279	0	0	0	0	0	0
90	0.00045614	0.000418911	0.0005017	0.000557616	0.000545705	0.00082088	0	0	0	0	0	0
95	0.00030763	0.00017953	0.000405632	0.000565698	0.000562496	0.00081518	0	0	0	0	0	0
100	0.00020155	0.000335129	0.00055508	0.00058186	0.00046175	0.000860781	0	0	0	0	0	0
105	0.00033945	0.000371035	0.00056575	0.000686919	0.000596078	0.00100329	0	0	0	0	0	0
110	0.00014851	0.00043088	0.000544401	0.000614186	0.000495332	0.00090069	0	0	0	0	0	1.0712e-05
115	0.00022277	0.00037104	0.00055508	0.000484884	0.000411378	0.00088358	0	0	0	0	0	0.000235662
120	0.0002652	0.00041891	0.00048035	0.000476802	0.000596078	0.00091209	0	0	0	0	0	0
125	0.0002652	0.0003471	0.00051238	0.000557616	0.000562496	0.00096909	0	0	0	0	0	0
130	0.00024398	0.00056254	0.00059777	0.000533372	0.000537309	0.00083228	0	0	0	0	0	6.42715e-05
135	0.00042432	0.00029922	0.00068317	0.000412151	0.000453355	0.00096909	0	0	0	0	0	2.14238e-05
140	0.00022277	0.00045482	0.00057642	0.000492965	0.000545705	0.000894985	0	0	0	0	0	0.000214238
145	0.0001273	0.0005386	0.00065115	0.000598023	0.000604473	0.00093489	0	0	0	0	0	0.000310645
150	0.000190943	0.00058648	0.000533726	0.000557616	0.00090671	0.0010261	0	6.37288e-05	0	0	0	0
155	0.000127295	0.00043088	0.00055508	0.000573779	0.000562496	0.000957691	0	0	0	0	0	0.000353493
160	0.000243983	0.00052663	0.00057642	0.000355581	0.000621264	0.0010261	0	0	0	0	0	0.00019281
165	0.000148511	0.00064632	0.000704519	0.000525291	0.000579287	0.0010318	0	0	0	0	0	0.00048204
170	0.000159119	0.00075404	0.00056575	0.000476802	0.000881523	0.00093489	0	0.000223051	0	0	0	0.000524884
175	0.000212159	0.00061041	0.000523052	0.000420233	0.000520519	0.00096339	0	0.00043017	0	0	0	0.00055702
180	0.00024398	0.00070616	0.00041631	0.0003475	0.000654846	0.000934888	0	0	0	0	0	0.00051417
185	0.00027581	0.00056254	0.00059777	0.000420233	0.000604473	0.0010204	0	0.00022305	0	0	0	0.000407053
190	6.3648e-05	0.00062238	0.000651146	0.000331337	0.000847941	0.00093489	0	0.00092407	0	0	0	0.000417765
195	4.24318e-05	0.00067026	0.00051238	0.000412151	0.000696823	0.0010489	0	0	0	0	0	0.000942648
200	0.00029702	0.00078995	0.00052305	0.000355581	0.000562496	0.0010204	0	0	0	0	0	0.000546308
205	0.000201551	0.0007301	0.000480354	0.000363663	0.000579287	0.00096909	0	0.000318644	0	0	0	0.000246374
210	2.1216e-05	0.00065829	0.000651146	0.000395988	0.000654846	0.00095199	0	0	0	0	0	0.000599867
215	0.00011669	0.00067026	0.00052305	0.000282849	0.00072201	0.000974792	0	0	0	0	0	0.000803394
220	2.12159e-05	0.00076601	0.000512377	0.000323256	0.000805964	0.000986193	0.0001317	0.00050983	0	0	0	0.000792682
225	1.06079e-05	0.00067026	0.000373608	0.0003475	0.000680032	0.00095199	0	0.00050983	0	0	0	0.000578443
230	0.00010608	0.00082585	0.000469679	0.00011314	0.000755591	0.001009	1.317e-05	0.00023898	0	0	0	0.000867665
235	7.42556e-05	0.00083782	0.00051238	0.000379826	0.000663241	0.000980493	0	0	0	0	0	0.000878377
240	0	0.00074207	0.00053373	0.000153547	0.000747196	0.00100329	0	6.3729e-05	0	0	0	0.00087838
245	0	0.00084979	0.000309561	0.000177791	0.000713614	0.00096909	0	4.7797e-05	0	0	0	0.000589155
250	4.2432e-05	0.00098145	0.00044833	6.46512e-05	0.000772382	0.00095769	0	0.000254915	0	0	0	0.00050346
255	7.42556e-05	0.00077798	0.00039496	0.000210116	0.000705219	0.0011002	0.0001317	0.000270847	0	0	0	0.000974784
260	0	0.00080192	0.00038428	0.000129302	0.000864732	0.00096339	0	0.00103559	0	0	0	0.00095336
265	2.1216e-05	0.00083782	0.0005017	0.000129302	0.0005541	0.00099189	0	0	0	0	0	0.00100692
270	0	0.00093357	0.00057642	0.000137384	0.000621264	0.00095769	0.0001317	0.000908135	0	0	0	0.000642715
275	6.36476e-05	0.00090963	0.00039496	0.000299012	0.00064645	0.00092349	0	0.00043017	0	0	0	0.000739122
280	0	0.00104129	0.00043766	0.000299012	0.00081436	0.00094629	0	0.00057356	0	0	0	0.000835529
285	0	0.00111311	0.00044833	0.000250523	0.000789173	0.0010603	0.000329251	1.5932e-05	0	0	0	0.000846241
290	0	0.00093357	0.00033091	0.000129302	0.000688428	0.00095199	0	0.000764745	0	0	0	0.00088909
295	0	0.00111311	0.0005444	0.000121221	0.000596078	0.00099759	6.585e-05	0.00052576	0	0	0	0.00124258
300	0	0.00119689	0.00044833	0	0.000931896	0.00095199	0.00028974	0.00043017	0	0	0	0.000996208
305	0	0.00095751	0.00034158	5.65698e-05	0.000847941	0.00098049	0	0.000175254	0	0	0	0.0011676
310	0	0.00098145	0.00043766	2.42442e-05	0.00064645	0.001009	0.000421441	0.00074881	0	0	8.20452e-05	0.00107119
315	0	0.00120886	0.00051238	3.23256e-05	0.000705219	0.00098049	0.0002634	0.00062136	0	0	3.28181e-05	0.00121045
320	0	0.00120886	0.00049103	0.00011314	0.000570891	0.000974792	0	0.00154542	0	0	0	0.00115689
325	0	0.00131658	0.00057642	0	0.000537309	0.00097479	0.00019755	0.00100373	0	0	0	0.00072841
330	0	0.00104129	0.00043766	3.23256e-05	0.000856337	0.000997594	0.00023706	0.00066915	0	0	0	0.000996
335	0	0.00132855	0.00046968	0	0.000847941	0.0010147	0.000487291	0.00081254	0	0	0	0.000868
340	0	0.00123279	0.000320236	0	0.00072201	0.0010489	2.63401e-05	0.000908135	0	0	0	0.001842
345	0	0.00116098	0.00041631	8.0814e-06	0.000805964	0.0010774	0.000408271	0.000955932	0	0	0	0.001575
350	0	0.00112507	0.00038428	0	0.000747196	0.00111731	0.000421441	0.000414237	0	0	0	0.001135

## Sheet: Citric Acid
Time (mins)	NTG	NTG.1	NTG.2	NTG.3	NTG.4	NTG.5	TG	TG.1	TG.2	TG.3	TG.4	TG.5
0	0.000252259	0.00013678	0.000285889	0.000261131	0	7.46882e-05	0	0	0	0.000399912	0	0
5	0.000603229	0.000560799	0.000987616	0.000509205	0.000185536	0.00042679	0	0	0	0.0001379	0	0
10	0.000636132	0.0003693	0.000636752	0.000548374	0.000148429	0.000704203	0	0	0	0.00030338	0	0
15	0.00128323	0.000533443	0.000870661	0.000326413	0.000315411	0.00040545	0	0	0	0.000386122	0	0
20	0.00112968	0.0005471	0.000935636	0.00097924	0.000306134	0.000725542	0	0	0	0.000537812	0	0
25	0.000504519	0.000506087	0.000818682	0.000665883	0.000380348	0.000522817	0	0	0	0.000413702	0	0
30	0.0007568	0.0004924	0.00114356	0.000456979	0.000315411	0.00083224	0	0	0	0.000661923	0	0
35	0.000976134	0.000478731	0.000909646	0.000927014	0.000398902	0.000981616	0	0	0	0.000413702	0.00015169	0
40	0.000669036	0.0005882	0.0006368	0.000940071	0.000417455	0.00117367	0	0	0	0.000620553	0	6.27983e-05
45	0.000603229	0.000574477	0.00115655	0.000796449	0.000398902	0.0009176	0	0	0	0.000854984	0	0
50	0.0008336	0.0004514	0.000987616	0.000652827	0.000482393	0.001163	0	0	0	0.000455072	0	4.7099e-05
55	0.0012394	0.000766	0.0009356	0.000626714	0.000630821	0.00140841	0	0	0	0.000882564	0	0.0001413
60	0.00118452	0.0003146	0.0010136	0.00104452	0.0005195	0.000714873	0	0	2.39309e-05	0.000772243	0	1.56996e-05
65	0.0008006	0.0006429	0.0009746	0.000744222	0.000742143	0.00066152	0	0	0.000239309	0.00064813	0	0
70	0.0007239	0.0007386	0.00120853	0.000796449	0.000398902	0.00084291	0	0	0	0.000896354	0.000333718	0.0001256
75	0.0007348	0.0006565	0.0009226	0.0011098	0.000612268	0.000874919	0.000441458	0	0	0.000689503	0	0.000109897
80	0.0008994	0.000191492	0.0010916	0.000900901	0.000797803	0.00115233	0	0.00019548	0	0.000717083	0	0.00025119
85	0.0010858	0.0007523	0.00100061	0.000900901	0.000630821	0.000693533	0	0	5.98272e-05	0.000648133	0	6.27983e-05
90	0.0012942	0.000683901	0.0013515	0.000548374	0.000936955	0.00099229	0	0	0	0.00073087	0	0.000219794
95	0.0010748	0.0006155	0.000805687	0.000561431	0.000621544	0.00085358	0	0	0	0.000510232	0	0.00031399
100	0.0009981	0.000506087	0.0011825	0.000665883	0.000760696	0.00106697	0.000261605	0	0	0.000923934	0.000273042	0.00025119
105	0.0008116	0.000588155	0.0012735	0.000992297	0.00113177	0.00088559	0	1.9548e-05	0	0.000372332	0	0
110	0.0007787	0.0005334	0.00132548	0.000757279	0.000881294	0.00094961	0.000261605	0	5.983e-05	0.000524022	3.0338e-05	0.00048669
115	0.0007239	0.0007523	0.0011046	0.000587544	0.000816357	0.00078956	0	0	0	0.000717083	0	0.000533785
120	0.0007677	0.0009301	0.0012085	0.000535318	0.000742143	0.00113099	0	0	0	0.000468862	0	0.000125597
125	0.0009652	0.0006429	0.0013255	0.000665883	0.00106683	0.00098162	0	0	0	0.000675713	0	0.00021979
130	0.0008445	0.0005608	0.0011566	0.000548374	0.001039	0.0009176	0	0	0	0.000551602	0	0.000470987
135	0.0008665	0.0005061	0.0015724	0.000705053	0.00083491	0.00088559	0.000784814	0	0	0.000827404	0.000515745	0.000502386
140	0.0008226	0.0003967	0.0012475	0.000600601	0.000964785	0.000874919	0	0	2.39309e-05	0.000744663	0	0.000549485
145	0.0007897	0.0005334	0.0014554	0.00112286	0.00111321	0.00107764	0	0	0	0.000786033	0	0.000455288
150	0.000855488	0.0008344	0.00100061	0.00121426	0.00125237	0.00115233	0.0002943	0.000254125	0	0.000744663	0	0.000596584
155	0.000888392	0.0003693	0.0010266	0.000770336	0.00109466	0.0010563	0.0003597	3.91e-05	0.000143585	0.000786033	9.10139e-05	0.000565185
160	0.000976134	0.000766	0.0012085	0.000770336	0.000936955	0.00112032	0.000506859	0	0	0.000717083	0.000515745	0.00070648
165	0.0008116	0.0008207	0.00113056	0.000887844	0.00136369	0.00119501	0	0	0	0.000689503	0.00018203	0.00084778
170	0.00108581	0.0010259	0.0013125	0.000535318	0.0012802	0.00098162	1.635e-05	0	0.00013162	0.000551602	0.000182028	0.000816378
175	0.000910327	0.0007386	0.00141645	0.000718109	0.000992616	0.00125903	0	0.0001173	0.000490583	0.000758453	0	0.000910575
180	0.001009	0.0006018	0.0011695	0.000404753	0.000974062	0.000981616	0.0004742	0	0	0.000868774	0.00019214	0.00094197
185	0.001009	0.0009301	0.0014294	0.000561431	0.000751419	0.00117367	3.27e-05	0.0002737	0	0.000827404	0.00015169	0.000690781
190	0.0008884	0.0007523	0.00126051	0.00037864	0.00110394	0.00098162	0.000179853	0.0006646	0	0.00104805	0.000222478	0.000941974
195	0.0009323	0.0007249	0.0013255	0.000470035	0.00113177	0.00103497	9.81e-05	0.000117288	0	0.000565392	0.000465182	0.000910575
200	0.0009323	0.0010669	0.0013775	0.000496148	0.00120598	0.00101362	0	0	2.39309e-05	0.000758453	0.00015169	0.000941974
205	0.000866456	0.0010806	0.00132548	0.000587544	0.0012802	0.00110965	0.0001308	9.774e-05	0	0.000661923	0	0.000784979
210	0.0007458	0.0009985	0.00141645	0.000483092	0.00125237	0.00104563	0.000523209	0	0	0.000468862	0.00010113	0.00073788
215	0.001009	0.0006429	0.0015724	0.000143622	0.00102045	0.00108831	0.000605	0	0	0.000496442	0.000768562	0.000847777
220	0.000943231	0.0007523	0.00167635	0.00067894	0.00125237	0.00110965	0.000899266	3.91e-05	7.17927e-05	0.000799823	0.000141577	0.000879176
225	0.000965166	0.0010122	0.00146843	0.000522261	0.00111321	0.00098162	0.0004251	0.000215	0	0.000758453	0.000313492	0.00108327
230	0.0009323	0.0007796	0.00131249	0.000221961	0.00125237	0.00102429	0.0008012	0	0.000155551	0.000675713	2.02253e-05	0.00103617
235	0.0008994	0.0009164	0.0016374	0.0003003	0.00115032	0.00109898	0.000523209	0	0	0.000592973	0.000242704	0.000957674
240	0.000855488	0.0010532	0.0013905	0.000169735	0.00104828	0.0012697	0.0002453	0	0.00013162	0.000344752	0	0.00105187
245	0.0008665	0.0009301	0.00142944	1.30565e-05	0.00134513	0.00110965	0	0	7.179e-05	0.000661923	0.00015169	0.00100477
250	0.0008665	0.0009575	0.0022221	6.52827e-05	0.00121526	0.00115233	0.000899266	0	0	0.000551602	0.000333718	0.00106757
255	0.0008336	0.0009711	0.0015724	0.000261131	0.0012802	0.00132305	0.0005559	3.91e-05	0.000239309	0.00066192	0.000515745	0.000957674
260	0.0008994	0.0007933	0.0021052	0	0.00151212	0.00109898	0.0004578	0.000449605	2.393e-05	0.000482652	0.000434844	0.000926275
265	0.0008774	0.0011216	0.0019752	5.22261e-05	0.00111321	0.00112032	0	0	0	0.000730873	0.000697773	0.00105187
270	0.0007677	0.0009438	0.0019103	0.000182791	0.00118743	0.00118434	0.000654	0.000351865	5.98272e-05	0.000524022	0.000707886	0.000894876
275	0.0009871	0.0007113	0.0020402	0.000718109	0.00113177	0.00089626	0	0.0001759	0.000191447	0.000675713	0.000778674	0.00122457
280	0.0008226	0.001149	0.0017023	0.000796449	0.00148428	0.00109898	0.0004251	0.0002932	0.000215378	0.000413702	0.000809012	0.00108327
285	0.0008336	0.001149	0.0018323	0.000365583	0.0013173	0.00128037	0.000752113	0	0	0.000799823	0.000171915	0.00119317
290	0.000965166	0.0010669	0.0016893	0.000248074	0.00140079	0.00107764	0.0006704	0.000234577	0.00026324	0.000565392	0.000414619	0.00102047
295	0.0009761	0.00119	0.0018713	0	0.0014379	0.00100296	0.0006213	0.0004105	0.000442721	0.000275801	0.000232591	0.00139726
300	0.0007677	0.0012447	0.0015984	5.22261e-05	0.00133586	0.00098162	0.0008012	0.0001173	0.000191447	0.000620553	0.000900026	0.00117747
305	0.0008665	0.0012994	0.0016634	0.000287244	0.00146573	0.00125903	0.0003597	3.91e-05	0.000191447	0.000317171	0.000444957	0.00119317
310	0.0008994	0.0010806	0.0017023	0	0.0014379	0.00140841	0.000964667	0.0003323	0.000370929	0.000537812	0.000768562	0.00138156
315	0.0008445	0.0011353	0.0018323	5.22261e-05	0.00150284	0.00093894	0.0008175	0.0002346	0.0002154	0.000730873	0.000525858	0.00130306
320	0.0008006	0.0011763	0.0020792	0.00022196	0.00127092	0.00115233	0.0002943	0.0011338	4.78618e-05	0.000317171	0.000232591	0.00127166
325	0.0009103	0.0012994	0.0017153	0	0.00112249	0.0010563	0.0006377	0.0005278	0.000227343	0.000441282	0.000637097	0.00125597
330	0.0008884	0.0011079	0.0017803	0.000522261	0.00150284	0.00135506	0.0006377	0.0001759	0	0.000413702	0.000434844	0.000895
335	0.0008445	0.0010669	0.0021312	0.000522261	0.00129875	0.00109898	0.00158598	0.0003519	0.000382894	0.000510232	0.000364056	0.001413
340	0.0009103	0.0009164	0.00159838	0	0.00149356	0.00148309	0.0006213	0.000469153	0.0002752	0.000537812	0.000414619	0.002135
345	0.0008774	0.0012447	0.0019103	0.000130565	0.00161416	0.00121635	0.000703062	0.000645086	5.983e-05	5.51602e-05	0.000465182	0.00146
350	0.0008226	0.0012037	0.0019882	0	0.00152139	0.00141907	0.000915616	3.90961e-05	0.0002752	0.000455072	0.00049552	0.00157

## Sheet: dextrin
Time (mins)	NTG	NTG.1	NTG.2	NTG.3	NTG.4	NTG.5	TG	TG.1	TG.2	TG.3	TG.4	TG.5
0	2.07e-05	1.11226e-05	0.000139	6.5028e-05	8.82344e-05	0.000201673	0	0	0	0	0	0
5	7.25e-05	0.000189	0.000299	7.80336e-05	0.000208554	0.000137987	0	0	0	0	0	0
10	0.000228	0.0001	0.000203	0.000312134	0.000176469	0.000286588	0	0	0	0	0	0
15	6.21e-05	0.000133	7.47e-05	1.30056e-05	0.000224597	5.30718e-05	0	0	0	0	0	0
20	4.14e-05	0.000145	3.2e-05	0.000312134	0.000168447	0.00024413	0	0	0	0	0	0
25	0.000104	0.000145	6.4e-05	0.000195084	8.82344e-05	7.43005e-05	0	0	0	0	0	0
30	0.000186	0	0.000107	0.000143062	0.000128341	0.00015922	0	0	0	0	0	0
35	8.28e-05	5.56e-05	0.000107	0.000260112	0.000152405	0.000275973	0	0	0	0	0	0
40	1.04e-05	0.000211	0.000139	0.000195084	9.62557e-05	0.000339659	0	0	0	0	0	0
45	1.04e-05	3.34e-05	8.54e-05	0.000169073	0.00036898	0.00027597	0	0	0	0	0	0
50	0	0.0002	0.000235	0.000299129	0.000224597	0.00039273	0	0	0	0	0	0
55	0	0.000156	0.00016	0.000156067	0.000208554	0.00057318	0	0	0	0	0	0
60	0.000155	0.000222	0.000192	0.000377162	0.000136362	0.000392731	0	0	2.16e-05	0	0	0
65	0.000135	0.000156	0.000288	0.000312134	0.00018449	0.00033966	0	0	0	0	0	0
70	0.000217	0.000334	0.000224	0.000247106	0.000104277	0.00048826	0	0	0	0	0	0
75	0.000135	0.000334	0.000181	0.000364157	0.000264703	0.000392731	0.000112	0	0	0	0	0
80	0.00029	0.000189	0.000256	0.000585252	0.00030481	0.00047765	0	1.51e-05	0	0	0	0
85	0.000186	0.000211	0.000437	0.000351151	0.000232618	0.000403346	0	0	0	0	0	0
90	0.000228	0.000289	0.000277	0.000390168	0.00030481	0.0004458	0	0	0	0	0	0
95	0.000238	0.000267	0.000149	0.000403173	0.000320852	0.00030782	0	0	0	0	0	0
100	0.000166	0.000345	0.000363	0.000390168	0.000320852	0.000456417	1.24e-05	0	0	0	0	0
105	0.000238	0.000378	0.000277	0.000520224	0.000377001	0.00046703	0	1.51e-05	0	0	0	0
110	0.0003	0.000267	0.000416	0.00055924	0.000256682	0.00053072	0	0	0.000119	0	0	0
115	0.000217	0.000178	0.000363	0.000507218	0.000176469	0.0005944	0	0	0	0	0	0.00017043
120	0.00029	0.000423	0.000352	0.000377162	0.000208554	0.00042457	0	0	0	0	0	0.000272693
125	0.000321	0.000356	0.000192	0.000702302	0.00024866	0.00049887	0	0	0	0	0	0
130	0.0003	0.000389	0.000309	0.000663285	0.000417108	0.00046703	0	6.04e-05	0	0	0	0
135	0.00029	0.000278	0.000427	0.000702302	0.000168447	0.00049887	3.73e-05	0	0	0	0	0
140	0.000248	0.000323	0.000448	0.000520224	0.000232618	0.000360888	0	6.04e-05	0	0	0	0
145	0.000342	0.000467	0.000427	0.000728313	0.000360959	0.00043519	0	0	0	0	0	0
150	0.000155	0.000378	0.000277	0.000702302	0.000360959	0.00054133	0	6.04e-05	0	0	0	0
155	0.000217	0.000334	0.000299	0.000728313	0.000272724	0.000636862	0	0	0	0	0	0
160	0.0003	0.000456	0.000288	0.000689296	0.000352937	0.00054133	1.24e-05	0	0	0	0	0.00020452
165	0.000393	0.000467	0.000352	0.000806347	0.000312831	0.00058379	0	0	0	0	0	0
170	0.000311	0.000601	0.000341	0.000845364	0.000385023	0.00046703	0	7.55e-05	5.41e-05	0	0	0
175	0.000362	0.000434	0.000427	0.000481207	0.000256682	0.00058379	0	0.000227	0	0	0	0.000170433
180	0.000238	0.000456	0.000288	0.00055924	0.000288767	0.000594404	0	0	0	0	0	6.81733e-05
185	0.000455	0.000556	0.000502	0.000598257	0.000312831	0.00068993	0	0	0	0	0	0.00020452
190	0.000217	0.000311	0.000331	0.000533229	0.00061764	0.0005944	0	0.000513	0	0	0	0
195	0.000352	0.000189	0.00032	0.000663285	0.000377001	0.000551947	0	0	0	0	0	0.00040904
200	0.000352	0.000601	0.000363	0.000728313	0.000296788	0.000689933	0	0	0	0	0	0.000630603
205	0.000352	0.000378	0.00032	0.000780336	0.000264703	0.00056256	0	0	0	0	0	0
210	0.000269	0.000412	0.000363	0.000949408	0.000481278	0.000721776	0	0	0	0	0	0
215	0.000455	0.000389	0.000395	0.000845364	0.000328873	0.000541332	0	0	0	0	0	0
220	0.000424	0.000378	0.000224	0.000715308	0.000457214	0.00065809	0.000124	0	0	0	0	5.113e-05
225	0.000321	0.000356	0.000469	0.000715308	0.000336895	0.00065809	0	0	0	0	0	0
230	0.000352	0.0004	0.000341	0.000455196	0.000481278	0.0006687	0	0	1.08e-05	0	0	0
235	0.000476	0.000512	0.000576	0.000845364	0.000441172	0.000647476	0	0	0	0	0	0
240	0.000373	0.000456	0.000341	0.000520224	0.000425129	0.00056256	0	0	0	0	0	0.000374953
245	0.000383	0.000356	0.000309	0.000910391	0.000417108	0.00068993	0	0	0	0	0	6.8173e-05
250	0.000414	0.000478	0.00032	0.000533229	0.000401065	0.00057318	0	0	0	0	0	0
255	0.000352	0.000356	0.000363	0.000689296	0.000360959	0.00074301	0	0	8.66e-05	0	0	0
260	0.000445	0.000478	0.00032	0.000676291	0.000465236	0.00071116	0	0.000211	0	0	0	6.81733e-05
265	0.000362	0.000445	0.000373	0.000676291	0.000360959	0.00073239	0	0	0	0	0	0
270	0.000321	0.000434	0.000352	0.00076733	0.000401065	0.00063686	0	4.53e-05	2.16e-05	0	0	0.000119303
275	0.000466	0.000412	0.000427	0.000910391	0.000352937	0.00063686	0	0	0	0	0	0
280	0.000466	0.000434	0.000309	0.000988425	0.000513363	0.00087038	0	0	0.000129853	0	1.89023e-05	0
285	0.000414	0.000434	0.000288	0.000988425	0.000393044	0.00076423	4.98e-05	0	0	1.0325e-05	0.000103963	0
290	0.000476	0.000534	0.000395	0.000949408	0.000441172	0.00078546	0	9.06e-05	1.08211e-05	0	0	0.000119303
295	0.000455	0.000534	0.00048	0.000936403	0.000377001	0.00083853	0	0	0	0	0	0
300	0.000352	0.000512	0.000288	0.000832358	0.00055347	0.00068993	0	0	7.57477e-05	0	0	0.000494256
305	0.000383	0.000489	0.000341	0.000793341	0.000401065	0.00077485	0	0	0.000108	0	0	0
310	0.000538	0.000412	0.000181	0.000780336	0.000377001	0.00082792	0	0	7.57477e-05	0	0	0.000323823
315	0.000487	0.000556	0.000448	0.000754324	0.00043315	0.00080669	0	0	0	5.16252e-05	0	0.000477213
320	0.000414	0.000556	0.000331	0.00080635	0.000352937	0.000955292	0	0.000559	0	2.06501e-05	0	0.00028974
325	0.000487	0.00069	0.000384	0.000663285	0.000320852	0.00082792	0	0.000227	1.08211e-05	0	0	0
330	0.000466	0.000567	0.000373	0.000832358	0.000481278	0.000965907	0	0	0	0	0	0
335	0.000487	0.000501	0.000373	0.000715308	0.000497321	0.00099775	0	0	0.000151495	0	0	0
340	0.000518	0.000512	9.6e-05	0.000715308	0.000497321	0.00099775	0	0.000136	0	0	0	0
345	0.000549	0.000545	0.00048	0.000832358	0.000457214	0.00105082	4.98e-05	0	0	0	0	0.000273
350	0.000559	0.000345	0.00048	0.000702302	0.000449193	0.000902221	0.000174	0	0	0	0	0.000562

[truncated: 15 more sheets: F-6-P, FRUCTOSE, G-1-P, Gamma-ABA, glucose, Glycerol phosphate, hexanoic acid, inosine, l-malic acid, lactic acid, maltose, mannose, prop acid, Succianmic Acid, Met Flex]
