# Supplementary material for: Hypothesis-free evaluation of circulating metabolome provides cell-specific insights regarding the role of energy substrate availability in amyotrophic lateral sclerosis
Source: Research Square preprint supplement (doi:10.21203/rs.3.rs-7811456/v1), 2025-10-25
Supplement: Supplementary file 2 [file dc1d6e414581a28fb0cbaf29.xlsx]

## Sheet: Description
Tables Descriptions
Supplementary Table 1: Metabolome-wide two-sample Mendelian randomization (MR) screen for circulating metabolites causally linked to ALS risk.
Supplementary Table 2: Comparison of directly measured concentration of carnitines in plasma from ALS patients and controls.
Supplementary Table 3: Comparison of directly measured concentration of selected simple carbohydrates in plasma from ALS patients and controls.
Supplementary Table 4: Cox regression for the relationship between plasma concentration of selected simple carbohydrates and ALS survival time
Supplementary Table 5: Cox regression for the relationship between plasma concentration of selected simple carbohydrates and ALS age of onset
Supplementary Table 6: NADH production by mouse cortical neurons with and without an ALS-associated C9orf72 G4C2-repeat expansion in different energy substrates

## Sheet: Supplementary Table 1
IEU	Name	N	P-value threshold for SNP selection	OR	IVW p-value	IVW Beta	IVW SE	Median P-value	Median Beta	Median SE	MR Egger p-value	MR Egger Beta	MR Egger SE	Mode P-value	Mode Beta	Mode SE	Q	Egger intercept P-value	I2	LOO	Mean F statistic	Radial MR outlier SNPs	Bonforroni adjusted P-value	FDR adjusted P-value
met-c-863	Glycoprotein acetyls	6	5e-08	1.23	9.7e-09	0.21	0.04	0.0226	0.19	0.08	0.143	0.38	0.21	0.127	0.18	0.1	0.9	0.44	0.95	All significant	48.33	1	1e-05	0
met-a-458	DSGEGDFXAEGGGVR*	7	5e-06	1.24	8.01e-06	0.22	0.05	0.187	0.23	0.17	0.985	-0.01	0.48	0.222	0.31	0.23	0.99	0.64	0.94	All significant	21.48	1	0.005	0
met-a-721	X-14208--phenylalanylserine	9	5e-06	0.72	1.61e-05	-0.33	0.08	0.0287	-0.29	0.13	0.14	-0.26	0.16	0.0385	-0.31	0.13	0.68	0.59	0.96	All significant	23.44	1	0.01	0
met-a-573	Isobutyrylcarnitine	9	5e-06	0.75	2.23e-05	-0.29	0.07	0.0927	-0.28	0.17	0.758	-0.08	0.26	0.443	-0.13	0.17	0.97	0.4	0.98	All significant	51.22	1	0.01	0
met-a-463	Acetylcarnitine	8	5e-06	0.49	4.71e-05	-0.72	0.18	0.0123	-0.74	0.3	0.607	-0.31	0.56	0.0571	-0.8	0.35	0.77	0.46	0.97	All significant	35.66		0.03	0.01
met-a-483	Docosapentaenoate (n3 DPA; 22:5n3)	37	5e-05	1.4	0.000207	0.33	0.09	0.00914	0.39	0.15	0.206	0.29	0.23	0.0795	0.45	0.25	0.78	0.83	0.95	All significant	19.39	2	0.12	0.02
met-c-843	Apolipoprotein B	16	5e-08	1.1	0.000283	0.1	0.03	0.000482	0.14	0.04	0.0955	0.1	0.05	0.00593	0.16	0.05	0.66	0.95	0.99	All significant	77.55		0.16	0.02
met-a-719	X-14189--leucylalanine	52	5e-05	1.17	0.000455	0.15	0.04	0.031	0.16	0.07	0.337	0.17	0.18	0.0435	0.37	0.18	0.97	0.91	0.95	All significant	19.82	5	0.26	0.03
met-c-881	Cholesterol esters in large VLDL	20	5e-08	1.09	0.000768	0.09	0.03	0.00463	0.11	0.04	0.175	0.06	0.04	0.0102	0.11	0.04	0.29	0.35	0.99	Not robust	86.86	1	0.44	0.04
met-a-347	Arginine	11	5e-06	0.62	0.000768	-0.48	0.14	0.0611	-0.65	0.35	0.375	-0.74	0.8	0.203	-0.7	0.52	0.99	0.73	0.96	All significant	23.03		0.44	0.04
met-a-360	Gamma-glutamyltyrosine	10	5e-07	0.4	0.000966	-0.91	0.28	0.0597	-0.94	0.5	0.406	-2.51	2.86	0.156	-1.18	0.76	0.85	0.59	0.97	All significant	28.35	2	0.55	0.05
met-a-524	X-11491	9	5e-06	0.77	0.001	-0.26	0.08	0.0364	-0.26	0.12	0.109	-0.35	0.19	0.102	-0.26	0.14	0.7	0.59	0.97	All significant	37.01	1	0.58	0.05
met-c-879	Phospholipids in large HDL	11	5e-08	0.91	0.00114	-0.1	0.03	0.0443	-0.09	0.04	0.715	0.04	0.1	0.16	-0.07	0.05	0.65	0.17	0.99	All significant	93.03	1	0.65	0.05
met-c-934	Serum total triglycerides	11	5e-08	1.1	0.00151	0.09	0.03	0.0373	0.1	0.05	0.204	0.14	0.1	0.0951	0.11	0.06	0.78	0.65	0.98	All significant	87.35		0.87	0.05
met-c-913	Concentration of medium VLDL particles	12	5e-08	1.09	0.0016	0.09	0.03	0.0544	0.1	0.05	0.19	0.12	0.09	0.135	0.1	0.06	0.83	0.69	0.98	All significant	68.98	1	0.92	0.05
met-c-875	Cholesterol esters in large HDL	12	5e-08	0.91	0.00164	-0.09	0.03	0.0449	-0.09	0.05	0.908	0.01	0.08	0.124	-0.08	0.05	0.71	0.22	0.99	All significant	82.11	1	0.94	0.05
met-a-457	N-(2-furoyl)glycine	14	5e-06	1.09	0.00181	0.08	0.03	0.0546	0.1	0.05	0.342	0.07	0.07	0.0958	0.1	0.06	0.9	0.81	0.89	All significant	22.74	3	1	0.05
met-c-876	Free cholesterol in large HDL	14	5e-08	0.91	0.00192	-0.1	0.03	0.0358	-0.1	0.05	0.472	-0.06	0.08	0.105	-0.09	0.05	0.63	0.66	0.99	All significant	75.52	1	1	0.05
met-c-877	Total lipids in large HDL	11	5e-08	0.91	0.00176	-0.09	0.03	0.0364	-0.09	0.04	0.601	0.05	0.09	0.168	-0.07	0.05	0.62	0.14	0.99	All significant	99.67	1	1	0.05
met-c-878	Concentration of large HDL particles	11	5e-08	0.91	0.00181	-0.09	0.03	0.0471	-0.09	0.04	0.604	0.05	0.09	0.173	-0.07	0.04	0.62	0.13	0.99	All significant	99.38	1	1	0.05
met-c-880	Total cholesterol in large LDL	20	5e-08	1.09	0.00185	0.09	0.03	0.00607	0.1	0.04	0.184	0.06	0.04	0.017	0.1	0.04	0.22	0.43	0.99	Not robust	90	1	1	0.05
met-c-911	Free cholesterol in medium VLDL	11	5e-08	1.09	0.00188	0.09	0.03	0.0477	0.1	0.05	0.124	0.15	0.09	0.103	0.11	0.06	0.83	0.46	0.99	All significant	81.81	1	1	0.05
met-c-926	Concentration of small LDL particles	14	5e-08	1.1	0.00193	0.1	0.03	0.000654	0.15	0.04	0.121	0.1	0.06	0.00823	0.16	0.05	0.38	0.98	0.99	Not robust	85.76		1	0.05
met-c-933	Serum total cholesterol	19	5e-08	1.1	0.00189	0.09	0.03	0.000357	0.15	0.04	0.236	0.07	0.06	0.016	0.16	0.06	0.43	0.58	0.98	Not robust	71.64		1	0.05
met-c-924	Total cholesterol in small LDL	13	5e-08	1.1	0.00206	0.09	0.03	0.000724	0.14	0.04	0.202	0.07	0.05	0.00887	0.14	0.04	0.44	0.55	0.99	Not robust	100.54	2	1	0.05
met-c-874	Total cholesterol in large HDL	13	5e-08	0.91	0.00215	-0.1	0.03	0.0436	-0.09	0.05	0.505	-0.06	0.08	0.101	-0.09	0.05	0.57	0.59	0.99	All significant	82.56	1	1	0.05
met-c-883	Total lipids in large LDL	21	5e-08	1.09	0.00232	0.08	0.03	0.00751	0.1	0.04	0.118	0.07	0.04	0.0141	0.1	0.04	0.25	0.74	0.99	Not robust	84.92	1	1	0.05
met-c-914	Phospholipids in medium VLDL	14	5e-08	1.08	0.00233	0.08	0.03	0.0722	0.09	0.05	0.124	0.14	0.08	0.111	0.1	0.06	0.91	0.44	0.98	All significant	70.78	1	1	0.05
met-c-905	Cholesterol esters in medium LDL	18	5e-08	1.09	0.00255	0.09	0.03	0.00948	0.1	0.04	0.198	0.06	0.05	0.0186	0.1	0.04	0.25	0.52	0.99	Not robust	88.87	2	1	0.05
met-c-912	Total lipids in medium VLDL	10	5e-08	1.09	0.00289	0.09	0.03	0.0568	0.1	0.05	0.226	0.12	0.09	0.105	0.11	0.06	0.79	0.75	0.98	All significant	77.19	1	1	0.06
met-c-869	Total lipids in IDL	19	5e-08	1.09	0.00317	0.09	0.03	0.000306	0.14	0.04	0.327	0.05	0.05	0.0176	0.12	0.04	0.15	0.42	0.99	Not robust	88.58		1	0.06
met-c-895	Total cholesterol in LDL	18	5e-08	1.08	0.00326	0.08	0.03	0.00611	0.1	0.04	0.0701	0.08	0.04	0.0122	0.1	0.04	0.39	0.92	0.99	Not robust	97.85	3	1	0.06
met-c-932	Triglycerides in small VLDL	12	5e-08	1.08	0.00311	0.08	0.03	0.0513	0.09	0.05	0.183	0.13	0.09	0.082	0.1	0.05	0.87	0.53	0.99	All significant	85.01	1	1	0.06
met-a-370	X-02973	15	5e-06	0.42	0.00341	-0.86	0.29	0.054	-1.01	0.53	0.456	1.48	1.93	0.235	-1.21	0.97	0.94	0.24	0.96	All significant	22.72		1	0.06
met-c-904	Total cholesterol in medium LDL	17	5e-08	1.08	0.00359	0.08	0.03	0.0082	0.1	0.04	0.0687	0.08	0.04	0.0103	0.12	0.04	0.49	0.89	0.99	Not robust	96.16	2	1	0.06
met-c-844	Ratio of bisallylic groups to double bonds	9	5e-07	0.94	0.00383	-0.06	0.02	0.0867	-0.05	0.03	0.934	0	0.05	0.218	-0.04	0.03	0.77	0.18	0.99	All significant	137.64		1	0.06
met-c-885	Phospholipids in large LDL	18	5e-08	1.08	0.00376	0.08	0.03	0.00645	0.1	0.04	0.0832	0.08	0.04	0.0127	0.12	0.04	0.41	0.92	0.99	Not robust	93.04	1	1	0.06
met-c-867	Total cholesterol in IDL	19	5e-08	1.09	0.00418	0.08	0.03	0.00343	0.11	0.04	0.271	0.06	0.05	0.0192	0.11	0.04	0.16	0.5	0.99	Not robust	89.76		1	0.06
met-c-884	Concentration of large LDL particles	20	5e-08	1.08	0.00408	0.08	0.03	0.0115	0.1	0.04	0.104	0.08	0.04	0.0144	0.1	0.04	0.27	0.96	0.99	Not robust	86.38	1	1	0.06
met-c-927	Total cholesterol in small VLDL	13	5e-08	1.08	0.00403	0.08	0.03	0.0658	0.09	0.05	0.408	0.09	0.1	0.227	0.1	0.08	0.9	0.92	0.99	All significant	77.67		1	0.06
met-c-903	Phospholipids in medium HDL	7	5e-08	0.9	0.00461	-0.11	0.04	0.0483	-0.13	0.07	0.552	-0.08	0.13	0.152	-0.13	0.08	0.81	0.84	0.98	Not robust	55.06		1	0.06
met-c-870	Concentration of IDL particles	17	5e-08	1.08	0.00614	0.08	0.03	0.000578	0.13	0.04	0.125	0.08	0.05	0.0114	0.13	0.05	0.36	0.84	0.99	Not robust	93.01		1	0.08
met-c-871	Phospholipids in IDL	19	5e-08	1.08	0.00625	0.08	0.03	0.00321	0.11	0.04	0.157	0.08	0.05	0.0125	0.13	0.05	0.21	0.9	0.99	Not robust	88.33		1	0.08
met-a-339	4-acetamidobutanoate	11	5e-06	0.39	0.00789	-0.93	0.35	0.0754	-0.87	0.49	0.49	-0.86	1.19	0.109	-1.15	0.65	0.47	0.95	0.93	Not robust	24.42	4	1	0.09
met-a-413	X-06267	6	5e-06	0.43	0.00704	-0.83	0.31	0.0393	-0.99	0.48	0.775	-0.35	1.13	0.239	-0.96	0.72	0.62	0.67	0.96	All significant	23.28	1	1	0.09
met-a-416	X-06351	31	5e-05	0.85	0.00694	-0.16	0.06	0.289	-0.15	0.14	0.207	-0.21	0.16	0.0982	-0.37	0.22	1	0.7	0.95	Not robust	18.51	3	1	0.09
met-a-541	X-11787	14	5e-06	0.66	0.008	-0.41	0.16	0.334	-0.28	0.29	0.934	0.04	0.42	0.333	-0.28	0.28	0.95	0.22	0.99	All significant	81	1	1	0.09
met-c-868	Free cholesterol in IDL	18	5e-08	1.08	0.00789	0.08	0.03	0.000537	0.13	0.04	0.166	0.07	0.05	0.0109	0.12	0.04	0.23	0.89	0.99	Not robust	96.61		1	0.09
met-c-882	Free cholesterol in large LDL	18	5e-08	1.07	0.0076	0.07	0.03	0.00597	0.1	0.03	0.0532	0.09	0.04	0.0194	0.1	0.04	0.35	0.63	0.99	Not robust	99.9		1	0.09
met-c-906	Total lipids in medium LDL	17	5e-08	1.07	0.00771	0.07	0.03	0.0156	0.09	0.04	0.0532	0.09	0.04	0.0126	0.11	0.04	0.42	0.56	0.99	Not robust	90.87	2	1	0.09
met-c-907	Concentration of medium LDL particles	17	5e-08	1.08	0.00814	0.07	0.03	0.0136	0.09	0.04	0.0553	0.09	0.05	0.0102	0.12	0.04	0.41	0.56	0.99	Not robust	88.68	2	1	0.09
met-c-909	Total cholesterol in medium VLDL	13	5e-08	1.08	0.00763	0.08	0.03	0.0511	0.09	0.05	0.225	0.12	0.09	0.0959	0.1	0.06	0.76	0.64	0.99	All significant	79.81	1	1	0.09
met-c-925	Total lipids in small LDL	16	5e-08	1.08	0.00736	0.08	0.03	0.000512	0.15	0.04	0.075	0.1	0.05	0.00932	0.15	0.05	0.34	0.62	0.99	Not robust	83.16	2	1	0.09
met-c-955	Phospholipids in very small VLDL	16	5e-08	1.09	0.00834	0.08	0.03	0.0101	0.11	0.04	0.556	0.04	0.07	0.0499	0.15	0.07	0.18	0.45	0.99	Not robust	90.52		1	0.09
met-c-908	Phospholipids in medium LDL	14	5e-08	1.08	0.00937	0.08	0.03	0.00854	0.11	0.04	0.0575	0.1	0.05	0.0131	0.13	0.05	0.42	0.51	0.99	Not robust	97.34	1	1	0.1
met-a-754	15-methylpalmitate (isobar with 2-methylpalmitate)	9	5e-06	1.92	0.00956	0.65	0.25	0.0378	0.77	0.37	0.179	1.37	0.92	0.0944	0.96	0.51	0.59	0.44	0.92	Not robust	23.2		1	0.1
met-a-715	X-14056	43	5e-05	1.29	0.00978	0.26	0.1	0.398	0.13	0.16	0.892	0.04	0.27	0.851	-0.06	0.32	0.64	0.37	0.95	All significant	18.29	4	1	0.1
met-a-359	Gamma-glutamylglutamine	15	5e-06	0.53	0.0109	-0.64	0.25	0.0121	-0.88	0.35	0.0631	-1.22	0.6	0.0429	-1.04	0.47	0.45	0.31	0.97	Not robust	28.32	1	1	0.11
met-a-659	Gamma-glutamylisoleucine*	12	5e-06	1.83	0.011	0.61	0.24	0.0253	0.74	0.33	0.148	1.18	0.75	0.0929	0.9	0.49	0.44	0.44	0.96	All significant	22.09	3	1	0.11
met-c-930	Concentration of small VLDL particles	15	5e-08	1.07	0.0112	0.07	0.03	0.0404	0.09	0.05	0.203	0.12	0.09	0.0518	0.11	0.05	0.76	0.56	0.99	All significant	74.75		1	0.11
met-a-528	X-11529	38	5e-05	0.91	0.0118	-0.09	0.04	0.142	-0.07	0.05	0.298	-0.05	0.05	0.118	-0.08	0.05	0.48	0.32	0.98	All significant	55.7	3	1	0.11
met-c-860	Glutamine	7	5e-07	0.9	0.0123	-0.1	0.04	0.0785	-0.11	0.06	0.305	-0.11	0.1	0.139	-0.1	0.06	0.68	0.9	0.99	Not robust	73.09		1	0.11
met-c-923	Triglycerides in small HDL	10	5e-08	1.08	0.0126	0.08	0.03	0.0742	0.09	0.05	0.369	0.11	0.11	0.161	0.09	0.06	0.8	0.77	0.98	Not robust	80.62		1	0.11
met-c-929	Total lipids in small VLDL	14	5e-08	1.08	0.0128	0.07	0.03	0.036	0.09	0.05	0.258	0.11	0.09	0.0544	0.12	0.06	0.67	0.67	0.99	All significant	78.15		1	0.11
met-a-323	Isoleucine	11	5e-06	0.32	0.0136	-1.13	0.46	0.058	-1.26	0.66	0.325	-1.35	1.3	0.0426	-2.06	0.89	0.38	0.86	0.95	Not robust	22.72		1	0.12
met-c-931	Phospholipids in small VLDL	13	5e-08	1.08	0.0134	0.08	0.03	0.033	0.1	0.05	0.254	0.12	0.1	0.0706	0.12	0.06	0.61	0.66	0.99	All significant	86.13		1	0.12
met-a-376	Mannitol	6	5e-06	0.82	0.014	-0.2	0.08	0.086	-0.19	0.11	0.667	-0.1	0.22	0.206	-0.2	0.14	0.38	0.65	0.94	Not robust	22.06		1	0.12
met-a-494	X-11299	60	5e-05	1.07	0.0142	0.07	0.03	0.0372	0.1	0.05	0.37	0.09	0.1	0.21	0.13	0.1	0.93	0.84	0.95	All significant	18.27	1	1	0.12
met-a-579	Lathosterol	8	5e-06	1.3	0.0151	0.26	0.11	0.0993	0.32	0.2	0.2	0.35	0.24	0.136	0.37	0.22	0.78	0.68	0.96	Not robust	24.82	1	1	0.13
met-c-910	Cholesterol esters in medium VLDL	14	5e-08	1.07	0.0154	0.07	0.03	0.0534	0.09	0.05	0.358	0.09	0.09	0.0798	0.11	0.06	0.7	0.85	0.98	Not robust	75.96		1	0.13
met-a-455	Cysteine	10	5e-06	1.65	0.0167	0.5	0.21	0.0568	0.53	0.28	0.0795	0.65	0.32	0.0554	0.61	0.28	0.41	0.55	0.96	Not robust	21.68	1	1	0.13
met-a-581	X-12093	7	5e-06	1.11	0.0191	0.1	0.04	0.17	0.11	0.08	0.467	0.11	0.14	0.308	0.1	0.09	0.87	0.94	0.99	Not robust	80.61		1	0.15
met-a-479	Propionylcarnitine	11	5e-07	0.67	0.0232	-0.4	0.18	0.0665	-0.54	0.29	0.569	-0.29	0.49	0.309	-0.46	0.43	0.82	0.79	0.97	Not robust	45.63		1	0.18
met-c-956	Triglycerides in very small VLDL	16	5e-08	1.07	0.0237	0.07	0.03	0.037	0.09	0.04	0.579	0.06	0.1	0.0975	0.11	0.06	0.5	0.88	0.98	Not robust	74.12		1	0.18
met-a-521	X-11478	6	5e-06	0.73	0.0247	-0.31	0.14	0.053	-0.36	0.19	0.0963	-0.49	0.23	0.0787	-0.47	0.21	0.48	0.36	0.96	Not robust	23	1	1	0.19
met-c-857	Omega-7, omega-9 and saturated fatty acids	6	5e-08	1.13	0.0245	0.12	0.05	0.025	0.14	0.06	0.756	-0.1	0.31	0.2	0.14	0.1	0.26	0.51	0.98	Not robust	62.66	1	1	0.19
met-a-745	Chiro-inositol	46	5e-05	0.96	0.0254	-0.04	0.02	0.279	-0.04	0.03	0.442	-0.03	0.04	0.985	0	0.06	0.88	0.82	0.95	Not robust	18.81	1	1	0.19
met-c-890	Concentration of large VLDL particles	9	5e-08	1.09	0.0257	0.09	0.04	0.0643	0.11	0.06	0.167	0.16	0.1	0.11	0.12	0.06	0.55	0.46	0.98	Not robust	70.82	1	1	0.19
met-c-900	Free cholesterol in medium HDL	6	5e-07	0.91	0.0265	-0.09	0.04	0.0713	-0.11	0.06	0.512	-0.09	0.12	0.178	-0.11	0.07	0.69	0.96	0.98	Not robust	67.95		1	0.19
met-a-587	X-12188	8	5e-06	1.08	0.0272	0.07	0.03	0.141	0.08	0.05	0.315	0.08	0.07	0.152	0.08	0.05	0.69	0.93	0.96	Not robust	24.97	1	1	0.19
met-a-308	Phenylalanine	24	5e-05	1.86	0.0294	0.62	0.28	0.378	0.48	0.54	0.61	0.44	0.85	0.692	0.31	0.77	0.96	0.82	0.95	Not robust	18.97	1	1	0.21
met-c-928	Free cholesterol in small VLDL	13	5e-08	1.07	0.0293	0.07	0.03	0.0389	0.1	0.05	0.308	0.11	0.1	0.0572	0.13	0.06	0.52	0.72	0.99	Not robust	85.55		1	0.21
met-a-490	X-11261	6	5e-06	0.78	0.031	-0.24	0.11	0.316	-0.19	0.19	0.425	-0.35	0.39	0.39	-0.22	0.23	0.73	0.79	0.98	Not robust	42.9		1	0.21
met-c-850	Creatinine	14	5e-07	1.13	0.0308	0.12	0.06	0.842	0.02	0.08	0.974	-0.01	0.2	0.82	-0.03	0.12	0.48	0.52	0.94	Not robust	32.38		1	0.21
met-a-386	Phenylacetate	32	5e-05	1.17	0.0326	0.16	0.07	0.0805	0.18	0.1	0.111	0.24	0.15	0.143	0.19	0.13	0.52	0.5	0.95	Not robust	18.43	1	1	0.22
met-a-392	X-04498	14	5e-06	1.27	0.0324	0.24	0.11	0.301	0.26	0.25	0.825	0.1	0.43	0.934	0.03	0.33	0.99	0.72	0.95	Not robust	23.39		1	0.22
met-a-596	X-12244--N-acetylcarnosine	14	5e-06	0.75	0.0355	-0.29	0.14	0.256	-0.3	0.27	0.859	0.13	0.69	0.423	-0.32	0.39	0.94	0.54	0.97	Not robust	36.33		1	0.23
met-a-752	Phenylalanylphenylalanine	22	5e-05	0.83	0.0355	-0.19	0.09	0.327	-0.19	0.2	0.612	0.2	0.39	0.537	-0.17	0.27	0.99	0.3	0.95	Not robust	18.56	1	1	0.23
met-c-859	Glucose	22	5e-06	1.07	0.0349	0.06	0.03	0.562	0.03	0.06	0.285	0.1	0.09	0.637	0.03	0.07	0.97	0.65	0.96	Not robust	31.21	5	1	0.23
met-c-936	Total fatty acids	11	5e-08	1.09	0.0352	0.09	0.04	0.025	0.12	0.05	0.578	0.12	0.21	0.126	0.15	0.09	0.34	0.87	0.98	Not robust	54.11		1	0.23
met-a-614	X-12465	51	5e-05	0.88	0.0393	-0.13	0.06	0.034	-0.2	0.1	0.156	-0.17	0.12	0.177	-0.23	0.16	0.57	0.69	0.94	Not robust	18.38	4	1	0.25
met-a-450	Bilirubin (Z,Z)	6	5e-06	1.13	0.042	0.12	0.06	0.131	0.1	0.07	0.946	0.01	0.11	0.253	0.09	0.07	0.43	0.3	0.99	Not robust	132.27		1	0.26
met-a-717	X-14086	9	5e-06	1.3	0.0417	0.26	0.13	0.228	0.22	0.18	0.962	-0.02	0.46	0.683	0.14	0.33	0.45	0.54	0.97	Not robust	25.61		1	0.26
met-a-305	Histidine	6	5e-06	2.48	0.043	0.91	0.45	0.438	0.61	0.79	0.155	1.86	1.06	0.772	0.33	1.07	0.76	0.33	0.96	Not robust	29.07		1	0.26
met-a-606	X-12428	40	5e-05	0.92	0.0436	-0.08	0.04	0.472	-0.05	0.07	0.641	-0.06	0.12	0.939	-0.01	0.13	0.92	0.81	0.95	Not robust	18.1	4	1	0.26
met-a-742	Succinylcarnitine	6	5e-08	0.6	0.044	-0.51	0.25	0.137	-0.41	0.27	0.899	0.07	0.55	0.374	-0.29	0.3	0.29	0.3	0.99	Not robust	113.3	1	1	0.26
met-a-501	Pyroglutamine*	11	5e-06	1.18	0.0464	0.17	0.08	0.136	0.26	0.17	0.603	-0.19	0.35	0.281	0.27	0.24	0.94	0.3	0.98	Not robust	41.41		1	0.27
met-a-525	X-11497	53	5e-05	0.81	0.0462	-0.21	0.1	0.155	-0.25	0.18	0.998	0	0.43	0.336	-0.38	0.39	0.98	0.62	0.94	Not robust	18.55	3	1	0.27
met-c-853	Free cholesterol to esterified cholesterol ratio	12	5e-08	1.07	0.0464	0.07	0.04	0.327	0.05	0.05	0.134	0.11	0.06	0.932	-0.01	0.06	0.16	0.54	0.99	Not robust	73.33		1	0.27
met-a-444	X-10510	15	5e-06	0.76	0.047	-0.27	0.14	0.458	-0.2	0.27	0.952	0.03	0.47	0.429	-0.23	0.28	0.95	0.49	0.97	Not robust	33.14	1	1	0.27
met-a-303	Glutamine	7	5e-06	0.33	0.0491	-1.1	0.56	0.02	-1.49	0.64	0.168	-1.72	1.07	0.0737	-1.62	0.75	0.29	0.52	0.97	Not robust	31.36		1	0.27
met-a-634	1-arachidonoylglycerophosphoinositol*	12	5e-06	1.45	0.0488	0.37	0.19	0.108	0.51	0.31	0.408	-0.67	0.77	0.162	0.65	0.43	0.75	0.19	0.96	Not robust	34.21	2	1	0.27
met-c-886	Total cholesterol in large VLDL	10	5e-08	1.07	0.0485	0.07	0.04	0.107	0.09	0.05	0.286	0.13	0.12	0.178	0.1	0.07	0.63	0.59	0.98	Not robust	74.47		1	0.27
met-c-891	Phospholipids in large VLDL	9	5e-08	1.09	0.049	0.09	0.04	0.0877	0.1	0.06	0.483	0.09	0.12	0.149	0.1	0.06	0.41	0.96	0.98	Not robust	74.14		1	0.27
met-a-484	X-11204	24	5e-06	1.62	0.052	0.48	0.25	0.105	0.62	0.38	0.0593	2.14	1.08	0.279	0.86	0.77	0.76	0.13	0.96	Not robust	23.71		1	0.28
met-c-887	Cholesterol esters in large VLDL	11	5e-08	1.06	0.0516	0.06	0.03	0.2	0.06	0.05	0.321	0.1	0.09	0.245	0.08	0.07	0.7	0.69	0.98	Not robust	70.18		1	0.28
met-a-591	X-12216	38	5e-05	0.9	0.0548	-0.11	0.05	0.782	-0.03	0.1	0.8	0.03	0.12	0.825	-0.03	0.13	0.96	0.18	0.95	Not robust	18.2	6	1	0.29
met-a-310	Lactate	44	5e-05	1.37	0.0555	0.32	0.17	0.114	0.38	0.24	0.13	0.62	0.4	0.335	0.44	0.45	0.5	0.41	0.95	Not robust	18.62	3	1	0.29
met-c-899	Cholesterol esters in medium HDL	7	5e-08	0.9	0.0578	-0.11	0.06	0.075	-0.12	0.07	0.888	-0.02	0.17	0.141	-0.13	0.07	0.35	0.61	0.98	Not robust	58.29		1	0.3
met-a-631	Bilirubin (E,Z or Z,E)*	7	5e-06	1.26	0.0585	0.23	0.12	0.169	0.18	0.13	0.849	0.05	0.26	0.207	0.18	0.13	0.33	0.48	0.97	Not robust	55.67	1	1	0.3
met-a-558	1-arachidonoylglycerophosphocholine*	6	5e-07	0.81	0.0598	-0.21	0.11	0.22	-0.24	0.2	0.551	-0.21	0.32	0.38	-0.2	0.21	0.87	0.99	0.99	Not robust	96.19	1	1	0.31
met-a-653	Stearoylcarnitine	27	5e-05	0.81	0.0602	-0.22	0.11	0.44	-0.15	0.19	0.747	0.13	0.39	0.547	-0.18	0.3	0.84	0.35	0.95	Not robust	19.2	2	1	0.31
met-a-424	1-oleoylglycerol (1-monoolein)	10	5e-06	1.2	0.0628	0.18	0.1	0.355	0.16	0.18	0.318	0.6	0.56	0.839	0.06	0.29	0.88	0.47	0.95	Not robust	24.34		1	0.32
met-c-957	Total lipids in chylomicrons and largest VLDL particles	9	5e-08	1.1	0.0628	0.1	0.05	0.0266	0.15	0.07	0.807	0.05	0.18	0.0907	0.19	0.1	0.34	0.76	0.98	Not robust	47.94		1	0.32
met-c-916	Mono-unsaturated fatty acids	7	5e-08	1.1	0.065	0.1	0.05	0.0346	0.13	0.06	0.668	-0.1	0.22	0.186	0.14	0.1	0.26	0.4	0.98	Not robust	55.03		1	0.32
met-a-713	X-13859	7	5e-07	0.49	0.0658	-0.72	0.39	0.337	-0.52	0.54	0.331	-1.59	1.48	0.88	-0.13	0.83	0.47	0.57	0.97	Not robust	27.67		1	0.33
met-a-327	Methionine	11	5e-06	0.45	0.0683	-0.79	0.43	0.391	-0.64	0.75	0.61	-0.85	1.61	0.6	-0.51	0.94	0.78	0.97	0.96	Not robust	22.62	2	1	0.33
met-a-396	X-18601	10	5e-06	0.84	0.0682	-0.17	0.09	0.13	-0.27	0.18	0.495	-0.36	0.5	0.236	-0.35	0.28	0.89	0.71	0.97	Not robust	28.88	1	1	0.33
met-a-549	X-11843	31	5e-05	1.03	0.0689	0.03	0.02	0.464	0.03	0.04	0.122	0.05	0.03	0.203	0.03	0.03	0.88	0.5	0.95	Not robust	18.12	1	1	0.33
met-a-563	Gamma-glutamylmethionine*	52	5e-05	1.16	0.068	0.15	0.08	0.0066	0.34	0.13	0.0546	0.4	0.2	0.096	0.42	0.25	0.62	0.18	0.95	Not robust	18.31	4	1	0.33
met-a-640	X-12696	10	5e-06	0.67	0.0689	-0.41	0.22	0.146	-0.56	0.39	0.178	-1.2	0.81	0.293	-0.65	0.59	0.81	0.33	0.96	Not robust	23.52	1	1	0.33
met-a-546	X-11805	42	5e-05	1.07	0.0701	0.07	0.04	0.306	0.07	0.07	0.59	0.05	0.1	0.585	0.05	0.09	0.95	0.89	0.95	Not robust	18.1	2	1	0.33
met-a-670	X-12855	11	5e-06	0.76	0.0706	-0.27	0.15	0.121	-0.35	0.22	0.407	-0.58	0.67	0.26	-0.37	0.31	0.58	0.65	0.95	Not robust	24.26	1	1	0.33
met-c-898	Total cholesterol in medium HDL	6	5e-08	0.9	0.0743	-0.1	0.06	0.102	-0.11	0.07	0.664	-0.07	0.15	0.158	-0.12	0.07	0.42	0.82	0.99	Not robust	69.65		1	0.34
met-a-346	Ursodeoxycholate	46	5e-05	0.93	0.0759	-0.08	0.04	0.238	-0.09	0.07	0.102	-0.17	0.1	0.77	-0.04	0.13	0.94	0.29	0.95	Not robust	18.16		1	0.35
met-a-650	X-12749	10	5e-07	1.67	0.0764	0.52	0.29	0.697	0.17	0.43	0.549	-0.57	0.91	0.827	0.1	0.47	0.6	0.24	0.95	Not robust	28.98		1	0.35
met-c-893	18:2, linoleic acid (LA)	13	5e-08	1.06	0.0785	0.05	0.03	0.404	0.04	0.04	0.409	0.08	0.09	0.724	0.02	0.07	0.54	0.8	0.98	Not robust	62.13	2	1	0.35
met-c-872	Triglycerides in IDL	19	5e-08	1.05	0.0807	0.05	0.03	0.524	0.03	0.04	0.489	-0.06	0.08	0.841	-0.01	0.06	0.6	0.18	0.99	Not robust	76.8		1	0.36
met-a-683	X-13429	28	5e-05	0.92	0.0816	-0.08	0.05	0.0532	-0.14	0.07	0.032	-0.23	0.1	0.0605	-0.17	0.09	0.65	0.1	0.96	Not robust	29.09	4	1	0.36
met-a-314	Mannose	8	5e-06	0.66	0.0842	-0.41	0.24	0.154	-0.34	0.24	0.257	-0.61	0.49	0.183	-0.38	0.26	0.26	0.65	0.99	Not robust	61.38		1	0.37
met-a-435	X-08988	26	5e-06	1.34	0.0851	0.29	0.17	0.557	0.18	0.31	0.705	-0.17	0.45	0.582	0.2	0.36	0.79	0.26	0.96	Not robust	27.89	2	1	0.37
met-c-888	Free cholesterol in large VLDL	11	5e-08	1.07	0.0854	0.06	0.04	0.18	0.07	0.05	0.549	0.07	0.11	0.2	0.1	0.07	0.58	0.97	0.98	Not robust	68.64		1	0.37
met-a-320	Deoxycholate	6	5e-06	1.14	0.0895	0.13	0.08	0.436	0.14	0.18	0.701	-0.39	0.95	0.285	0.28	0.23	0.93	0.61	0.96	Not robust	23.23		1	0.38
met-a-421	3-methyl-2-oxobutyrate	10	5e-06	1.95	0.0893	0.67	0.39	0.0894	0.87	0.51	0.83	-0.29	1.31	0.369	1.06	1.12	0.25	0.46	0.96	Not robust	21.79	1	1	0.38
met-a-475	Indolepropionate	9	5e-06	0.83	0.0902	-0.19	0.11	0.246	-0.28	0.25	0.389	-0.45	0.49	0.349	-0.29	0.29	0.94	0.59	0.97	Not robust	29.01		1	0.38
met-a-338	Pantothenate	14	5e-06	0.79	0.0909	-0.24	0.14	0.373	-0.24	0.27	0.336	-0.37	0.37	0.355	-0.35	0.37	0.94	0.68	0.94	Not robust	23.77	1	1	0.38
met-a-466	Glutamate	35	5e-05	0.84	0.0925	-0.18	0.11	0.236	-0.19	0.16	0.899	-0.04	0.31	0.451	-0.2	0.26	0.62	0.64	0.94	Not robust	18.33	3	1	0.39
met-a-592	X-12217	6	5e-06	0.69	0.0932	-0.36	0.22	0.0272	-0.56	0.25	0.0483	-0.82	0.29	0.121	-0.54	0.29	0.21	0.12	0.95	Not robust	22.17	1	1	0.39
met-a-340	Alpha-tocopherol	40	5e-05	0.82	0.0979	-0.2	0.12	0.0767	-0.31	0.18	0.0139	-0.66	0.26	0.354	-0.35	0.37	0.4	0.05	0.95	Not robust	18.67	4	1	0.39
met-a-372	X-03088	7	5e-06	0.63	0.0952	-0.47	0.28	0.0613	-0.55	0.29	0.116	-0.75	0.4	0.126	-0.54	0.3	0.15	0.35	0.95	Not robust	22.03		1	0.39
met-a-388	Aspartate	18	5e-05	1.21	0.0978	0.19	0.12	0.119	0.26	0.17	0.0555	0.41	0.2	0.0941	0.33	0.19	0.38	0.2	0.94	Not robust	18.54	3	1	0.39
met-a-543	X-11793--oxidized bilirubin*	9	5e-06	1.15	0.0975	0.14	0.08	0.187	0.16	0.12	0.369	0.17	0.18	0.194	0.17	0.12	0.76	0.83	0.99	Not robust	77.55		1	0.39
met-a-703	4-hydroxyhippurate	50	5e-05	1.06	0.0977	0.06	0.04	0.227	0.07	0.06	0.886	0.01	0.09	0.366	0.12	0.13	0.9	0.58	0.94	Not robust	18.13		1	0.39
met-a-747	4-androsten-3beta,17beta-diol disulfate 1*	12	5e-06	0.91	0.0981	-0.1	0.06	0.954	0	0.08	0.506	0.08	0.11	0.915	0.01	0.08	0.6	0.08	0.98	Not robust	56.58	2	1	0.39
met-c-864	Total cholesterol in HDL	12	5e-08	0.93	0.0949	-0.07	0.04	0.084	-0.08	0.05	0.388	-0.09	0.1	0.112	-0.09	0.05	0.23	0.82	0.98	Not robust	75.63	1	1	0.39
met-a-315	Pyruvate	10	5e-06	0.76	0.103	-0.27	0.17	0.134	-0.37	0.25	0.935	0.04	0.48	0.266	-0.34	0.29	0.58	0.51	0.96	Not robust	22.26	1	1	0.39
met-a-486	Phenol sulfate	6	5e-06	0.86	0.102	-0.15	0.09	0.273	-0.24	0.22	0.438	-0.65	0.76	0.307	-0.28	0.24	0.91	0.53	0.92	Not robust	21.79	3	1	0.39
met-a-488	X-07765	9	5e-06	0.9	0.103	-0.11	0.07	0.139	-0.15	0.1	0.866	-0.03	0.16	0.373	-0.14	0.14	0.64	0.59	0.96	Not robust	22.34		1	0.39
met-a-513	X-11440	12	5e-06	1.1	0.101	0.09	0.06	0.447	0.07	0.09	0.948	-0.01	0.11	0.488	0.07	0.09	0.84	0.27	0.98	Not robust	77.08		1	0.39
met-a-520	X-11470	7	5e-06	1.34	0.101	0.3	0.18	0.0315	0.57	0.27	0.109	0.91	0.47	0.0992	0.59	0.3	0.57	0.2	0.97	Not robust	28.49		1	0.39
met-a-704	X-13741	8	5e-06	0.79	0.1	-0.23	0.14	0.571	-0.09	0.16	0.703	-0.28	0.7	0.802	0.07	0.28	0.17	0.95	0.96	Not robust	25.04		1	0.39
met-c-840	Alanine	6	5e-08	1.09	0.101	0.09	0.05	0.0912	0.13	0.08	0.129	0.53	0.28	0.195	0.15	0.1	0.61	0.18	0.98	Not robust	56.92		1	0.39
met-c-953	Total lipids in very small VLDL	18	5e-08	1.05	0.104	0.05	0.03	0.071	0.07	0.04	0.898	0.01	0.09	0.118	0.12	0.07	0.42	0.69	0.99	Not robust	77.09		1	0.39
met-a-660	X-12786	6	5e-06	1.27	0.105	0.24	0.15	0.236	0.24	0.2	0.0608	0.67	0.26	0.29	0.28	0.23	0.42	0.11	0.91	Not robust	23.94		1	0.39
met-a-477	Myristoleate (14:1n5)	9	5e-06	1.27	0.105	0.24	0.15	0.667	0.09	0.22	0.943	-0.03	0.34	0.811	0.07	0.28	0.64	0.4	0.96	Not robust	27.14	1	1	0.39
met-c-954	Concentration of very small VLDL particles	18	5e-08	1.04	0.109	0.04	0.03	0.392	0.04	0.04	0.393	-0.08	0.09	0.75	-0.02	0.07	0.69	0.18	0.99	Not robust	77.07		1	0.4
met-c-958	Concentration of chylomicrons and largest VLDL particles	6	5e-08	1.1	0.109	0.1	0.06	0.0497	0.14	0.07	0.7	0.09	0.23	0.152	0.16	0.1	0.3	0.99	0.97	Not robust	54.05	1	1	0.4
met-a-504	X-11381	8	5e-06	0.61	0.11	-0.49	0.3	0.236	-0.48	0.4	0.708	-0.38	0.96	0.249	-0.74	0.58	0.4	0.91	0.97	Not robust	30.23	1	1	0.4
met-c-854	Description of average fatty acid chain length, not actual carbon number	18	5e-06	0.95	0.111	-0.05	0.03	0.973	0	0.05	0.423	0.06	0.07	0.939	0	0.06	0.74	0.07	0.96	Not robust	24.25		1	0.4
met-a-362	Betaine	6	5e-07	0.69	0.112	-0.37	0.23	0.361	-0.35	0.38	0.423	-0.78	0.88	0.504	-0.33	0.46	0.72	0.64	0.98	Not robust	46.54	1	1	0.4
met-a-381	N-acetylornithine	9	5e-06	0.88	0.115	-0.13	0.08	0.0556	-0.15	0.08	0.308	-0.13	0.12	0.109	-0.15	0.09	0.32	0.98	0.99	Not robust	163.76		1	0.41
met-a-584	X-12100--hydroxytryptophan*	9	5e-07	1.5	0.115	0.41	0.26	0.402	0.41	0.49	0.188	2.84	1.95	0.903	-0.11	0.85	0.87	0.24	0.97	Not robust	30.01	1	1	0.41
met-a-627	Epiandrosterone sulfate	6	5e-06	0.89	0.118	-0.11	0.07	0.19	-0.13	0.1	0.395	-0.14	0.14	0.27	-0.13	0.1	0.62	0.86	0.98	Not robust	77.3	2	1	0.41
met-a-474	Gamma-glutamylvaline	8	5e-06	0.53	0.12	-0.64	0.41	0.207	-0.57	0.45	0.23	-2.54	1.9	0.29	-0.65	0.57	0.13	0.35	0.96	Not robust	23.88		1	0.42
met-a-623	5-dodecenoate (12:1n7)	11	5e-06	0.86	0.121	-0.15	0.09	0.277	-0.2	0.19	0.329	-0.42	0.41	0.365	-0.22	0.23	0.93	0.49	0.96	Not robust	25.24		1	0.42
met-c-902	Concentration of medium HDL particles	6	5e-07	0.9	0.123	-0.11	0.07	0.0731	-0.14	0.08	0.86	-0.05	0.27	0.23	-0.14	0.1	0.33	0.85	0.97	Not robust	49.06		1	0.42
met-a-358	Serotonin (5HT)	10	5e-06	1.36	0.124	0.3	0.2	0.123	0.45	0.29	0.813	0.23	0.94	0.209	0.6	0.44	0.59	0.94	0.94	Not robust	23	1	1	0.42
met-a-662	X-12816	33	5e-05	1.07	0.126	0.07	0.05	0.103	0.11	0.07	0.214	0.12	0.09	0.158	0.14	0.1	0.33	0.56	0.95	Not robust	18.34	2	1	0.43
met-a-737	7-alpha-hydroxy-3-oxo-4-cholestenoate (7-Hoca)	7	5e-06	0.56	0.129	-0.59	0.39	0.717	-0.2	0.55	0.231	-1.68	1.23	0.913	0.09	0.8	0.46	0.39	0.96	Not robust	22.75	1	1	0.44
met-a-379	Carnitine	15	5e-08	0.63	0.131	-0.46	0.31	0.147	-0.72	0.49	0.184	-0.96	0.68	0.154	-0.75	0.5	0.81	0.4	0.98	Not robust	60.33	2	1	0.44
met-c-950	Concentration of very large VLDL particles	8	5e-08	1.08	0.131	0.08	0.05	0.0491	0.12	0.06	0.558	0.11	0.17	0.117	0.15	0.08	0.29	0.86	0.98	Not robust	60.24		1	0.44
met-a-409	Docosahexaenoate (DHA; 22:6n3)	35	5e-05	0.85	0.132	-0.16	0.1	0.201	-0.23	0.18	0.553	-0.18	0.31	0.194	-0.41	0.31	0.76	0.93	0.95	Not robust	18.27		1	0.44
met-a-326	Lysine	14	5e-06	0.51	0.138	-0.68	0.46	0.381	-0.57	0.66	0.374	-2.07	2.24	0.572	-0.48	0.83	0.32	0.54	0.96	Not robust	26.53	1	1	0.45
met-a-442	X-10500	22	5e-06	1.42	0.138	0.35	0.24	0.279	0.47	0.43	0.522	0.65	0.99	0.518	0.41	0.63	0.89	0.76	0.96	Not robust	22.85	2	1	0.45
met-a-523	X-11485	36	5e-05	0.91	0.136	-0.09	0.06	0.661	-0.04	0.1	0.691	0.06	0.16	0.946	0.01	0.17	0.66	0.29	0.95	Not robust	18.16	4	1	0.45
met-a-702	2-tetradecenoyl carnitine	11	5e-06	0.86	0.135	-0.15	0.1	0.139	-0.26	0.17	0.731	0.11	0.31	0.442	-0.17	0.21	0.76	0.37	0.96	Not robust	24.68		1	0.45
met-c-960	Triglycerides in chylomicrons and largest VLDL particles	9	5e-08	1.08	0.137	0.08	0.05	0.0894	0.11	0.06	0.858	-0.03	0.17	0.172	0.15	0.1	0.31	0.53	0.98	Not robust	57.22		1	0.45
met-a-333	Pentadecanoate (15:0)	9	5e-06	1.41	0.143	0.34	0.23	0.171	0.54	0.39	0.185	1.05	0.72	0.253	0.71	0.57	0.76	0.31	0.96	Not robust	23.43	1	1	0.45
met-a-417	Myo-inositol	6	5e-07	0.53	0.143	-0.63	0.43	0.116	-0.87	0.56	0.0822	-2.56	1.11	0.097	-1.38	0.68	0.41	0.13	0.98	Not robust	35.21	1	1	0.45
met-a-571	Gamma-tocopherol	7	5e-06	0.81	0.141	-0.21	0.14	0.245	-0.27	0.23	0.39	-0.82	0.88	0.195	-0.48	0.33	0.73	0.5	0.92	Not robust	22.7		1	0.45
met-c-901	Total lipids in medium HDL	6	5e-07	0.91	0.14	-0.1	0.07	0.161	-0.11	0.08	0.709	-0.08	0.21	0.239	-0.12	0.09	0.34	0.95	0.98	Not robust	53.86		1	0.45
met-c-915	Triglycerides in medium VLDL	12	5e-08	1.05	0.142	0.05	0.04	0.0874	0.09	0.05	0.298	0.1	0.09	0.254	0.07	0.06	0.54	0.57	0.98	Not robust	70.42		1	0.45
met-a-481	Caprylate (8:0)	6	5e-07	0.47	0.146	-0.75	0.51	0.788	-0.19	0.7	0.258	-7.13	5.41	0.97	-0.03	0.83	0.45	0.3	0.97	Not robust	27.3		1	0.45
met-a-618	Decanoylcarnitine	7	5e-06	1.27	0.146	0.24	0.16	0.113	0.27	0.17	0.49	0.27	0.36	0.0751	0.35	0.16	0.11	0.93	0.99	Not robust	67.7	2	1	0.45
met-a-668	Laurylcarnitine	50	5e-05	0.9	0.146	-0.1	0.07	0.152	-0.15	0.1	0.108	-0.32	0.2	0.288	-0.23	0.22	0.49	0.23	0.94	Not robust	18.23	3	1	0.45
met-a-709	Tetradecanedioate	13	5e-06	0.9	0.146	-0.11	0.08	0.147	-0.16	0.11	0.435	-0.11	0.13	0.265	-0.13	0.11	0.65	0.99	0.98	Not robust	43.81	1	1	0.45
met-c-949	Total lipids in very large VLDL	8	5e-08	1.07	0.15	0.07	0.05	0.0708	0.12	0.07	0.474	0.13	0.17	0.131	0.15	0.09	0.4	0.73	0.98	Not robust	59.77		1	0.46
met-a-559	1-palmitoleoylglycerophosphocholine*	8	5e-06	1.37	0.152	0.32	0.22	0.842	0.07	0.36	0.833	-0.21	0.95	0.9	0.07	0.54	0.67	0.58	0.95	Not robust	24.12		1	0.46
met-a-441	X-10429	15	5e-06	1.21	0.152	0.19	0.13	0.544	0.13	0.22	0.994	0	0.26	0.689	0.09	0.22	0.79	0.37	0.96	Not robust	24.59		1	0.46
met-a-385	3-phenylpropionate (hydrocinnamate)	51	5e-05	0.95	0.155	-0.05	0.04	0.303	-0.06	0.06	0.555	-0.03	0.05	0.455	-0.04	0.05	0.66	0.54	0.95	Not robust	19.07	2	1	0.46
met-a-449	N-acetylglycine	7	5e-06	1.14	0.154	0.13	0.09	0.579	0.06	0.11	0.994	0	0.2	0.688	0.05	0.12	0.5	0.48	0.98	Not robust	58.45		1	0.46
met-a-534	X-11550	12	5e-06	0.5	0.157	-0.7	0.49	0.0241	-1.58	0.7	0.0886	-3.22	1.71	0.142	-1.75	1.1	0.5	0.15	0.96	Not robust	24.6	3	1	0.46
met-a-691	X-13496	27	5e-06	1.38	0.157	0.32	0.23	0.952	-0.02	0.38	0.71	-0.39	1.04	0.621	-0.36	0.71	0.89	0.49	0.96	Not robust	23.63	2	1	0.46
met-a-739	Dimethylarginine (SDMA + ADMA)	18	5e-06	1.38	0.156	0.32	0.23	0.803	0.11	0.43	0.891	0.11	0.81	0.487	-0.48	0.67	0.92	0.78	0.95	Not robust	22.69	3	1	0.46
met-a-393	X-04499--3,4-dihydroxybutyrate	11	5e-06	0.76	0.16	-0.27	0.19	0.555	-0.21	0.35	0.517	0.74	1.1	0.781	-0.16	0.56	0.87	0.37	0.96	Not robust	25.69		1	0.47
met-a-493	Heme*	36	5e-05	1.11	0.163	0.1	0.07	0.796	-0.03	0.12	0.466	0.16	0.22	0.609	-0.11	0.21	0.89	0.77	0.93	Not robust	18.85	2	1	0.47
met-a-533	X-11546	8	5e-06	1.08	0.163	0.08	0.05	0.191	0.11	0.08	0.644	0.06	0.11	0.267	0.11	0.09	0.54	0.84	0.95	Not robust	22.74		1	0.47
met-a-557	X-11876	8	5e-06	0.81	0.162	-0.21	0.15	0.279	-0.22	0.2	0.511	-0.26	0.36	0.283	-0.25	0.21	0.42	0.9	0.95	Not robust	22.26		1	0.47
met-a-654	1-stearoylglycerophosphoethanolamine	9	5e-06	0.8	0.163	-0.22	0.16	0.142	-0.34	0.23	0.216	-0.67	0.5	0.201	-0.35	0.25	0.57	0.36	0.97	Not robust	25.78		1	0.47
met-a-672	Isovalerate	36	5e-05	1.16	0.16	0.15	0.11	0.237	0.23	0.19	0.651	0.18	0.39	0.468	0.24	0.32	0.94	0.94	0.95	Not robust	18.13		1	0.47
met-a-744	Cyclo(leu-pro)	10	5e-06	1.19	0.163	0.17	0.12	0.0719	0.29	0.16	0.413	0.3	0.35	0.159	0.28	0.18	0.35	0.7	0.95	Not robust	22.43		1	0.47
met-a-389	X-04357	43	5e-05	1.1	0.166	0.1	0.07	0.252	0.12	0.11	0.561	0.1	0.16	0.565	0.11	0.19	0.76	1	0.95	Not robust	18.23	3	1	0.47
met-c-852	22:6, docosahexaenoic acid	9	5e-07	1.07	0.169	0.06	0.05	0.308	0.06	0.06	0.743	-0.06	0.18	0.66	-0.05	0.1	0.42	0.5	0.95	Not robust	41.52		1	0.48
met-c-952	Triglycerides in very large VLDL	9	5e-08	1.06	0.17	0.06	0.04	0.197	0.08	0.06	0.302	0.15	0.13	0.133	0.13	0.08	0.51	0.5	0.98	Not robust	62.21		1	0.48
met-a-322	Inosine	42	5e-05	1.04	0.171	0.04	0.03	0.881	0.01	0.05	0.934	0.01	0.08	0.799	-0.02	0.08	0.87	0.67	0.95	Not robust	19.04	3	1	0.48
met-a-403	Estrone 3-sulfate	7	5e-06	0.95	0.175	-0.05	0.04	0.17	-0.08	0.06	0.262	-0.09	0.07	0.318	-0.07	0.07	0.63	0.55	0.96	Not robust	24.27		1	0.48
met-a-419	1,5-anhydroglucitol (1,5-AG)	12	5e-06	0.75	0.174	-0.28	0.21	0.177	-0.4	0.3	0.881	-0.09	0.56	0.381	-0.32	0.35	0.49	0.71	0.96	Not robust	27.09	3	1	0.48
met-c-889	Total lipids in large VLDL	9	5e-08	1.07	0.175	0.07	0.05	0.0578	0.11	0.06	0.262	0.18	0.15	0.104	0.12	0.07	0.27	0.44	0.97	Not robust	65.23		1	0.48
met-c-892	Triglycerides in large VLDL	9	5e-08	1.06	0.178	0.05	0.04	0.154	0.08	0.06	0.304	0.14	0.13	0.164	0.1	0.07	0.55	0.49	0.97	Not robust	71.67		1	0.49
met-a-487	X-06126	10	5e-06	0.91	0.183	-0.1	0.07	0.615	-0.09	0.18	0.492	0.46	0.64	0.678	-0.1	0.24	0.97	0.4	0.93	Not robust	22.06		1	0.49
met-a-593	X-12230	27	5e-05	0.93	0.183	-0.08	0.06	0.481	-0.07	0.09	0.192	0.19	0.14	0.527	-0.08	0.13	0.77	0.04	0.95	Not robust	18.64	2	1	0.49
met-a-656	Bradykinin, des-arg(9)	13	5e-06	0.96	0.181	-0.04	0.03	0.322	-0.06	0.06	0.47	-0.08	0.1	0.621	0.04	0.07	0.93	0.72	0.98	Not robust	45.54	1	1	0.49
met-a-687	2-palmitoylglycerophosphocholine*	14	5e-06	0.74	0.182	-0.3	0.23	0.791	-0.09	0.34	0.639	-0.39	0.81	0.973	0.02	0.59	0.64	0.91	0.95	Not robust	21.76	1	1	0.49
met-a-609	X-12441--12-hydroxyeicosatetraenoate (12-HETE)	6	5e-06	0.93	0.189	-0.07	0.05	0.579	-0.05	0.09	0.47	0.15	0.19	0.851	-0.02	0.1	0.67	0.28	0.83	Not robust	36.37		1	0.51
met-c-896	Mean diameter for LDL particles	7	5e-08	1.07	0.192	0.06	0.05	0.288	0.06	0.05	0.36	0.14	0.14	0.39	0.05	0.06	0.28	0.58	0.99	Not robust	88.6		1	0.51
met-a-568	X-12040	7	5e-06	0.96	0.201	-0.04	0.03	0.445	-0.04	0.05	0.557	0.05	0.09	0.377	-0.07	0.07	0.48	0.29	0.94	Not robust	24.74	1	1	0.53
met-a-561	X-12007	17	5e-06	1.05	0.202	0.05	0.04	0.142	0.1	0.07	0.146	0.12	0.08	0.116	0.1	0.06	0.79	0.27	0.96	Not robust	23.04	1	1	0.53
met-a-576	Palmitoleate (16:1n7)	65	5e-05	1.1	0.204	0.1	0.08	0.427	0.1	0.12	0.991	0	0.21	0.909	0.02	0.2	0.69	0.62	0.95	Not robust	18.57	1	1	0.54
met-a-615	Octanoylcarnitine	6	5e-06	1.24	0.206	0.21	0.17	0.0992	0.25	0.15	0.228	0.44	0.31	0.115	0.3	0.16	0.14	0.43	0.99	Not robust	95.96	1	1	0.54
met-a-720	X-14205--alpha-glutamyltyrosine	7	5e-06	1.18	0.206	0.16	0.13	0.646	0.08	0.18	0.813	-0.09	0.37	0.949	0.02	0.3	0.45	0.49	0.97	Not robust	29.14		1	0.54
met-a-604	X-12405	31	5e-05	1.09	0.209	0.08	0.07	0.502	0.09	0.14	0.932	0.02	0.18	0.457	-0.16	0.21	0.99	0.67	0.95	Not robust	18.64	1	1	0.54
met-c-841	Albumin	16	5e-06	1.08	0.208	0.08	0.06	0.262	0.09	0.08	0.929	-0.01	0.14	0.611	-0.07	0.13	0.27	0.48	0.96	Not robust	26.5		1	0.54
met-c-951	Phospholipids in very large VLDL	9	5e-08	1.06	0.209	0.06	0.04	0.274	0.07	0.06	0.368	0.14	0.15	0.166	0.13	0.09	0.49	0.56	0.98	Not robust	62.25		1	0.54
met-a-400	Glycylvaline	36	5e-05	0.95	0.211	-0.05	0.04	0.716	-0.03	0.07	0.637	-0.07	0.16	0.904	-0.02	0.14	1	0.86	0.94	Not robust	18.16	2	1	0.54
met-a-476	Butyrylcarnitine	7	5e-07	0.91	0.217	-0.1	0.08	0.507	-0.05	0.08	0.805	-0.04	0.14	0.439	-0.07	0.08	0.33	0.6	1	Not robust	213.56		1	0.55
met-a-601	ADpSGEGDFXAEGGGVR*	37	5e-05	1.07	0.221	0.07	0.05	0.671	0.04	0.1	0.69	-0.05	0.13	0.918	0.01	0.14	0.77	0.31	0.95	Not robust	20.38		1	0.56
met-a-351	Valine	23	5e-05	0.75	0.222	-0.29	0.24	0.574	-0.22	0.4	0.988	-0.01	0.47	0.509	-0.26	0.39	0.82	0.45	0.95	Not robust	19.23	2	1	0.56
met-a-646	X-12728	6	5e-08	0.99	0.223	-0.01	0.01	0.681	-0.01	0.02	0.453	0.04	0.05	0.882	0	0.02	0.78	0.34	0.86	Not robust	32.49		1	0.56
met-a-746	5alpha-androstan-3beta,17beta-diol disulfate	10	5e-06	1.11	0.226	0.11	0.09	0.83	0.02	0.1	0.671	-0.07	0.17	0.844	0.02	0.11	0.22	0.25	0.97	Not robust	42.56		1	0.57
met-a-700	X-13658	8	5e-06	1.02	0.228	0.02	0.01	0.482	0.02	0.02	0.283	0.04	0.03	0.467	0.02	0.02	0.77	0.47	0.95	Not robust	25.4	1	1	0.57
met-a-480	Caproate (6:0)	16	5e-06	1.41	0.233	0.35	0.29	0.123	0.66	0.43	0.13	1.5	0.93	0.201	0.69	0.51	0.47	0.21	0.96	Not robust	23.24		1	0.58
met-a-307	Cholesterol	8	5e-07	1.55	0.235	0.44	0.37	0.0766	0.99	0.56	0.208	1.77	1.25	0.18	1.14	0.77	0.66	0.3	0.96	Not robust	29.63		1	0.58
met-a-364	Phosphate	15	5e-05	1.34	0.236	0.29	0.25	0.233	0.5	0.42	0.739	0.16	0.47	0.267	0.6	0.52	0.79	0.71	0.95	Not robust	19.13	3	1	0.58
met-c-846	3-hydroxybutyrate	10	5e-06	0.92	0.24	-0.08	0.07	0.406	-0.08	0.1	0.615	-0.1	0.19	0.356	-0.15	0.15	0.63	0.91	0.97	Not robust	26.8	1	1	0.59
met-a-316	Uridine	14	5e-06	0.64	0.242	-0.45	0.38	0.515	-0.35	0.55	0.682	-0.9	2.15	0.644	-0.35	0.74	0.55	0.83	0.96	Not robust	27.79		1	0.59
met-a-469	Alanine	22	5e-06	0.76	0.241	-0.27	0.23	0.649	-0.17	0.37	0.301	1.05	0.99	0.869	0.13	0.75	0.8	0.18	0.96	Not robust	25.09		1	0.59
met-a-367	Undecanoate (11:0)	8	5e-07	0.51	0.243	-0.67	0.58	0.75	-0.24	0.75	0.714	1.6	4.17	0.833	0.25	1.16	0.37	0.6	0.97	Not robust	27.25		1	0.59
met-a-685	X-13435	10	5e-06	1.21	0.252	0.19	0.17	0.379	0.19	0.22	0.441	0.25	0.31	0.289	0.31	0.28	0.48	0.82	0.96	Not robust	38.65	1	1	0.61
met-a-317	Linoleate (18:2n6)	9	5e-06	1.38	0.254	0.32	0.28	0.121	0.66	0.43	0.118	2.31	1.3	0.248	0.87	0.7	0.61	0.16	0.96	Not robust	23.93		1	0.61
met-a-387	Glycerophosphorylcholine (GPC)	8	5e-06	1.11	0.255	0.1	0.09	0.626	0.06	0.12	0.971	0.01	0.14	0.65	0.05	0.11	0.7	0.32	0.96	Not robust	22.6		1	0.61
met-a-321	Margarate (17:0)	6	5e-06	0.82	0.261	-0.2	0.17	0.597	-0.17	0.33	0.486	-0.77	1	0.813	-0.11	0.43	0.84	0.59	0.97	Not robust	29		1	0.61
met-a-430	Phenyllactate (PLA)	9	5e-06	1.34	0.261	0.29	0.26	0.802	0.1	0.39	0.338	0.83	0.81	0.939	-0.04	0.5	0.56	0.5	0.97	Not robust	30.14	3	1	0.61
met-a-580	X-12092	10	5e-06	1.06	0.26	0.05	0.05	0.156	0.06	0.04	0.0332	0.15	0.06	0.0896	0.09	0.05	0.24	0.04	1	Not robust	314.34	3	1	0.61
met-a-617	N-acetylthreonine	6	5e-06	1.59	0.26	0.46	0.41	0.139	0.75	0.5	0.0761	2.12	0.89	0.119	1	0.53	0.27	0.11	0.96	Not robust	22.84		1	0.61
met-c-842	Apolipoprotein A-I	8	5e-08	0.95	0.258	-0.05	0.04	0.213	-0.07	0.05	0.112	-0.2	0.1	0.157	-0.09	0.06	0.51	0.17	0.98	Not robust	69.52	2	1	0.61
met-a-530	X-11537	44	5e-05	1.05	0.265	0.05	0.05	0.548	0.05	0.09	0.336	0.15	0.15	0.464	0.08	0.11	0.82	0.51	0.95	Not robust	18.37		1	0.62
met-a-560	X-11905	10	5e-06	0.9	0.267	-0.11	0.1	0.23	-0.15	0.13	0.0633	-0.41	0.19	0.247	-0.15	0.12	0.33	0.11	0.98	Not robust	41.21	2	1	0.62
met-a-665	X-12844	6	5e-06	0.8	0.273	-0.22	0.2	0.439	-0.25	0.32	0.531	0.89	1.3	0.679	-0.17	0.39	0.63	0.43	0.98	Not robust	35.3	1	1	0.63
met-a-643	X-12717	42	5e-05	1.03	0.279	0.03	0.03	0.483	0.03	0.05	0.76	0.03	0.09	0.676	0.03	0.08	0.79	0.96	0.95	Not robust	18.44	3	1	0.64
met-a-509	X-11423--O-sulfo-L-tyrosine	8	5e-07	0.74	0.284	-0.3	0.28	0.95	0.03	0.5	0.592	-0.58	1.03	0.935	0.06	0.66	0.82	0.77	0.97	Not robust	34.4		1	0.65
met-a-582	X-12094	32	5e-05	1.11	0.286	0.1	0.09	0.879	0.02	0.15	0.714	0.07	0.2	0.806	-0.07	0.28	0.71	0.88	0.95	Not robust	18.5	1	1	0.65
met-c-849	Citrate	5	5e-08	0.93	0.287	-0.07	0.07	0.115	-0.15	0.09	0.972	-0.02	0.6	0.325	-0.18	0.16	0.41	0.94	0.99	Not robust	69.48		1	0.65
met-a-404	Glycocholate	6	5e-06	0.91	0.288	-0.09	0.09	0.306	-0.11	0.1	0.616	-0.07	0.14	0.4	-0.09	0.1	0.32	0.84	0.96	Not robust	22.41		1	0.65
met-a-464	Serine	17	5e-06	1.23	0.293	0.21	0.2	0.666	0.14	0.31	0.842	0.11	0.57	0.819	0.11	0.46	0.81	0.86	0.97	Not robust	35.01	1	1	0.66
met-a-626	10-nonadecenoate (19:1n9)	31	5e-05	0.89	0.292	-0.12	0.11	0.418	-0.14	0.17	0.192	-0.49	0.37	0.416	0.27	0.33	0.7	0.29	0.95	Not robust	19.06	2	1	0.66
met-a-652	Isovalerylcarnitine	13	5e-06	0.85	0.293	-0.16	0.16	0.171	-0.28	0.2	0.209	-0.37	0.28	0.18	-0.32	0.23	0.2	0.39	0.98	Not robust	46.05	1	1	0.66
met-a-648	X-12734	40	5e-05	0.98	0.298	-0.03	0.02	0.141	-0.06	0.04	0.0593	-0.08	0.04	0.194	-0.05	0.04	0.81	0.09	0.94	Not robust	18.43	2	1	0.66
met-a-583	X-12095--N1-methyl-3-pyridone-4-carboxamide	13	5e-06	1.15	0.302	0.14	0.14	0.488	0.19	0.28	0.379	0.36	0.39	0.267	0.52	0.45	0.91	0.54	0.96	Not robust	22.54	1	1	0.67
met-a-664	X-12833	10	5e-06	0.97	0.301	-0.03	0.03	0.574	-0.02	0.04	0.419	-0.04	0.05	0.844	-0.01	0.05	0.54	0.71	0.95	Not robust	23.62		1	0.67
met-a-383	3-methyl-2-oxovalerate	8	5e-07	0.7	0.304	-0.36	0.35	0.17	-0.63	0.46	0.463	-1.1	1.4	0.14	-1.05	0.63	0.38	0.6	0.97	Not robust	33.51		1	0.67
met-a-532	X-11540	33	5e-05	1.05	0.304	0.05	0.05	0.6	0.05	0.09	0.754	0.03	0.11	0.655	0.04	0.09	0.76	0.85	0.95	Not robust	18.53	2	1	0.67
met-a-454	X-10810	12	5e-06	0.91	0.309	-0.1	0.1	0.652	-0.08	0.17	0.585	0.11	0.19	0.87	-0.03	0.16	0.91	0.16	0.96	Not robust	23.8		1	0.68
met-a-473	Dodecanedioate	6	5e-06	1.11	0.313	0.1	0.1	0.539	0.13	0.21	0.905	-0.08	0.61	0.354	0.25	0.25	0.85	0.77	0.92	Not robust	24.28		1	0.68
met-a-633	X-12556	13	5e-06	1.27	0.316	0.24	0.23	0.547	0.2	0.33	0.513	0.54	0.81	0.658	0.23	0.51	0.39	0.7	0.97	Not robust	29.29		1	0.68
met-a-529	X-11530	43	5e-05	0.93	0.321	-0.07	0.07	0.19	0.13	0.1	0.204	0.15	0.12	0.209	0.13	0.1	0.32	0.03	0.97	Not robust	32.74	3	1	0.69
met-a-445	1-linoleoylglycerol (1-monolinolein)	43	5e-05	1.04	0.322	0.04	0.04	0.181	0.11	0.08	0.821	0.03	0.12	0.255	0.14	0.13	1	0.93	0.95	Not robust	19.25	3	1	0.69
met-c-959	Phospholipids in chylomicrons and largest VLDL particles	8	5e-08	1.05	0.325	0.05	0.05	0.122	0.11	0.07	0.668	-0.08	0.17	0.284	0.13	0.11	0.39	0.46	0.98	Not robust	54.91		1	0.7
met-a-510	X-09789	45	5e-05	0.95	0.331	-0.05	0.05	0.971	0	0.09	0.779	0.05	0.17	0.773	0.05	0.16	0.89	0.54	0.94	Not robust	18.41	3	1	0.7
met-a-728	X-14625	9	5e-06	1.37	0.329	0.32	0.32	0.817	0.12	0.51	0.621	-0.47	0.9	0.573	-0.41	0.7	0.7	0.37	0.96	Not robust	26.65	1	1	0.7
met-a-438	Cholate	34	5e-05	0.97	0.332	-0.03	0.03	0.994	0	0.05	0.517	-0.07	0.1	0.756	0.03	0.09	0.98	0.68	0.95	Not robust	18.25	1	1	0.7
met-a-680	Cysteine-glutathione disulfide	7	5e-06	0.86	0.334	-0.15	0.16	0.672	-0.08	0.18	0.734	0.35	0.99	0.909	0.03	0.24	0.16	0.62	0.97	Not robust	26.13		1	0.7
met-c-855	Omega-3 fatty acids	8	5e-07	1.05	0.334	0.05	0.05	0.105	0.1	0.06	0.356	0.17	0.17	0.0913	0.17	0.08	0.25	0.48	0.98	Not robust	52.19		1	0.7
met-a-336	Ornithine	6	5e-06	1.49	0.339	0.4	0.41	0.986	-0.01	0.51	0.966	-0.06	1.36	0.817	-0.14	0.58	0.21	0.74	0.96	Not robust	23.64		1	0.71
met-a-446	Indoleacetate	8	5e-06	0.82	0.337	-0.19	0.2	0.235	-0.35	0.3	0.333	-0.39	0.37	0.33	-0.38	0.36	0.58	0.53	0.96	Not robust	25.18	2	1	0.71
met-a-730	X-14632	12	5e-06	1.09	0.338	0.08	0.09	0.55	0.06	0.11	0.88	-0.02	0.13	0.864	-0.02	0.11	0.29	0.3	0.96	Not robust	22.3	1	1	0.71
met-a-312	Arabinose	28	5e-05	0.93	0.369	-0.08	0.09	0.238	-0.16	0.14	0.211	-0.18	0.14	0.178	-0.2	0.14	0.45	0.36	0.95	Not robust	17.94	2	1	0.71
met-a-331	Stearate (18:0)	24	5e-06	0.85	0.371	-0.17	0.19	0.996	0	0.33	0.218	-0.76	0.6	0.759	-0.15	0.49	0.91	0.29	0.96	Not robust	25.73	2	1	0.71
met-a-332	Oleate (18:1n9)	10	5e-06	1.32	0.381	0.28	0.32	0.613	0.23	0.45	0.702	0.79	1.98	0.743	0.23	0.69	0.48	0.8	0.96	Not robust	24.26	1	1	0.71
met-a-337	5-oxoproline	13	5e-06	1.25	0.38	0.22	0.26	0.77	-0.1	0.33	0.871	-0.07	0.42	0.693	-0.14	0.35	0.55	0.38	0.98	Not robust	58.42	3	1	0.71
met-a-356	Citrulline	6	5e-07	1.37	0.364	0.31	0.34	0.769	0.17	0.56	0.828	-1.58	6.81	0.964	0.04	0.89	0.77	0.79	0.95	Not robust	31.96		1	0.71
met-a-384	3-methylhistidine	31	5e-05	1.04	0.342	0.04	0.04	0.636	0.03	0.06	0.254	0.1	0.09	0.516	0.05	0.07	0.81	0.4	0.94	Not robust	18.27	3	1	0.71
met-a-391	X-04495	7	5e-06	0.92	0.386	-0.09	0.1	0.723	-0.1	0.27	0.614	-0.32	0.6	0.666	-0.14	0.31	0.97	0.69	0.96	Not robust	23.25		1	0.71
met-a-415	X-06350	7	5e-06	0.86	0.352	-0.15	0.16	0.577	-0.18	0.33	0.898	-0.07	0.5	0.635	-0.17	0.35	0.86	0.85	0.96	Not robust	23.05		1	0.71
met-a-429	4-methyl-2-oxopentanoate	7	5e-06	0.65	0.365	-0.43	0.47	0.552	0.33	0.56	0.496	1.17	1.6	0.57	0.62	1.02	0.17	0.34	0.95	Not robust	26.82		1	0.71
met-a-437	X-09108	6	5e-06	0.61	0.35	-0.5	0.54	0.0932	-1	0.59	0.113	-21.5	10.64	0.258	-1.48	1.16	0.17	0.12	0.96	Not robust	23.04		1	0.71
met-a-439	X-09706	11	5e-06	1.2	0.375	0.18	0.2	0.597	0.17	0.32	0.956	0.04	0.77	0.618	0.24	0.47	0.77	0.85	0.95	Not robust	22.89	1	1	0.71
met-a-462	3-(4-hydroxyphenyl)lactate	13	5e-06	1.17	0.368	0.16	0.17	0.799	0.07	0.29	0.366	0.43	0.46	0.868	-0.07	0.4	0.8	0.51	0.96	Not robust	24.97		1	0.71
met-a-468	Glycine	11	5e-06	1.13	0.37	0.12	0.14	0.557	0.1	0.16	0.731	0.07	0.2	0.573	0.09	0.16	0.51	0.74	0.99	Not robust	83.71		1	0.71
met-a-500	3-dehydrocarnitine*	15	5e-06	0.8	0.347	-0.23	0.24	0.166	-0.43	0.31	0.777	-0.27	0.95	0.232	-0.42	0.34	0.29	0.96	0.97	Not robust	30.62	1	1	0.71
met-a-542	X-11792	10	5e-06	0.94	0.378	-0.06	0.07	0.62	-0.04	0.08	0.938	-0.02	0.23	0.876	-0.02	0.13	0.38	0.86	0.97	Not robust	32.27		1	0.71
met-a-545	X-11799	41	5e-05	0.97	0.352	-0.03	0.04	0.865	-0.01	0.06	0.771	0.03	0.1	0.924	0.01	0.08	0.89	0.5	0.95	Not robust	21.81	2	1	0.71
met-a-547	X-11818	12	5e-06	1.2	0.36	0.18	0.2	0.532	0.17	0.27	0.933	0.04	0.41	0.802	0.09	0.35	0.43	0.69	0.96	Not robust	23.7	1	1	0.71
met-a-552	X-11849	68	5e-05	0.98	0.373	-0.02	0.02	0.753	0.01	0.04	0.988	0	0.07	0.445	0.05	0.06	0.97	0.75	0.95	Not robust	18.2	2	1	0.71
met-a-572	Gamma-glutamylphenylalanine	19	5e-06	1.35	0.345	0.3	0.32	0.956	-0.03	0.47	0.71	0.38	1	0.956	0.04	0.74	0.4	0.93	0.96	Not robust	24.21		1	0.71
met-a-575	Valerate	26	5e-05	0.9	0.383	-0.1	0.12	0.793	-0.05	0.19	0.878	-0.08	0.49	0.999	0	0.36	0.86	0.96	0.95	Not robust	18.5	2	1	0.71
met-a-577	Alpha-ketoglutarate	11	5e-06	1.11	0.361	0.1	0.11	0.711	0.08	0.22	0.949	0.02	0.32	0.752	0.08	0.26	0.91	0.78	0.96	Not robust	23.28		1	0.71
met-a-586	Eicosenoate (20:1n9 or 11)	6	5e-06	1.16	0.384	0.15	0.17	0.654	0.14	0.31	0.954	-0.04	0.69	0.7	0.18	0.44	0.82	0.78	0.96	Not robust	23.38		1	0.71
met-a-612	X-12450	14	5e-06	1.17	0.362	0.16	0.17	0.824	0.06	0.27	0.525	-0.34	0.52	0.988	0.01	0.42	0.74	0.32	0.95	Not robust	22.32	2	1	0.71
met-a-619	1-palmitoylglycerophosphocholine	6	5e-07	1.69	0.365	0.53	0.58	0.133	1.11	0.74	0.174	-6.55	3.96	0.26	1.22	0.96	0.46	0.15	0.97	Not robust	27.58		1	0.71
met-a-622	1-stearoylglycerophosphocholine	41	5e-05	0.92	0.365	-0.08	0.09	0.853	-0.03	0.15	0.566	-0.17	0.29	0.654	0.14	0.3	0.95	0.74	0.94	Not robust	18.7	3	1	0.71
met-a-628	Linolenate [alpha or gamma; (18:3n3 or 6)]	28	5e-05	0.91	0.368	-0.1	0.11	0.565	-0.09	0.16	0.229	-0.31	0.25	0.821	-0.06	0.24	0.73	0.35	0.95	Not robust	18.01	3	1	0.71
met-a-657	X-12771	9	5e-06	0.88	0.383	-0.12	0.14	0.359	-0.16	0.18	0.938	-0.03	0.41	0.682	-0.08	0.19	0.24	0.82	0.96	Not robust	22.84	1	1	0.71
met-a-663	X-12830	7	5e-06	0.88	0.36	-0.12	0.13	0.999	0	0.19	0.606	-0.62	1.12	0.905	0.04	0.28	0.57	0.68	0.96	Not robust	21.88		1	0.71
met-a-707	1-palmitoylglycerophosphoethanolamine	12	5e-06	0.87	0.386	-0.14	0.16	0.216	-0.31	0.25	0.155	-0.62	0.41	0.418	-0.3	0.36	0.7	0.21	0.97	Not robust	30.3	1	1	0.71
met-a-711	Hexadecanedioate	12	5e-06	0.9	0.362	-0.1	0.11	0.167	-0.2	0.15	0.636	-0.11	0.23	0.178	-0.22	0.15	0.43	0.97	0.95	Not robust	41.36	2	1	0.71
met-a-724	X-14450--phenylalanylleucine	28	5e-05	1.06	0.341	0.05	0.06	0.925	-0.01	0.09	0.427	-0.14	0.18	0.632	-0.09	0.19	0.8	0.24	0.95	Not robust	18.77	1	1	0.71
met-a-727	X-14588	6	5e-06	2.16	0.384	0.77	0.89	0.625	0.61	1.25	0.336	-2.2	2.01	0.864	-0.33	1.84	0.47	0.17	0.96	Not robust	23.69		1	0.71
met-a-738	N-Butyl Oleate	31	5e-05	1.1	0.346	0.1	0.11	0.741	0.06	0.19	0.623	0.19	0.39	0.762	-0.12	0.38	0.96	0.8	0.95	Not robust	18.68	3	1	0.71
met-a-751	Palmitoyl sphingomyelin	8	5e-07	1.39	0.353	0.33	0.36	0.419	0.46	0.57	0.338	1.31	1.26	0.311	0.89	0.82	0.65	0.44	0.97	Not robust	28.3	1	1	0.71
met-c-851	Average number of double bonds in a fatty acid chain	6	5e-07	0.97	0.384	-0.03	0.04	0.381	-0.03	0.04	0.955	0	0.08	0.44	-0.03	0.04	0.28	0.67	0.99	Not robust	122.57		1	0.71
met-c-861	Glycerol	11	5e-06	1.04	0.376	0.04	0.04	0.876	-0.01	0.06	0.991	0	0.08	0.885	-0.01	0.08	0.71	0.56	0.96	Not robust	24.26	2	1	0.71
met-c-939	Urea	8	5e-06	1.09	0.354	0.08	0.09	0.548	0.06	0.1	0.617	-0.08	0.15	0.819	-0.03	0.12	0.12	0.22	0.94	Not robust	22.27		1	0.71
met-c-947	Phospholipids in very large HDL	13	5e-08	0.98	0.368	-0.02	0.03	0.325	-0.04	0.04	0.687	0.03	0.06	0.428	-0.04	0.05	0.46	0.4	0.99	Not robust	124.24	2	1	0.71
met-a-357	Biliverdin	14	5e-06	1.07	0.393	0.07	0.08	0.161	0.13	0.09	0.137	0.19	0.12	0.208	0.12	0.09	0.31	0.2	0.99	Not robust	75.92	2	1	0.71
met-a-635	X-12627	8	5e-06	1.16	0.393	0.15	0.18	0.352	0.23	0.25	0.9	-0.08	0.65	0.373	0.39	0.41	0.42	0.72	0.97	Not robust	22.25		1	0.71
met-a-527	X-11521	48	5e-05	0.96	0.4	-0.04	0.05	0.487	0.07	0.1	0.659	0.07	0.15	0.358	0.13	0.14	0.99	0.42	0.94	Not robust	18.88	2	1	0.73
met-a-726	X-14541	10	5e-06	1.08	0.406	0.08	0.09	0.369	0.12	0.13	0.495	0.26	0.37	0.428	0.16	0.19	0.57	0.61	0.95	Not robust	22.55		1	0.73
met-a-354	Cortisone	19	5e-06	0.81	0.415	-0.21	0.25	0.119	-0.61	0.39	0.734	-0.33	0.94	0.168	-0.87	0.61	0.64	0.9	0.96	Not robust	24.25	4	1	0.73
met-a-365	3-methoxytyrosine	8	5e-06	1.25	0.411	0.23	0.28	0.206	0.46	0.37	0.272	1.25	1.03	0.209	0.69	0.5	0.32	0.34	0.96	Not robust	23.76		1	0.73
met-a-422	1,6-anhydroglucose	44	5e-05	0.98	0.417	-0.02	0.03	0.922	-0.01	0.06	0.799	0.01	0.05	0.779	-0.01	0.05	0.98	0.38	0.95	Not robust	18.83		1	0.73
met-a-427	2-hydroxyisobutyrate	12	5e-06	0.83	0.412	-0.19	0.23	0.938	-0.03	0.32	0.401	-0.61	0.69	0.728	0.15	0.42	0.5	0.53	0.96	Not robust	28.35		1	0.73
met-a-433	Levulinate (4-oxovalerate)	7	5e-07	0.76	0.41	-0.28	0.34	0.992	-0.01	0.54	0.863	-0.88	4.83	0.839	0.16	0.76	0.67	0.91	0.97	Not robust	31.05		1	0.73
met-a-465	Trans-4-hydroxyproline	22	5e-05	1.08	0.413	0.08	0.1	0.462	0.12	0.17	0.577	-0.14	0.24	0.711	0.1	0.27	0.8	0.33	0.95	Not robust	18.21		1	0.73
met-a-598	X-12261	6	5e-06	0.95	0.418	-0.05	0.06	0.414	-0.06	0.07	0.206	-0.17	0.11	0.378	-0.07	0.07	0.37	0.28	0.96	Not robust	23.19	1	1	0.73
met-a-641	X-12704	44	5e-05	1.03	0.417	0.03	0.04	0.756	0.02	0.06	0.555	-0.08	0.13	0.85	0.02	0.1	0.92	0.39	0.95	Not robust	18.52	3	1	0.73
met-a-714	Threitol	32	5e-05	0.93	0.416	-0.07	0.09	0.753	0.04	0.14	0.937	-0.02	0.2	0.812	0.05	0.19	0.6	0.75	0.94	Not robust	19.05	4	1	0.73
met-a-382	N1-methyladenosine	19	5e-05	1.34	0.423	0.29	0.37	0.632	0.3	0.63	0.895	0.16	1.2	0.561	0.47	0.8	0.81	0.91	0.95	Not robust	20.07		1	0.74
met-a-452	Erythrose	29	5e-05	0.94	0.432	-0.06	0.07	0.609	-0.07	0.13	0.956	-0.01	0.15	0.532	-0.09	0.15	0.77	0.68	0.95	Not robust	18.73	1	1	0.75
met-a-621	1-oleoylglycerophosphocholine	6	5e-06	0.85	0.435	-0.17	0.21	0.927	0.04	0.44	0.89	-0.11	0.75	0.788	0.17	0.6	0.84	0.94	0.95	Not robust	23.15		1	0.75
met-a-645	X-12726	12	5e-06	0.97	0.435	-0.03	0.04	0.419	-0.08	0.1	0.606	-0.05	0.1	0.532	-0.06	0.09	0.99	0.76	0.96	Not robust	23.76		1	0.75
met-a-723	X-14374	6	5e-06	1.2	0.44	0.18	0.24	0.616	0.15	0.31	0.281	0.87	0.7	0.459	0.38	0.47	0.3	0.36	0.87	Not robust	22.1		1	0.76
met-a-311	3-hydroxybutyrate (BHBA)	41	5e-05	1.03	0.456	0.03	0.04	0.368	0.06	0.06	0.999	0	0.07	0.92	0.01	0.07	0.57	0.58	0.95	Not robust	18.57	3	1	0.77
met-a-319	Arachidonate (20:4n6)	11	5e-06	0.86	0.45	-0.16	0.21	0.416	-0.18	0.22	0.313	-0.36	0.34	0.481	-0.18	0.24	0.34	0.46	0.98	Not robust	55.76		1	0.77
met-a-471	2-aminobutyrate	9	5e-07	1.19	0.459	0.18	0.24	0.658	0.19	0.43	0.549	0.54	0.85	0.834	0.12	0.56	0.84	0.66	0.97	Not robust	33.38		1	0.77
met-a-556	X-11859	6	5e-06	1.24	0.456	0.22	0.29	0.732	-0.12	0.35	0.452	-0.55	0.67	0.657	-0.22	0.46	0.23	0.27	0.96	Not robust	21.5		1	0.77
met-a-574	Pseudouridine	19	5e-06	1.29	0.457	0.25	0.34	0.268	0.57	0.51	0.726	0.55	1.53	0.394	0.87	1	0.69	0.85	0.96	Not robust	23.51		1	0.77
met-a-607	1-eicosadienoylglycerophosphocholine*	6	5e-06	1.14	0.458	0.13	0.18	0.277	0.3	0.28	0.509	0.61	0.85	0.332	0.35	0.32	0.65	0.59	0.96	Not robust	24.15		1	0.77
met-a-624	Stearidonate (18:4n3)	49	5e-05	0.95	0.455	-0.05	0.07	0.711	-0.04	0.11	0.642	-0.09	0.19	0.759	-0.06	0.2	0.85	0.84	0.95	Not robust	19.17		1	0.77
met-a-701	X-13671	8	5e-06	0.81	0.449	-0.21	0.28	0.619	0.22	0.44	0.825	2.51	10.84	0.681	0.3	0.7	0.71	0.81	0.95	Not robust	22.82	2	1	0.77
met-a-736	Leucylleucine	8	5e-06	0.87	0.45	-0.14	0.18	0.986	0	0.25	0.358	0.72	0.72	0.552	0.29	0.46	0.47	0.26	0.95	Not robust	22.79		1	0.77
met-c-839	Acetate	10	5e-06	0.96	0.457	-0.04	0.06	0.516	-0.06	0.09	0.736	-0.05	0.14	0.693	-0.05	0.12	0.65	0.97	0.96	Not robust	22.56	3	1	0.77
met-c-862	Glycoproteins	10	5e-08	1.02	0.451	0.02	0.02	0.526	0.02	0.02	0.325	0.04	0.03	0.551	0.02	0.03	0.54	0.46	1	Not robust	250.99	1	1	0.77
met-a-328	Malate	7	5e-06	0.77	0.471	-0.27	0.37	0.282	-0.49	0.46	0.801	-0.82	3.08	0.321	-0.8	0.74	0.35	0.86	0.97	Not robust	26.12	3	1	0.78
met-a-349	Heptanoate (7:0)	18	5e-06	0.83	0.467	-0.18	0.25	0.801	-0.1	0.39	0.188	1.18	0.86	0.733	0.19	0.55	0.58	0.11	0.96	Not robust	24.35		1	0.78
met-a-361	Hypoxanthine	13	5e-06	0.85	0.468	-0.17	0.23	0.669	-0.13	0.31	0.245	-0.77	0.62	0.64	-0.25	0.52	0.36	0.32	0.96	Not robust	26.37		1	0.78
met-a-511	X-11437	7	5e-06	1.08	0.468	0.08	0.11	0.326	0.11	0.11	0.158	0.26	0.16	0.297	0.13	0.11	0.11	0.2	0.96	Not robust	23.58		1	0.78
met-a-731	X-14658	7	5e-06	1.05	0.469	0.05	0.07	0.647	0.08	0.18	0.769	0.12	0.4	0.844	0.05	0.24	0.96	0.85	0.95	Not robust	22.15		1	0.78
met-c-845	Ratio of bisallylic groups to total fatty acids	14	5e-07	0.98	0.471	-0.02	0.03	0.473	-0.02	0.03	0.737	-0.02	0.05	0.481	-0.02	0.03	0.13	0.92	0.99	Not robust	89.98		1	0.78
met-a-394	X-04500	34	5e-05	1.02	0.475	0.02	0.03	0.574	0.03	0.05	0.9	0.01	0.08	0.651	0.03	0.08	0.91	0.88	0.95	Not robust	18.31	3	1	0.78
met-a-750	Ergothioneine	33	5e-05	0.97	0.476	-0.03	0.05	0.747	-0.03	0.08	0.625	0.07	0.14	0.946	-0.01	0.12	0.83	0.43	0.94	Not robust	17.56	1	1	0.78
met-c-919	Phenylalanine	6	5e-07	1.05	0.476	0.05	0.07	0.305	0.1	0.1	0.816	-0.09	0.37	0.356	0.13	0.13	0.52	0.71	0.98	Not robust	42.23		1	0.78
met-a-578	Erythronate*	6	5e-07	1.34	0.481	0.29	0.41	0.935	0.05	0.59	0.887	-0.41	2.67	0.85	-0.16	0.8	0.54	0.8	0.98	Not robust	33.97		1	0.78
met-a-570	X-12063	6	5e-08	0.95	0.484	-0.05	0.08	0.3	-0.09	0.08	0.299	-0.15	0.12	0.324	-0.09	0.08	0.31	0.39	0.99	Not robust	163.41		1	0.78
met-a-642	X-12712	16	5e-06	1.02	0.485	0.02	0.03	0.72	0.02	0.04	0.0643	0.13	0.06	0.482	0.03	0.05	0.55	0.07	0.95	Not robust	23.22	1	1	0.78
met-a-666	X-12847	41	5e-05	1.03	0.485	0.03	0.04	0.481	0.04	0.06	0.951	0	0.07	0.831	0.02	0.07	0.78	0.72	0.95	Not robust	18.43	2	1	0.78
met-a-334	Myristate (14:0)	12	5e-06	1.1	0.497	0.1	0.14	0.827	0.07	0.31	0.563	0.26	0.43	0.738	0.12	0.36	0.96	0.67	0.96	Not robust	22.89		1	0.78
met-a-440	X-10395	19	5e-06	1.08	0.492	0.08	0.11	0.855	0.03	0.17	0.85	0.03	0.17	0.846	0.03	0.15	0.82	0.69	0.96	Not robust	27		1	0.78
met-a-456	Pyroglutamylglycine	34	5e-05	0.97	0.495	-0.03	0.04	0.84	-0.01	0.07	0.916	0.01	0.08	0.912	-0.01	0.06	0.55	0.62	0.94	Not robust	18.05	2	1	0.78
met-a-531	X-11538	9	5e-06	0.94	0.495	-0.06	0.09	0.26	-0.14	0.12	0.154	-0.29	0.18	0.212	-0.17	0.13	0.72	0.16	0.99	Not robust	66.02	1	1	0.78
met-a-539	ADSGEGDFXAEGGGVR*	6	5e-06	0.95	0.496	-0.05	0.08	0.789	0.04	0.15	0.774	-0.07	0.24	0.824	0.04	0.16	0.78	0.93	0.97	Not robust	32.94	1	1	0.78
met-a-554	X-11852	6	5e-06	0.94	0.499	-0.06	0.09	0.462	-0.08	0.1	0.725	-0.07	0.18	0.597	-0.07	0.13	0.24	0.96	0.96	Not robust	22.28		1	0.78
met-a-599	X-12329	19	5e-06	0.99	0.495	-0.01	0.01	0.904	0	0.02	0.616	-0.01	0.02	0.802	-0.01	0.03	0.79	0.92	0.96	Not robust	21.9		1	0.78
met-a-629	X-12510--2-aminooctanoic acid	11	5e-06	0.94	0.493	-0.06	0.09	0.432	-0.08	0.11	0.421	-0.13	0.15	0.426	-0.09	0.11	0.43	0.6	0.99	Not robust	89.63		1	0.78
met-a-740	Taurolithocholate 3-sulfate	6	5e-06	1.07	0.499	0.07	0.1	0.331	0.15	0.15	0.287	0.22	0.18	0.266	0.19	0.15	0.53	0.34	0.83	Not robust	22.67		1	0.78
met-c-847	Average number of methylene groups per double bond	7	5e-07	1.02	0.488	0.02	0.03	0.411	0.03	0.03	0.28	0.07	0.06	0.431	0.03	0.04	0.46	0.36	0.99	Not robust	125.38	1	1	0.78
met-a-718	P-cresol sulfate	8	5e-06	1.06	0.501	0.06	0.09	0.47	0.09	0.12	0.386	0.15	0.16	0.507	0.1	0.14	0.64	0.49	0.96	Not robust	23.85		1	0.78
met-a-418	Glucose	24	5e-06	1.2	0.508	0.18	0.27	0.954	0.02	0.43	0.388	-0.74	0.84	0.74	-0.19	0.57	0.64	0.26	0.96	Not robust	23.51	1	1	0.79
met-a-448	3-indoxyl sulfate	33	5e-05	0.94	0.507	-0.06	0.09	0.0714	-0.25	0.14	0.186	-0.3	0.22	0.167	-0.29	0.21	0.57	0.24	0.94	Not robust	18.14	2	1	0.79
met-a-472	Scyllo-inositol	6	5e-06	0.84	0.509	-0.17	0.26	0.0641	-0.48	0.26	0.0873	-0.92	0.41	0.138	-0.52	0.3	0.13	0.1	0.96	Not robust	33.56		1	0.79
met-a-705	1-myristoylglycerophosphocholine	28	5e-05	1.06	0.505	0.06	0.09	0.525	-0.1	0.15	0.617	-0.12	0.24	0.442	-0.2	0.25	0.87	0.41	0.94	Not robust	18.39	1	1	0.79
met-a-722	X-14304--leucylalanine	9	5e-06	1.06	0.509	0.06	0.1	0.187	0.2	0.15	0.558	0.18	0.3	0.35	0.23	0.23	0.73	0.67	0.96	Not robust	23.17	2	1	0.79
met-a-304	Tryptophan	15	5e-08	1.45	0.52	0.37	0.58	0.523	0.51	0.8	0.341	7.47	7.55	0.496	1.01	1.45	0.4	0.36	0.97	Not robust	33.53	3	1	0.79
met-a-313	Fructose	22	5e-05	0.94	0.523	-0.06	0.1	0.743	-0.05	0.15	0.923	0.02	0.24	0.142	-0.4	0.26	0.61	0.7	0.95	Not robust	18.01	4	1	0.79
met-a-345	Urate	8	5e-06	0.82	0.524	-0.19	0.3	0.518	-0.23	0.35	0.959	0.03	0.58	0.571	-0.2	0.33	0.48	0.66	0.99	Not robust	72.7	1	1	0.79
met-a-366	Pelargonate (9:0)	20	5e-06	0.83	0.518	-0.19	0.29	0.532	-0.26	0.42	0.0699	-2.23	1.16	0.488	-0.54	0.77	0.3	0.09	0.96	Not robust	23.21	2	1	0.79
met-a-519	X-11469	8	5e-06	0.94	0.521	-0.06	0.1	0.407	-0.12	0.14	0.778	0.23	0.78	0.427	-0.16	0.19	0.47	0.72	0.97	Not robust	31.89		1	0.79
met-a-566	X-12038	8	5e-07	0.79	0.523	-0.24	0.37	0.15	-0.74	0.51	0.231	-2.26	1.69	0.318	-0.86	0.8	0.46	0.27	0.97	Not robust	28.49		1	0.79
met-a-651	Stachydrine	36	5e-05	1.02	0.52	0.02	0.03	0.38	-0.04	0.04	0.395	-0.05	0.06	0.249	-0.07	0.06	0.65	0.22	0.95	Not robust	18.16	2	1	0.79
met-a-675	X-13215	26	5e-06	1.12	0.519	0.12	0.18	0.513	0.21	0.32	0.519	0.32	0.49	0.505	0.24	0.36	0.75	0.65	0.96	Not robust	23.49		1	0.79
met-a-748	4-androsten-3beta,17beta-diol disulfate 2*	11	5e-06	0.92	0.521	-0.08	0.13	0.449	-0.14	0.19	0.386	-0.42	0.46	0.28	-0.3	0.26	0.62	0.46	0.97	Not robust	31.4	2	1	0.79
met-c-938	Tyrosine	21	5e-06	0.97	0.515	-0.03	0.04	0.404	-0.06	0.07	0.542	-0.07	0.11	0.412	-0.09	0.1	0.76	0.69	0.96	Not robust	27.05	2	1	0.79
met-a-324	Threonine	13	5e-06	1.2	0.526	0.18	0.29	0.777	-0.11	0.39	0.94	0.08	0.98	0.161	1.17	0.78	0.35	0.91	0.96	Not robust	22.35		1	0.79
met-a-407	Taurocholate	11	5e-06	1.04	0.544	0.04	0.06	0.627	0.04	0.09	0.9	-0.02	0.12	0.843	-0.02	0.1	0.29	0.6	0.96	Not robust	22.51		1	0.8
met-a-489	X-11247	10	5e-06	1.05	0.544	0.05	0.08	0.393	0.1	0.11	0.374	0.19	0.2	0.422	0.11	0.13	0.49	0.47	0.96	Not robust	25.1	1	1	0.8
met-a-516	X-11444	8	5e-06	1.1	0.544	0.1	0.16	0.688	0.11	0.26	0.411	0.34	0.38	0.304	0.45	0.41	0.7	0.49	0.97	Not robust	28.33		1	0.8
met-a-639	X-12680	9	5e-06	0.9	0.539	-0.1	0.17	0.434	-0.17	0.22	0.386	-0.38	0.41	0.448	-0.19	0.24	0.29	0.48	0.96	Not robust	22.41		1	0.8
met-a-682	1-arachidonoylglycerophosphoethanolamine*	14	5e-06	0.9	0.538	-0.11	0.18	0.412	-0.22	0.27	0.503	-0.34	0.49	0.311	-0.31	0.29	0.55	0.62	0.98	Not robust	39.07		1	0.8
met-a-733	X-14745	7	5e-06	1.12	0.544	0.11	0.19	0.949	0.02	0.31	0.808	-0.45	1.76	0.959	-0.03	0.49	0.72	0.76	0.96	Not robust	23.19		1	0.8
met-a-716	X-14057	46	5e-05	0.96	0.55	-0.04	0.07	0.221	-0.13	0.11	0.318	-0.19	0.18	0.191	-0.21	0.16	0.76	0.39	0.95	Not robust	18.59	1	1	0.81
met-a-343	Guanosine	8	5e-06	1.06	0.553	0.06	0.11	0.906	0.02	0.15	0.805	-0.08	0.32	0.753	-0.08	0.24	0.52	0.65	0.94	Not robust	22.26		1	0.81
met-a-378	Acetylphosphate	11	5e-06	0.8	0.563	-0.22	0.38	0.308	-0.61	0.6	0.741	-0.81	2.37	0.393	-0.84	0.94	0.74	0.81	0.96	Not robust	25.07		1	0.81
met-a-401	Gamma-glutamylleucine	16	5e-06	0.86	0.562	-0.16	0.27	0.191	-0.53	0.4	0.0669	-1.15	0.58	0.332	-0.51	0.51	0.53	0.07	0.96	Not robust	23.46	1	1	0.81
met-a-410	1-stearoylglycerophosphoinositol	28	5e-05	1.06	0.561	0.06	0.1	0.739	-0.06	0.17	0.71	0.07	0.2	0.575	-0.17	0.3	0.49	0.94	0.95	Not robust	18.61	2	1	0.81
met-a-495	X-11315	15	5e-06	1.1	0.564	0.1	0.17	0.502	-0.16	0.25	0.232	-0.4	0.32	0.412	-0.24	0.28	0.45	0.09	0.96	Not robust	26.9	1	1	0.81
met-a-515	X-11442	7	5e-06	1.05	0.564	0.05	0.08	0.318	0.1	0.1	0.183	0.24	0.15	0.35	0.11	0.11	0.64	0.17	0.99	Not robust	96.77	1	1	0.81
met-a-565	X-12029	24	5e-06	1.13	0.563	0.12	0.2	0.605	0.21	0.4	0.443	-0.82	1.04	0.761	0.21	0.68	0.99	0.36	0.96	Not robust	22.34		1	0.81
met-a-602	1-eicosatrienoylglycerophosphocholine*	13	5e-06	0.89	0.56	-0.11	0.19	0.884	-0.03	0.24	0.909	0.07	0.57	0.859	-0.05	0.3	0.19	0.74	0.97	Not robust	27.48		1	0.81
met-c-865	Mean diameter for HDL particles	12	5e-08	0.98	0.57	-0.02	0.03	0.5	-0.03	0.04	0.88	0.01	0.07	0.818	-0.01	0.04	0.34	0.7	0.99	Not robust	148.78	1	1	0.82
met-a-363	Xanthine	33	5e-05	0.95	0.574	-0.05	0.09	0.747	-0.06	0.18	0.29	-0.22	0.2	0.498	-0.11	0.17	0.95	0.33	0.94	Not robust	18.35	5	1	0.82
met-a-535	X-11552	7	5e-06	1.08	0.577	0.07	0.13	0.818	0.05	0.23	0.245	-1.09	0.83	0.875	0.05	0.32	0.76	0.21	0.96	Not robust	22.97		1	0.83
met-a-636	X-12644	6	5e-07	1.25	0.584	0.22	0.4	0.78	0.11	0.4	0.451	0.93	1.12	0.536	-0.58	0.88	0.09	0.53	0.97	Not robust	30.84		1	0.83
met-a-688	2-oleoylglycerophosphocholine*	8	5e-06	0.8	0.583	-0.23	0.41	0.675	-0.19	0.46	0.135	-2.58	1.49	0.248	-1.12	0.89	0.09	0.15	0.96	Not robust	23.71		1	0.83
met-a-698	Hydroxyisovaleroyl carnitine	27	5e-05	1.06	0.584	0.06	0.11	0.262	-0.21	0.18	0.194	-0.36	0.27	0.317	-0.32	0.31	0.43	0.1	0.95	Not robust	20.77	3	1	0.83
met-a-734	Gamma-glutamylglutamate	7	5e-06	0.95	0.594	-0.05	0.1	0.569	-0.1	0.18	0.668	0.21	0.46	0.431	-0.22	0.26	0.8	0.58	0.96	Not robust	23.61	1	1	0.84
met-a-309	Creatinine	13	5e-06	1.31	0.6	0.27	0.52	0.719	0.26	0.73	0.756	0.43	1.35	0.987	-0.02	1.08	0.47	0.9	0.96	Not robust	24.87	1	1	0.85
met-a-537	Adrenate (22:4n6)	33	5e-05	0.94	0.601	-0.06	0.12	0.238	-0.21	0.18	0.332	-0.33	0.33	0.128	-0.42	0.27	0.27	0.4	0.95	Not robust	20.95	2	1	0.85
met-c-948	Triglycerides in very large HDL	15	5e-08	1.01	0.604	0.01	0.03	0.991	0	0.03	0.363	0.05	0.05	0.432	0.02	0.03	0.33	0.44	0.99	Not robust	147.93	1	1	0.85
met-a-585	X-12116	47	5e-05	0.98	0.613	-0.02	0.04	0.865	-0.01	0.07	0.758	0.04	0.12	0.974	0	0.11	0.86	0.58	0.95	Not robust	18.14	5	1	0.86
met-a-611	X-12443	7	5e-06	1.04	0.613	0.04	0.07	0.812	-0.03	0.13	0.263	-0.25	0.19	0.501	-0.1	0.14	0.76	0.16	0.96	Not robust	22.51		1	0.86
met-a-355	Proline	24	5e-06	0.92	0.628	-0.08	0.17	0.396	0.23	0.27	0.407	0.26	0.31	0.648	0.16	0.35	0.71	0.18	0.97	Not robust	39.92	2	1	0.86
met-a-431	Homocitrulline	41	5e-05	0.96	0.627	-0.04	0.08	0.643	-0.06	0.13	0.863	0.04	0.25	0.403	-0.25	0.29	0.96	0.73	0.95	Not robust	18.37	2	1	0.86
met-a-491	Bilirubin (E,E)*	8	5e-06	1.03	0.621	0.03	0.06	0.175	0.11	0.08	0.236	0.18	0.14	0.231	0.11	0.09	0.63	0.24	0.98	Not robust	73.58		1	0.86
met-a-503	X-11374	12	5e-06	1.03	0.627	0.03	0.07	0.879	0.02	0.12	0.854	-0.03	0.17	0.96	0.01	0.13	0.84	0.68	0.96	Not robust	23.27		1	0.86
met-a-526	HWESASXX*	6	5e-06	0.92	0.621	-0.08	0.17	0.729	-0.06	0.18	0.577	-0.53	0.87	0.348	-0.24	0.23	0.21	0.63	0.97	Not robust	29.28		1	0.86
met-a-600	X-10346	9	5e-06	1.02	0.617	0.02	0.03	0.904	-0.01	0.07	0.954	0.01	0.1	0.848	-0.02	0.08	0.93	0.91	0.95	Not robust	22.36		1	0.86
met-a-684	X-13431--nonanoylcarnitine*	10	5e-06	1.04	0.62	0.04	0.08	0.657	0.05	0.1	0.803	0.04	0.16	0.683	0.05	0.11	0.55	1	0.99	Not robust	86.18		1	0.86
met-a-690	2-linoleoylglycerophosphocholine*	13	5e-06	0.92	0.623	-0.09	0.18	0.923	-0.03	0.28	0.604	-0.38	0.7	0.628	0.23	0.45	0.74	0.68	0.96	Not robust	23.35		1	0.86
met-c-873	Isoleucine	11	5e-06	1.03	0.624	0.03	0.05	0.778	0.02	0.09	0.623	0.06	0.12	0.159	0.15	0.1	0.68	0.74	0.97	Not robust	27.75	1	1	0.86
met-a-460	Androsterone sulfate	15	5e-06	1.02	0.633	0.02	0.05	0.847	0.01	0.06	0.728	0.03	0.08	0.972	0	0.07	0.7	0.92	0.98	Not robust	59.94		1	0.86
met-a-544	X-11795	6	5e-06	1.15	0.635	0.14	0.29	0.451	0.29	0.39	0.463	0.93	1.14	0.375	0.53	0.54	0.42	0.51	0.96	Not robust	22.4		1	0.86
met-a-749	2-hydroxyglutarate	38	5e-05	1.04	0.63	0.04	0.08	0.997	0	0.15	0.999	0	0.23	0.696	-0.1	0.25	0.98	0.85	0.95	Not robust	18.68	2	1	0.86
met-c-921	Total lipids in small HDL	6	5e-08	0.98	0.635	-0.02	0.04	0.49	-0.04	0.06	0.489	-0.09	0.12	0.492	-0.05	0.07	0.6	0.55	0.99	Not robust	83.13	1	1	0.86
met-c-943	Cholesterol esters in very large HDL	10	5e-08	1.02	0.635	0.02	0.04	0.358	0.05	0.05	0.847	-0.02	0.1	0.29	0.1	0.09	0.3	0.69	0.99	Not robust	82.02	1	1	0.86
met-a-335	Pipecolate	7	5e-06	1.06	0.646	0.06	0.14	0.818	-0.06	0.25	0.756	0.27	0.81	0.829	-0.07	0.31	0.85	0.81	0.95	Not robust	23.39	1	1	0.86
met-a-402	Eicosapentaenoate (EPA; 20:5n3)	7	5e-06	1.05	0.652	0.05	0.12	0.728	-0.09	0.26	0.865	0.1	0.58	0.715	-0.11	0.3	0.93	0.93	0.97	Not robust	32.2		1	0.86
met-a-451	Creatine	26	5e-05	0.96	0.639	-0.04	0.08	0.999	0	0.14	0.402	-0.17	0.2	0.988	0	0.19	0.86	0.46	0.95	Not robust	21.96	2	1	0.86
met-a-461	3-carboxy-4-methyl-5-propyl-2-furanpropanoate (CMPF)	10	5e-06	0.97	0.649	-0.03	0.07	0.928	0.01	0.09	0.901	-0.02	0.17	0.64	0.07	0.15	0.47	0.96	0.96	Not robust	24.58		1	0.86
met-a-482	10-undecenoate (11:1n1)	12	5e-06	1.09	0.648	0.09	0.19	0.462	0.16	0.22	0.619	0.17	0.34	0.481	0.18	0.24	0.27	0.75	0.98	Not robust	44.92		1	0.86
met-a-518	X-11452	30	5e-05	0.97	0.653	-0.03	0.06	0.65	0.04	0.1	0.579	0.1	0.18	0.522	0.09	0.14	0.84	0.45	0.95	Not robust	18.78	2	1	0.86
met-a-522	X-11483	6	5e-06	1.03	0.643	0.03	0.06	0.858	0.02	0.09	0.686	-0.04	0.1	0.94	0.01	0.09	0.64	0.35	0.96	Not robust	25.52		1	0.86
met-a-550	X-11845	9	5e-06	1.04	0.64	0.04	0.08	0.508	0.07	0.1	0.0935	0.69	0.36	0.322	0.17	0.16	0.27	0.1	0.89	Not robust	22.37		1	0.86
met-a-564	Gamma-glutamylthreonine*	6	5e-06	0.9	0.644	-0.11	0.23	0.914	-0.04	0.35	0.903	0.08	0.61	0.732	0.15	0.42	0.52	0.75	0.95	Not robust	22.98		1	0.86
met-a-589	X-12206	30	5e-05	0.95	0.653	-0.05	0.11	0.851	-0.03	0.17	0.875	0.07	0.46	0.798	-0.08	0.32	0.89	0.79	0.95	Not robust	18.94	3	1	0.86
met-c-922	Concentration of small HDL particles	6	5e-07	0.98	0.642	-0.02	0.04	0.461	-0.04	0.06	0.468	-0.1	0.13	0.454	-0.05	0.06	0.6	0.52	0.99	Not robust	86.05		1	0.86
met-a-686	X-13477	29	5e-05	0.93	0.655	-0.07	0.16	0.374	-0.2	0.22	0.231	-0.46	0.38	0.349	-0.36	0.38	0.49	0.26	0.95	Not robust	19.6		1	0.86
met-a-695	X-13553	37	5e-05	0.96	0.656	-0.04	0.1	0.719	0.06	0.15	0.809	-0.05	0.21	0.0999	-0.47	0.28	0.7	0.97	0.95	Not robust	18.51		1	0.86
met-a-502	C-glycosyltryptophan*	14	5e-06	0.9	0.664	-0.1	0.24	0.91	0.05	0.45	0.508	0.44	0.64	0.762	0.15	0.49	0.92	0.34	0.96	Not robust	23.22	1	1	0.87
met-a-595	X-12236	8	5e-06	1.03	0.662	0.03	0.06	0.938	0.01	0.12	0.688	-0.1	0.23	0.701	-0.06	0.15	0.9	0.58	0.96	Not robust	23.34		1	0.87
met-a-671	X-12990--docosapentaenoic acid (n6-DPA)	6	5e-06	1.06	0.664	0.06	0.13	0.68	0.09	0.21	0.556	0.43	0.68	0.669	0.12	0.27	0.7	0.59	0.96	Not robust	26.48		1	0.87
met-a-318	Allantoin	8	5e-06	1.06	0.672	0.05	0.13	0.66	0.08	0.19	0.583	0.14	0.24	0.588	0.11	0.19	0.6	0.67	0.94	Not robust	23.21		1	0.87
met-a-632	X-12544	8	5e-06	0.94	0.671	-0.06	0.13	0.754	-0.06	0.18	0.224	-0.45	0.33	0.561	-0.19	0.32	0.4	0.24	0.96	Not robust	22.98	1	1	0.87
met-c-856	Omega-6 fatty acids	10	5e-08	1.02	0.682	0.02	0.04	0.884	-0.01	0.05	0.987	0	0.13	0.582	-0.05	0.08	0.32	0.88	0.98	Not robust	56.07	1	1	0.88
met-a-377	Glycerol 3-phosphate (G3P)	6	5e-06	0.88	0.687	-0.13	0.31	0.851	-0.13	0.67	0.841	-0.17	0.81	0.724	-0.18	0.49	0.56	0.95	0.95	Not robust	22.53		1	0.89
met-a-406	Taurochenodeoxycholate	6	5e-06	0.97	0.689	-0.03	0.06	0.773	-0.04	0.13	0.505	-0.15	0.2	0.617	-0.08	0.15	0.9	0.51	0.96	Not robust	22.52		1	0.89
met-a-699	Glutaroyl carnitine	8	5e-08	0.94	0.689	-0.07	0.17	0.933	0.02	0.21	0.142	1.16	0.68	0.795	0.07	0.25	0.44	0.11	0.99	Not robust	93.1		1	0.89
met-a-374	Glycerol	11	5e-06	1.08	0.702	0.08	0.2	0.623	0.18	0.36	0.609	-0.45	0.84	0.391	0.43	0.48	0.85	0.53	0.96	Not robust	23.95		1	0.89
met-a-467	Hexanoylcarnitine	8	5e-06	0.94	0.698	-0.06	0.16	0.272	0.18	0.17	0.0997	0.51	0.26	0.277	0.19	0.16	0.3	0.04	0.99	Not robust	82.72	2	1	0.89
met-a-616	Alpha-hydroxyisovalerate	9	5e-06	1.06	0.705	0.06	0.15	0.951	-0.01	0.21	0.742	0.14	0.41	0.934	-0.02	0.24	0.56	0.83	0.98	Not robust	37.86		1	0.89
met-c-858	Free cholesterol	11	5e-08	1.01	0.7	0.01	0.03	0.665	-0.02	0.05	0.221	-0.11	0.08	0.6	-0.03	0.06	0.57	0.14	0.99	Not robust	73.74	1	1	0.89
met-c-918	Phosphatidylcholine and other cholines	6	5e-08	0.98	0.704	-0.02	0.05	0.312	-0.06	0.06	0.444	-0.19	0.22	0.395	-0.07	0.08	0.28	0.47	0.99	Not robust	83.33		1	0.89
met-c-935	Sphingomyelins	8	5e-08	1.02	0.698	0.02	0.05	0.456	-0.04	0.06	0.271	-0.13	0.11	0.572	-0.06	0.1	0.42	0.17	0.98	Not robust	56.4		1	0.89
met-c-946	Concentration of very large HDL particles	11	5e-08	1.01	0.703	0.01	0.03	0.998	0	0.05	0.128	0.14	0.08	0.143	0.08	0.05	0.51	0.13	0.99	Not robust	103.4	1	1	0.89
met-a-408	X-05907	9	5e-06	0.89	0.71	-0.12	0.32	0.111	-0.62	0.39	0.0481	-1.57	0.66	0.12	-0.75	0.43	0.2	0.05	0.96	Not robust	23.99		1	0.89
met-a-432	Aspartylphenylalanine	25	5e-05	1.03	0.711	0.02	0.07	0.479	-0.09	0.12	0.767	-0.05	0.16	0.528	-0.1	0.15	0.92	0.6	0.95	Not robust	17.86	5	1	0.89
met-a-453	Threonate	9	5e-06	0.94	0.712	-0.06	0.17	0.706	-0.09	0.23	0.284	-0.34	0.29	0.752	-0.11	0.32	0.43	0.29	0.96	Not robust	22.11		1	0.89
met-a-694	X-13549	10	5e-06	1.13	0.712	0.12	0.32	0.312	0.55	0.54	0.342	1.17	1.16	0.404	0.59	0.67	0.79	0.36	0.96	Not robust	23.5	1	1	0.89
met-a-743	Tryptophan betaine	7	5e-06	1.03	0.714	0.03	0.07	0.774	0.02	0.08	0.658	-0.11	0.23	0.849	-0.02	0.11	0.28	0.56	0.97	Not robust	37.81		1	0.89
met-a-692	1-palmitoylglycerophosphoinositol*	41	5e-05	0.97	0.717	-0.03	0.08	0.356	-0.12	0.13	0.565	0.11	0.18	0.221	-0.29	0.24	0.91	0.41	0.95	Not robust	18.16	6	1	0.9
met-a-732	X-14662	10	5e-06	1.02	0.72	0.02	0.06	0.296	0.09	0.08	0.228	0.13	0.1	0.298	0.09	0.08	0.63	0.19	0.95	Not robust	23.81	1	1	0.9
met-a-341	Citrate	6	5e-08	0.87	0.723	-0.13	0.38	0.993	0	0.53	0.786	0.37	1.28	0.804	0.17	0.63	0.56	0.7	0.98	Not robust	37.35		1	0.9
met-a-499	X-11334	14	5e-06	1.08	0.724	0.08	0.23	0.67	0.14	0.32	0.481	0.65	0.9	0.507	0.34	0.5	0.43	0.52	0.95	Not robust	23.75		1	0.9
met-a-478	Dehydroisoandrosterone sulfate (DHEA-S)	11	5e-06	1.05	0.73	0.05	0.14	0.779	-0.05	0.18	0.843	0.09	0.44	0.398	-0.23	0.26	0.27	0.92	0.97	Not robust	28.25	1	1	0.9
met-a-497	1-linoleoylglycerophosphoethanolamine*	6	5e-06	1.08	0.727	0.07	0.21	0.57	0.14	0.24	0.997	0	0.61	0.414	0.23	0.26	0.34	0.91	0.98	Not robust	48.55	2	1	0.9
met-a-540	X-11786--methylcysteine	8	5e-06	1.06	0.732	0.05	0.16	0.199	0.25	0.2	0.814	-0.17	0.7	0.376	0.26	0.28	0.34	0.75	0.97	Not robust	27.21		1	0.9
met-a-613	X-12456	11	5e-06	0.97	0.731	-0.03	0.1	0.626	-0.07	0.14	0.0843	-0.48	0.25	0.402	-0.12	0.14	0.66	0.07	0.98	Not robust	40.17	1	1	0.9
met-c-941	Mean diameter for VLDL particles	13	5e-08	1.01	0.728	0.01	0.03	0.281	0.05	0.05	0.923	-0.01	0.13	0.265	0.09	0.08	0.51	0.85	0.99	Not robust	73.22		1	0.9
met-a-436	X-09026	10	5e-06	1.08	0.734	0.08	0.23	0.815	-0.08	0.36	0.396	-0.85	0.95	0.563	-0.26	0.43	0.68	0.34	0.96	Not robust	23.41		1	0.9
met-a-470	Glycochenodeoxycholate	7	5e-06	1.04	0.735	0.04	0.12	0.709	-0.06	0.15	0.193	-0.37	0.25	0.382	-0.16	0.17	0.23	0.12	0.96	Not robust	22	2	1	0.9
met-a-325	Tyrosine	21	5e-06	0.89	0.755	-0.12	0.37	0.697	0.18	0.47	0.0613	2.77	1.39	0.598	0.36	0.68	0.07	0.05	0.96	Not robust	25.77		1	0.91
met-a-397	2-hydroxystearate	18	5e-06	1.08	0.756	0.08	0.26	0.66	0.18	0.4	0.316	1.09	1.06	0.835	0.15	0.7	0.75	0.33	0.96	Not robust	23.33	3	1	0.91
met-a-398	X-05426	6	5e-06	0.94	0.753	-0.06	0.2	0.171	-0.31	0.23	0.248	0.75	0.55	0.381	-0.42	0.43	0.1	0.2	0.96	Not robust	23.3	1	1	0.91
met-a-411	X-06226	14	5e-06	1.1	0.744	0.1	0.3	0.95	0.03	0.44	0.648	0.31	0.66	0.795	-0.16	0.61	0.48	0.72	0.96	Not robust	23.36		1	0.91
met-a-426	X-08402	12	5e-06	1.06	0.751	0.06	0.17	0.518	-0.12	0.19	0.881	-0.05	0.3	0.507	-0.15	0.22	0.26	0.68	0.98	Not robust	58.13		1	0.91
met-a-443	X-10506	57	5e-05	1.04	0.751	0.04	0.12	0.899	-0.02	0.2	0.702	0.12	0.32	0.726	0.14	0.4	0.78	0.77	0.94	Not robust	18.15	3	1	0.91
met-a-496	X-11317	7	5e-07	0.87	0.752	-0.14	0.44	0.913	0.07	0.6	0.205	2.18	1.49	0.39	0.75	0.81	0.39	0.17	0.97	Not robust	30.15		1	0.91
met-a-605	X-12407	37	5e-05	0.99	0.742	-0.01	0.04	0.725	-0.02	0.06	0.255	0.12	0.1	0.603	-0.06	0.11	0.78	0.17	0.95	Not robust	18.64		1	0.91
met-a-647	X-12729	11	5e-06	1.01	0.756	0.01	0.05	0.969	0	0.07	0.64	-0.05	0.1	0.395	-0.1	0.12	0.67	0.49	0.94	Not robust	23.52		1	0.91
met-c-848	Average number of methylene groups in a fatty acid chain	12	5e-06	1.01	0.752	0.01	0.05	0.477	0.03	0.05	0.695	0.03	0.08	0.436	0.04	0.05	0.18	0.79	0.98	Not robust	61.54	1	1	0.91
met-a-514	X-11441	7	5e-06	1.03	0.758	0.03	0.09	0.321	0.1	0.1	0.207	0.21	0.15	0.398	0.1	0.11	0.58	0.15	0.99	Not robust	93.6		1	0.91
met-a-459	Pyridoxate	6	5e-06	1.04	0.767	0.04	0.13	0.84	0.04	0.22	0.476	0.23	0.29	0.409	0.18	0.21	0.71	0.46	0.96	Not robust	22.22		1	0.91
met-a-492	X-02249	6	5e-06	0.92	0.766	-0.08	0.27	0.645	0.13	0.29	0.158	1.33	0.77	0.545	0.21	0.32	0.21	0.13	0.97	Not robust	31.33		1	0.91
met-a-498	X-11327	8	5e-07	0.89	0.766	-0.12	0.41	0.657	-0.24	0.54	0.163	-1.93	1.21	0.708	-0.29	0.75	0.36	0.17	0.97	Not robust	28.01		1	0.91
met-a-676	7-methylguanine	33	5e-05	0.97	0.764	-0.03	0.09	0.883	0.02	0.15	0.995	0	0.3	0.971	0.01	0.24	0.93	0.91	0.95	Not robust	18.43	2	1	0.91
met-a-679	N2,N2-dimethylguanosine	7	5e-07	1.13	0.767	0.12	0.42	0.594	0.32	0.61	0.39	6.77	7.19	0.541	0.56	0.86	0.5	0.4	0.96	Not robust	28.92		1	0.91
met-c-945	Total lipids in very large HDL	12	5e-08	0.99	0.77	-0.01	0.03	0.434	-0.03	0.04	0.787	0.02	0.08	0.362	0.06	0.06	0.52	0.69	0.99	Not robust	113.88	2	1	0.91
met-a-344	N-acetylalanine	11	5e-06	0.84	0.774	-0.17	0.61	0.665	-0.32	0.74	0.278	-10.67	9.24	0.655	-0.59	1.29	0.23	0.28	0.96	Not robust	23.85	1	1	0.91
met-a-368	Beta-hydroxyisovalerate	16	5e-06	0.96	0.775	-0.04	0.14	0.684	0.11	0.26	0.821	-0.1	0.44	0.428	0.26	0.32	0.87	0.88	0.96	Not robust	24.11		1	0.91
met-a-708	3-(3-hydroxyphenyl)propionate	9	5e-06	0.98	0.777	-0.02	0.06	0.578	-0.04	0.08	0.425	-0.14	0.16	0.745	-0.03	0.1	0.32	0.45	0.96	Not robust	21.82		1	0.91
met-a-655	1-linoleoylglycerophosphocholine	9	5e-06	0.89	0.783	-0.11	0.42	0.295	0.49	0.47	0.285	1.51	1.3	0.146	0.89	0.56	0.05	0.23	0.96	Not robust	23.92	1	1	0.92
met-a-741	X-14977--vanillin	35	5e-05	0.98	0.782	-0.02	0.08	0.949	-0.01	0.13	0.441	-0.21	0.27	0.306	0.29	0.28	0.78	0.46	0.95	Not robust	18.33		1	0.92
met-a-603	1-docosahexaenoylglycerophosphocholine*	35	5e-05	0.98	0.79	-0.02	0.08	0.537	-0.09	0.14	0.328	-0.2	0.2	0.533	-0.12	0.18	0.88	0.32	0.95	Not robust	18.35	2	1	0.92
met-a-706	1-oleoylglycerophosphoethanolamine	28	5e-05	0.97	0.788	-0.03	0.12	0.104	-0.27	0.17	0.875	0.05	0.3	0.195	-0.33	0.25	0.37	0.77	0.95	Not robust	19.2	1	1	0.92
met-a-729	X-14626	9	5e-06	0.96	0.789	-0.05	0.17	0.306	-0.25	0.25	0.335	-0.39	0.38	0.261	-0.34	0.28	0.68	0.32	0.98	Not robust	42.22	1	1	0.92
met-a-342	Glycerate	7	5e-06	0.89	0.792	-0.12	0.45	0.975	0.02	0.53	0.287	-1.55	1.3	0.415	0.78	0.89	0.16	0.3	0.96	Not robust	22.84	1	1	0.92
met-a-375	Kynurenine	6	5e-07	1.1	0.795	0.09	0.36	0.989	-0.01	0.39	0.524	0.41	0.59	0.793	0.13	0.46	0.17	0.52	0.98	Not robust	50.74		1	0.92
met-a-630	X-12524	14	5e-06	1.1	0.794	0.1	0.38	0.546	0.31	0.51	0.913	-0.1	0.93	0.523	0.39	0.6	0.29	0.81	0.96	Not robust	24.39	1	1	0.92
met-a-507	X-01911	9	5e-06	0.97	0.802	-0.03	0.11	0.617	0.07	0.15	0.629	0.14	0.27	0.48	0.13	0.18	0.44	0.53	0.96	Not robust	26.75		1	0.92
met-a-350	Laurate (12:0)	7	5e-07	1.15	0.806	0.14	0.57	0.956	-0.04	0.67	0.961	-0.79	15.33	0.974	0.03	1.01	0.21	0.95	0.96	Not robust	27.47		1	0.92
met-a-661	X-12798	6	5e-06	1.03	0.805	0.03	0.12	0.574	0.05	0.09	0.577	0.11	0.18	0.618	0.05	0.09	0.09	0.56	1	Not robust	232.87		1	0.92
met-a-399	Indolelactate	11	5e-06	1.04	0.81	0.04	0.17	0.578	0.16	0.29	0.538	0.31	0.49	0.517	0.24	0.36	0.77	0.55	0.96	Not robust	24.96		1	0.93
met-a-517	X-11445--5-alpha-pregnan-3beta,20alpha-disulfate	9	5e-06	0.98	0.81	-0.02	0.09	0.468	0.09	0.12	0.489	0.26	0.35	0.432	0.15	0.18	0.23	0.44	0.61	Not robust	27.67		1	0.93
met-a-412	X-06246	12	5e-06	0.95	0.819	-0.06	0.24	0.998	0	0.35	0.29	1.33	1.19	0.974	-0.02	0.5	0.56	0.26	0.96	Not robust	24.34		1	0.93
met-a-693	X-13548	27	5e-06	1.05	0.828	0.05	0.23	0.646	0.16	0.35	0.576	-0.44	0.78	0.393	0.56	0.65	0.6	0.51	0.96	Not robust	24.1	1	1	0.94
met-c-866	Histidine	7	5e-07	0.98	0.832	-0.02	0.08	0.979	0	0.09	0.422	0.33	0.38	0.341	0.14	0.14	0.2	0.39	0.98	Not robust	45.58		1	0.95
met-a-434	Palmitoylcarnitine	29	5e-05	1.03	0.843	0.03	0.13	0.505	0.13	0.2	0.127	0.49	0.31	0.422	0.25	0.31	0.4	0.11	0.95	Not robust	19.3	3	1	0.96
met-a-395	Dihomo-linoleate (20:2n6)	35	5e-05	1.02	0.849	0.02	0.1	0.555	-0.09	0.15	0.487	-0.15	0.21	0.536	-0.12	0.2	0.6	0.37	0.95	Not robust	18.2	3	1	0.96
met-a-608	X-12435	15	5e-06	1	0.848	0	0.02	0.935	0	0.03	0.472	-0.03	0.04	0.919	0	0.04	0.96	0.42	0.92	Not robust	24.57		1	0.96
met-c-937	Total phosphoglycerides	9	5e-08	1.01	0.85	0.01	0.04	0.724	-0.02	0.06	0.616	-0.09	0.17	0.419	-0.06	0.07	0.28	0.57	0.99	Not robust	64.12		1	0.96
met-a-420	2-hydroxybutyrate (AHB)	9	5e-06	1.05	0.855	0.05	0.27	0.986	0.01	0.31	0.247	-0.62	0.49	0.318	-0.41	0.39	0.13	0.16	0.96	Not robust	24.93		1	0.96
met-a-348	Ascorbate (Vitamin C)	10	5e-06	0.99	0.859	-0.01	0.07	0.79	0.03	0.09	0.962	0.01	0.24	0.432	0.12	0.14	0.4	0.92	0.94	Not robust	23.14		1	0.96
met-a-380	Choline	15	5e-06	1.09	0.859	0.09	0.48	0.212	0.8	0.64	0.819	-0.39	1.69	0.261	1.31	1.12	0.3	0.77	0.96	Not robust	24.28		1	0.96
met-a-551	X-11847	7	5e-06	1.01	0.861	0.01	0.06	0.89	-0.02	0.11	0.982	-0.01	0.26	0.768	-0.05	0.16	0.83	0.95	0.96	Not robust	22.14		1	0.96
met-a-625	10-heptadecenoate (17:1n7)	41	5e-05	1.02	0.867	0.02	0.1	0.686	-0.06	0.16	0.741	0.1	0.31	0.294	-0.31	0.29	0.72	0.77	0.95	Not robust	17.97		1	0.96
met-a-696	X-13619	15	5e-06	0.93	0.867	-0.07	0.44	0.982	-0.01	0.55	0.245	1.68	1.38	0.434	-0.72	0.89	0.19	0.2	0.96	Not robust	23.16	3	1	0.96
met-a-697	2-methylbutyroylcarnitine	15	5e-06	0.97	0.866	-0.03	0.19	0.277	-0.36	0.33	0.977	0.02	0.85	0.339	-0.53	0.54	0.88	0.95	0.95	Not robust	23.32	1	1	0.96
met-a-567	X-12039	11	5e-06	0.99	0.871	-0.01	0.07	0.935	-0.01	0.11	0.392	0.13	0.15	0.794	-0.04	0.15	0.62	0.28	0.96	Not robust	23.2		1	0.97
met-a-569	X-12056	7	5e-06	0.98	0.872	-0.02	0.11	0.296	-0.16	0.15	0.143	-0.37	0.22	0.248	-0.22	0.17	0.46	0.11	0.96	Not robust	22.98	3	1	0.97
met-a-669	X-12851	35	5e-05	1	0.875	0	0.02	0.972	0	0.03	0.434	-0.02	0.03	0.956	0	0.02	0.94	0.17	0.95	Not robust	18.6	1	1	0.97
met-a-594	X-12231	7	5e-06	0.97	0.877	-0.03	0.19	0.407	-0.2	0.24	0.425	1.16	1.33	0.399	-0.34	0.37	0.22	0.41	0.96	Not robust	22.83		1	0.97
met-a-352	Urea	7	5e-06	1.03	0.913	0.03	0.31	0.881	0.07	0.45	0.857	0.17	0.9	0.993	-0.01	0.6	0.61	0.88	0.96	Not robust	22.38	1	1	0.98
met-a-353	Cortisol	31	5e-05	0.99	0.922	-0.01	0.11	0.827	-0.04	0.18	0.503	0.21	0.32	0.971	0.01	0.3	0.8	0.44	0.95	Not robust	19.02	4	1	0.98
met-a-369	Taurodeoxycholate	8	5e-06	1.01	0.902	0.01	0.08	0.705	0.04	0.1	0.86	0.04	0.24	0.592	0.08	0.14	0.41	0.88	0.96	Not robust	22.6		1	0.98
met-a-405	Glycodeoxycholate	42	5e-05	1	0.922	0	0.02	0.833	0.01	0.04	0.194	-0.13	0.1	0.907	-0.01	0.08	0.92	0.17	0.95	Not robust	18.56	3	1	0.98
met-a-423	1-palmitoylglycerol (1-monopalmitin)	8	5e-06	0.95	0.901	-0.05	0.41	0.721	-0.16	0.44	0.285	-2.63	2.24	0.872	-0.12	0.74	0.1	0.29	0.96	Not robust	23.05		1	0.98
met-a-428	X-08766	11	5e-06	1.02	0.904	0.02	0.16	0.651	-0.11	0.25	0.241	-0.5	0.39	0.371	-0.25	0.26	0.66	0.17	0.96	Not robust	21.84		1	0.98
met-a-485	X-02269	8	5e-06	1.01	0.918	0.01	0.1	0.941	0.01	0.15	0.74	0.15	0.43	0.951	0.01	0.21	0.56	0.75	0.94	Not robust	30.19		1	0.98
met-a-506	X-11412	6	5e-07	1.07	0.898	0.07	0.55	0.667	0.27	0.64	0.2	-12.34	8.05	0.622	0.6	1.14	0.25	0.2	0.97	Not robust	27.7		1	0.98
met-a-536	X-11593--O-methylascorbate*	6	5e-08	1.03	0.918	0.03	0.26	0.37	0.2	0.22	0.0934	0.74	0.34	0.428	0.19	0.22	0.16	0.06	0.99	Not robust	170.04		1	0.98
met-a-548	X-11820	52	5e-05	0.99	0.922	-0.01	0.06	0.78	-0.03	0.11	0.69	-0.05	0.13	0.612	-0.09	0.17	0.91	0.68	0.95	Not robust	19.28	4	1	0.98
met-a-553	X-11850	36	5e-05	1	0.901	0	0.03	0.467	0.03	0.05	0.458	0.05	0.06	0.466	0.04	0.06	0.76	0.36	0.95	Not robust	18.12	2	1	0.98
met-a-562	X-12013	44	5e-05	1	0.891	0	0.02	0.438	0.03	0.04	0.441	0.03	0.03	0.582	0.02	0.03	0.73	0.26	0.93	Not robust	18.48	4	1	0.98
met-a-588	X-12189	18	5e-06	1	0.912	0	0.02	0.967	0	0.04	0.223	0.05	0.04	0.678	0.01	0.03	0.56	0.08	0.96	Not robust	23.73		1	0.98
met-a-590	X-12212	52	5e-05	0.99	0.897	-0.01	0.04	0.631	0.03	0.07	0.271	0.09	0.08	0.251	0.12	0.1	0.71	0.18	0.95	Not robust	18.46	1	1	0.98
met-a-597	X-12253	39	5e-05	1.01	0.919	0.01	0.05	0.99	0	0.08	0.196	0.17	0.13	0.739	0.04	0.11	0.82	0.16	0.94	Not robust	17.94	2	1	0.98
met-a-637	X-12645	9	5e-06	1.01	0.885	0.01	0.09	0.766	-0.06	0.21	0.306	0.7	0.63	0.819	-0.08	0.34	0.97	0.3	0.96	Not robust	23.11		1	0.98
met-a-667	X-12850	7	5e-06	1.01	0.92	0.01	0.13	0.946	0.01	0.15	0.36	-0.22	0.22	0.965	0.01	0.17	0.3	0.26	0.97	Not robust	32.52		1	0.98
met-a-674	X-13183--stearamide	34	5e-05	1.01	0.899	0.01	0.06	0.187	0.12	0.09	0.037	0.26	0.12	0.123	0.2	0.13	0.56	0.02	0.95	Not robust	18.37	2	1	0.98
met-a-689	2-stearoylglycerophosphocholine*	7	5e-06	0.98	0.897	-0.02	0.13	0.761	-0.08	0.27	0.949	0.07	1.05	0.533	-0.26	0.39	0.92	0.94	0.97	Not robust	25.29	2	1	0.98
met-a-735	Octadecanedioate	39	5e-05	1.01	0.919	0.01	0.08	0.592	0.07	0.14	0.963	-0.01	0.23	0.511	0.13	0.2	0.96	0.93	0.95	Not robust	18.86	4	1	0.98
met-a-753	Cis-4-decenoyl carnitine	52	5e-05	1.01	0.909	0.01	0.07	0.951	-0.01	0.12	0.34	0.14	0.14	0.602	0.09	0.17	0.87	0.28	0.96	Not robust	23.29	3	1	0.98
met-c-838	Acetoacetate	11	5e-06	1.01	0.916	0.01	0.06	0.152	-0.11	0.08	0.922	-0.01	0.12	0.248	-0.14	0.11	0.27	0.85	0.96	Not robust	25.63	1	1	0.98
met-c-944	Free cholesterol in very large HDL	13	5e-08	1	0.893	0	0.03	0.516	-0.03	0.04	0.864	0.01	0.08	0.317	0.08	0.07	0.73	0.82	0.99	Not robust	102.98	2	1	0.98
met-a-677	Phenylacetylglutamine	11	5e-06	0.99	0.927	-0.01	0.11	0.807	-0.04	0.17	0.964	0.01	0.24	0.771	-0.06	0.22	0.67	0.92	0.96	Not robust	23.96		1	0.98
met-c-894	Lactate	11	5e-06	0.99	0.925	-0.01	0.05	0.621	-0.04	0.09	0.635	0.07	0.15	0.36	-0.14	0.15	0.78	0.57	0.96	Not robust	24.17	1	1	0.98
met-a-681	Oleoylcarnitine	32	5e-05	1.01	0.93	0.01	0.09	0.404	0.12	0.15	0.0304	0.59	0.26	0.523	0.14	0.21	0.87	0.02	0.95	Not robust	19.47	4	1	0.98
met-c-940	Valine	9	5e-07	1	0.94	0	0.06	0.275	-0.08	0.07	0.16	-0.31	0.2	0.485	-0.07	0.09	0.35	0.15	0.98	Not robust	51.09		1	0.99
met-a-371	X-03003	43	5e-05	0.99	0.942	-0.01	0.13	0.522	-0.14	0.22	0.728	0.12	0.35	0.572	-0.23	0.4	0.81	0.68	0.95	Not robust	18.05	3	1	0.99
met-a-373	X-03094	6	5e-07	0.97	0.948	-0.03	0.43	0.466	0.32	0.44	0.87	0.34	1.92	0.368	0.73	0.74	0.1	0.85	0.98	Not robust	47.21		1	0.99
met-a-425	1-stearoylglycerol (1-monostearin)	14	5e-06	0.99	0.955	-0.01	0.2	0.146	0.44	0.3	0.285	0.79	0.71	0.27	0.46	0.4	0.54	0.26	0.96	Not robust	23.96	2	1	0.99
met-a-505	X-03056--N-[3-(2-Oxopyrrolidin-1-yl)propyl]acetamide	14	5e-06	0.99	0.951	-0.01	0.13	0.364	-0.2	0.22	0.511	-0.2	0.3	0.349	-0.25	0.26	0.77	0.46	0.96	Not robust	36.84	2	1	0.99
met-a-555	X-11858	6	5e-06	1	0.954	0	0.06	0.574	0.05	0.08	0.539	-0.07	0.1	0.531	0.1	0.15	0.5	0.48	0.97	Not robust	25.92		1	0.99
met-a-610	X-12442--5,8-tetradecadienoate	6	5e-06	1	0.947	0	0.06	0.979	0	0.18	0.689	0.14	0.32	0.929	0.02	0.21	0.99	0.64	0.98	Not robust	36.94		1	0.99
met-a-638	Asparagine	33	5e-06	0.99	0.956	-0.01	0.17	0.329	0.28	0.29	0.589	0.21	0.39	0.205	0.55	0.42	0.65	0.52	0.97	Not robust	27.99	2	1	0.99
met-a-678	Pro-hydroxy-pro	9	5e-06	1.02	0.945	0.02	0.26	0.483	-0.23	0.32	0.309	-0.69	0.63	0.576	-0.22	0.38	0.25	0.26	0.96	Not robust	24.12	2	1	0.99
met-c-920	Pyruvate	18	5e-06	1	0.95	0	0.05	0.798	0.02	0.07	0.25	-0.09	0.07	0.693	0.03	0.07	0.12	0.13	0.96	Not robust	27.02		1	0.99
met-a-306	Leucine	12	5e-08	0.97	0.961	-0.03	0.71	0.827	0.2	0.92	0.213	-5.67	4.27	0.307	1.97	1.84	0.22	0.21	0.97	Not robust	36.41		1	0.99
met-a-620	1-heptadecanoylglycerophosphocholine	32	5e-05	0.99	0.961	-0.01	0.12	0.37	-0.14	0.16	0.383	-0.34	0.38	0.206	-0.38	0.3	0.2	0.37	0.94	Not robust	18.13	4	1	0.99
met-a-712	Dihomo-linolenate (20:3n3 or n6)	11	5e-06	1.01	0.959	0.01	0.22	0.497	0.2	0.29	0.572	0.37	0.63	0.594	0.2	0.37	0.5	0.56	0.97	Not robust	30.39	3	1	0.99
met-a-649	X-12740	10	5e-06	1	0.965	0	0.06	0.755	0.03	0.09	0.858	0.03	0.17	0.714	0.05	0.14	0.67	0.86	0.96	Not robust	24		1	0.99
met-a-658	X-12776	13	5e-05	0.98	0.966	-0.02	0.36	0.893	0.09	0.64	0.951	0.06	0.94	0.922	0.08	0.81	0.89	0.93	0.95	Not robust	18.62	1	1	0.99
met-a-329	Palmitate (16:0)	19	5e-06	0.99	0.979	-0.01	0.28	0.962	0.02	0.41	0.176	-1.17	0.83	0.851	-0.12	0.66	0.49	0.15	0.96	Not robust	23.81		1	0.99
met-a-330	Nonadecanoate (19:0)	6	5e-06	1.01	0.983	0.01	0.29	0.585	0.26	0.47	0.659	-0.68	1.42	0.549	0.42	0.66	0.7	0.65	0.96	Not robust	24.21	1	1	0.99
met-a-390	X-04494	8	5e-06	1	0.984	0	0.15	0.839	0.08	0.38	0.909	0.12	1.04	0.896	0.07	0.54	0.97	0.91	0.96	Not robust	22.02		1	0.99
met-a-414	X-06307	28	5e-05	1	0.975	0	0.11	0.769	-0.05	0.18	0.91	0.03	0.26	0.609	-0.12	0.23	0.7	0.91	0.95	Not robust	18.73	3	1	0.99
met-a-447	Hyodeoxycholate	7	5e-06	1	0.974	0	0.07	0.568	0.07	0.12	0.449	0.2	0.25	0.367	0.13	0.13	0.7	0.41	0.96	Not robust	24.11		1	0.99
met-a-538	Homostachydrine*	42	5e-05	1	0.983	0	0.02	0.866	-0.01	0.04	0.88	-0.01	0.03	0.928	0	0.03	0.84	0.78	0.94	Not robust	18.06		1	0.99
met-a-673	X-13069	9	5e-06	1	0.985	0	0.2	0.609	-0.13	0.25	0.969	0.02	0.61	0.543	-0.28	0.44	0.22	0.96	0.96	Not robust	24.48	2	1	0.99
met-a-710	2-hydroxypalmitate	6	5e-07	0.98	0.974	-0.02	0.53	0.802	-0.16	0.63	0.504	-3.07	4.19	0.824	-0.24	1	0.29	0.5	0.97	Not robust	28.67	1	1	0.99
met-c-897	Leucine	11	5e-06	1	0.976	0	0.06	0.37	-0.07	0.08	0.763	0.05	0.16	0.365	-0.13	0.14	0.21	0.75	0.97	Not robust	37.24		1	0.99
met-c-917	Other polyunsaturated fatty acids than 18:2	10	5e-08	1	0.983	0	0.03	0.3	-0.03	0.03	0.29	-0.06	0.05	0.265	-0.04	0.03	0.1	0.19	0.99	Not robust	143.62		1	0.99
met-c-942	Total cholesterol in very large HDL	10	5e-08	1	0.987	0	0.04	0.752	-0.02	0.05	0.886	-0.01	0.1	0.596	-0.05	0.09	0.37	0.87	0.99	Not robust	88.41	2	1	0.99
met-a-512	X-11438	17	5e-06	1	0.994	0	0.11	0.802	0.05	0.18	0.769	-0.09	0.31	0.663	0.1	0.24	0.75	0.74	0.96	Not robust	23.63		1	0.99
met-a-725	X-14473	7	5e-06	1	0.992	0	0.17	0.569	0.13	0.22	0.365	0.52	0.52	0.619	0.14	0.27	0.35	0.34	0.96	Not robust	26.47	1	1	0.99

## Sheet: Supplementary Table 2
Metabolite	Mean ALS expression	Mean control expression	ALS to control ratio	ANOVA P-value
(R)-3-hydroxybutyrylcarnitine	1.54	0.81	1.901	0.002
(S)-3-hydroxybutyrylcarnitine	1.35	1.15	1.174	0.274
3-decenoylcarnitine	0.551	0.611	0.902	0.584
3-hydroxydecanoylcarnitine	1.1	1.28	0.859	0.19
3-hydroxyhexanoylcarnitine	1.24	0.991	1.251	0.062
3-hydroxyoctanoylcarnitine	1.08	1.23	0.878	0.195
3-hydroxyoctanoylcarnitine	1.06	1.19	0.891	0.219
3-hydroxyoleoylcarnitine	1.11	0.958	1.159	0.191
3-hydroxypalmitoylcarnitine	1.1	0.993	1.108	0.337
4-methylnonanoylcarnitine	0.582	0.439	1.326	0.438
5-dodecenoylcarnitine	1.58	1.46	1.082	0.696
acetylcarnitine	1.06	0.93	1.14	0.016
adipoylcarnitine	1.51	0.937	1.612	0.044
adrenoylcarnitine	0.891	0.716	1.244	0.17
arachidonoylcarnitine	1.07	0.932	1.148	0.081
arachidoylcarnitine	1.03	0.988	1.043	0.503
behenoylcarnitine	0.721	0.681	1.059	0.601
carnitine	1.04	1.05	0.99	0.855
cerotoylcarnitine	1.05	1.04	1.01	0.931
cis-34-methyleneheptanoylcarnitine	1.17	1.07	1.093	0.371
cis-4-decenoylcarnitine	1.16	1.12	1.036	0.794
decanoylcarnitine	1.32	1.44	0.917	0.684
deoxycarnitine	1.01	1.04	0.971	0.567
dihomo-linolenoylcarnitine	1.13	1	1.13	0.171
dihomo-linoleoylcarnitine	1.08	0.893	1.209	0.06
docosahexaenoylcarnitine	1.24	0.968	1.281	0.146
docosapentaenoylcarnitine	1.25	1.09	1.147	0.231
eicosenoylcarnitine	1.04	0.755	1.377	0.017
hexanoylcarnitine	1.37	1.26	1.087	0.716
laurylcarnitine	1.25	1.55	0.806	0.322
lignoceroylcarnitine	1.04	1.03	1.01	0.916
linolenoylcarnitine	1.04	0.945	1.101	0.166
linoleoylcarnitine	1.06	0.956	1.109	0.116
margaroylcarnitine	1.08	0.986	1.095	0.292
myristoleoylcarnitine	1.29	1.21	1.066	0.73
myristoylcarnitine	1.08	1.14	0.947	0.744
nervonoylcarnitine	1.01	0.809	1.248	0.075
nonanoylcarnitine	1.25	1.23	1.016	0.932
octadecanedioylcarnitine	1.13	1.02	1.108	0.253
octadecenedioylcarnitine	1.24	0.95	1.305	0.018
octanoylcarnitine	1.44	1.56	0.923	0.757
oleoylcarnitine	1.12	0.936	1.197	0.02
palmitoleoylcarnitine	1.24	1.24	1	0.995
palmitoylcarnitine	1.06	0.97	1.093	0.194
pimeloylcarnitine/3-methyladipoylcarnitine	1.4	1.31	1.069	0.78
stearoylcarnitine	1.19	1.01	1.178	0.088
suberoylcarnitine	1.63	0.832	1.959	0.018
undecenoylcarnitine	1.06	1.03	1.029	0.711
ximenoylcarnitine	1.15	0.971	1.184	0.025

## Sheet: Supplementary Table 3
Metabolite	Mean ALS expression	Mean control expression	ALS to control ratio	ANOVA P-value
Fructose	2.27	1.56	1.455	0.169
Glucose	1.05	1	1.05	0.259
Lactate	1.09	1.04	1.048	0.428
Mannose	1.08	0.95	1.137	0.081
Pyruvate	1.14	1.02	1.118	0.189

## Sheet: Supplementary Table 4
Metabolite	Coef	Exp_coef	SE	Z	p_value	LowerCI	UpperCI
Glucose	0.572338	1.77241	0.855127	0.669302	0.503303	0.331648	9.47215
Pyruvate	-0.213114	0.808064	0.348917	-0.610788	0.54134	0.4078	1.60119
Mannose	0.654819	1.92479	0.485805	1.34791	0.177689	0.742791	4.98772
Lactate	-1.11329	0.328477	0.535586	-2.07864	0.0376507	0.114978	0.938418
Fructose	0.1045	1.11016	0.0429003	2.43587	0.0148558	1.02063	1.20754

## Sheet: Supplementary Table 5
Metabolite	Coef	Exp_coef	SE	Z	p_value	LowerCI	UpperCI
Mannose	0.156246	1.16911	0.430112	0.363267	0.716406	0.503204	2.71624
Glucose	-1.03804	0.354148	0.8459	-1.22714	0.219769	0.0674766	1.85873
Pyruvate	0.37815	1.45958	0.29109	1.29908	0.193916	0.824996	2.58229
Fructose	-0.0815908	0.921649	0.0488894	-1.66889	0.09514	0.837435	1.01433
Lactate	1.12218	3.07156	0.451973	2.48286	0.0130333	1.2666	7.44866

## Sheet: Supplementary Table 6
Metabolite	P - value
AAA	0.02127
Alpha KG	1.816e-07
Butyric acid	0.01055
Citric Acid	0.00331
Dextrin	3.925e-05
Fructose 6 phosphate	4.994e-05
Fructose	0.0001881
Glucose 1 phosphate	0.5842
Gamma-ABA	0.001448
Glucose	0.7498
Glycerol phosphate	0.01644
Hexanoic acid	0.001086
Inosine	8.17e-05
L-malic acid	1.831e-06
lactic acid	0.03761
Maltose	0.03171
Propanoic acid	0.000146
Succianmic Acid	8.617e-06
